# Supplementary material
Source: PubMed Central journal article supplement (PMC3056164)
Supplement: NIHMS253729-supplement-1_si_001.pdf [file NIHMS253729-supplement-1_si_001.pdf]

# Supporting Information

## Remote Stereinduction in the Acylation of Fully-Substituted Enolates: Tandem Reformatsky/Quaternary Claisen Condensations of Silyl Glyoxylates and $\beta$ -Lactones

Stephen N. Greszler, Justin T. Malinowski, and Jeffrey S. Johnson\*

*Department of Chemistry, University of North Carolina at Chapel Hill, Chapel Hill, North Carolina 27599-3290*

[jsj@unc.edu](mailto:jsj@unc.edu)

### Table of Contents

|                                                                                                                                                           |     |
|-----------------------------------------------------------------------------------------------------------------------------------------------------------|-----|
| General Methods and Materials                                                                                                                             | S2  |
| Preparation of Enantioenriched $\beta$ -Lactone S1                                                                                                        | S3  |
| Preparation of Reformatsky Reagent                                                                                                                        | S4  |
| General Procedure A for the Reformatsky Initiated Cascade Coupling of Silyl Glyoxylate and $\beta$ -Lactones Affording $\beta$ -hydroxyketones 3a-c, 3h-k | S5  |
| General Procedure B for the Reformatsky Initiated Cascade Coupling of Silyl Glyoxylate and $\beta$ -Lactones Affording $\beta$ -hydroxyketones 3d-g       | S8  |
| General Procedure C for the Reformatsky Initiated Cascade Coupling of Silyl Glyoxylate and $\beta$ -Lactams Affording $\beta$ -aminoketones 3l-2m         | S11 |
| Stereochemical Analysis of $\beta$ -hydroxyketone Products                                                                                                | S12 |
| Diester Functionalization of $\beta$ -hydroxyketone Products                                                                                              | S17 |
| Synthesis of Leustroducsin B Core                                                                                                                         | S19 |
| $^1\text{H}$ , $^{13}\text{C}$ NMR Spectra                                                                                                                | S21 |

**Methods: General.** Infrared (IR) spectra were obtained using a Jasco 460 Plus Fourier transform infrared spectrometer. Proton and carbon magnetic resonance spectra ( $^1\text{H}$  NMR and  $^{13}\text{C}$  NMR) were recorded on a Bruker model Avance 400 ( $^1\text{H}$  NMR at 400 MHz and  $^{13}\text{C}$  at 100 MHz) or a Bruker model Avance 500 ( $^1\text{H}$  NMR at 500 MHz and  $^{13}\text{C}$  NMR at 125 MHz) spectrometer with solvent resonance as the internal standard ( $^1\text{H}$  NMR:  $\text{CDCl}_3$  at 7.26 ppm;  $^{13}\text{C}$  NMR:  $\text{CDCl}_3$  at 77.0 ppm).  $^1\text{H}$  NMR data are reported as follows: chemical shift, multiplicity (s = singlet, br s = broad singlet, d = doublet, t = triplet, br t = broad triplet, q = quartet, m = multiplet), coupling constants (Hz), and integration. Mass spectra were obtained using a Bruker BioTOF II spectrometer with electrospray ionization calibrated with CsOAc. All samples were prepared in methanol. Analytical thin layer chromatography (TLC) was performed on Sorbent Technologies 0.20 mm Silica G TLC plates. Visualization was accomplished with UV light and/or aqueous ceric ammonium nitrate solution followed by heating. Purification of the reaction products was carried out by flash chromatography using Siliacflash-P60 silica gel (40-63 $\mu\text{m}$ ) purchased from Silicycle. Purification via HPLC was performed on a Varian Prepstar SD-1 Solvent Delivery System equipped with a Cyano 60 Å 6 $\mu\text{m}$  column from Berger Instruments. Specific parameters used in the separation of compounds are detailed under applicable entries. Unless otherwise noted, all reactions were carried out under an atmosphere of dry nitrogen in oven-dried glassware with magnetic stirring. Yield refers to isolated yield of analytically pure material unless otherwise noted. Yields are reported for a specific experiment and as a result may differ slightly from those found in the tables, which are averages of at least two experiments

**Materials: General.** Tetrahydrofuran, diethyl ether, dichloromethane, and toluene were dried by passage through a column of neutral alumina under nitrogen prior to use. Zinc metal was washed with 1 M HCl, water, acetone, and diethyl ether and then dried under vacuum at 60 °C for 16 h prior to storage in a nitrogen-filled glove box. Lithium chloride was dried and stored in a 100 °C oven. Diisopropylethylamine and triethylamine were freshly distilled from calcium hydride prior to use. Propionyl chloride, propionyl bromide, acetyl bromide, and hydrocinnamaldehyde were distilled under nitrogen immediately before use. Lactones **S1-S5**,<sup>1</sup> **S6**,<sup>2</sup> **S7**,<sup>3</sup> **S8**,<sup>4</sup> and lactams<sup>5</sup> **S9**<sup>6</sup> and **S10**<sup>7</sup> were obtained using known procedures. Silyl glyoxylates **S11-S12**<sup>8</sup> and **S13**<sup>9</sup> were prepared according to the published procedures. All other reagents were purchased from commercial sources and were used as received unless otherwise noted.

---

<sup>1</sup> Nelson, S. G., Peelen, T. J., Wan, Z. *J. Am. Chem. Soc.* **1999**, *121*, 9742-9743.

<sup>2</sup> Yang, H. W., Romo, D. *J. Org. Chem.* **1997**, *62*, 4-5.

<sup>3</sup> Wang, Y., Zhao, C., Romo, D. *Org. Lett.* **1999**, *1*, 1197-1199.

<sup>4</sup> Nelson, S. G., Zhu, C., Shen, X. *J. Am. Chem. Soc.* **2004**, *126*, 14-15.

<sup>5</sup> Kim, S., Lee, P. H., Lee, T. A. *Synth. Commun.* **1988**, *18*, 247-252.

<sup>6</sup> Deshmukh, A. R., Chincholkar, P. M., Kale, A. S., Gumaste, V. K. *Tetrahedron.* **2009**, *65*, 2605-2609.

<sup>7</sup> Otto, H.-H., Bergmann, H.-J. *Arch. Pharm.* **1986**, *319*, 635-641.

<sup>8</sup> Greszler, S. N.; Johnson, J. S. *Angew. Chem. Int. Ed.* **2009**, *48*, 3689.

<sup>9</sup> Nicewicz, D. A.; Brétéché, G.; Johnson, J. S. *Org. Synth.* **2008**, *85*, 278.

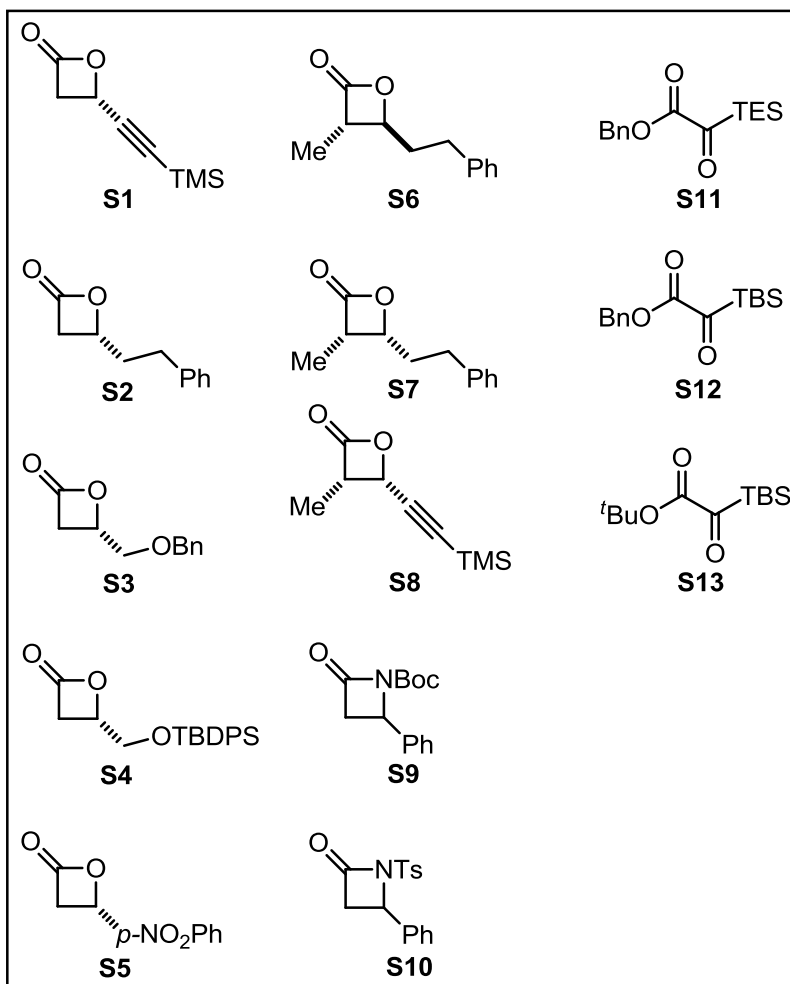

### Preparation of S1:

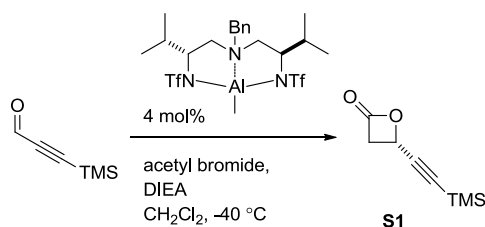

### (S)-4-((trimethylsilyl)ethynyl)oxetan-2-one (S1):

The title compound was prepared according to the procedure described by Nelson<sup>1</sup> with the following modifications:

1. Instead of purification via Kugelrohr distillation, the crude  $\beta$ -lactone was purified via flash chromatography (92.5:7.5 to 85:15 hexanes:ethyl acetate), affording the title compound (67% yield) as a light yellow oil whose spectral properties matched those reported in the literature.<sup>1</sup>

2. The enantiomeric excess of the prepared lactone was assayed via supercritical fluid chromatographic (SFC) analysis of the corresponding  $\beta$ -hydroxyketone **3b** (*vide infra*). Enantiomeric excesses ranged from 78-83% using this method. CSP-SFC analysis of a sample of **3b** showed that the product was enriched to 78% ee (Chiralpak OD column, 3.0% MeOH, 1.0 mL/min, 150 psi, 24 °C, 210 nm,  $t_r$ -major enantiomer: 12.9 min,  $t_r$ -minor enantiomer: 25.9 min; CSP-SFC traces for a mixture of enantiomers and of the enantioenriched product are attached below:

Enantiomeric Mixture:

Enantioenriched Sample:

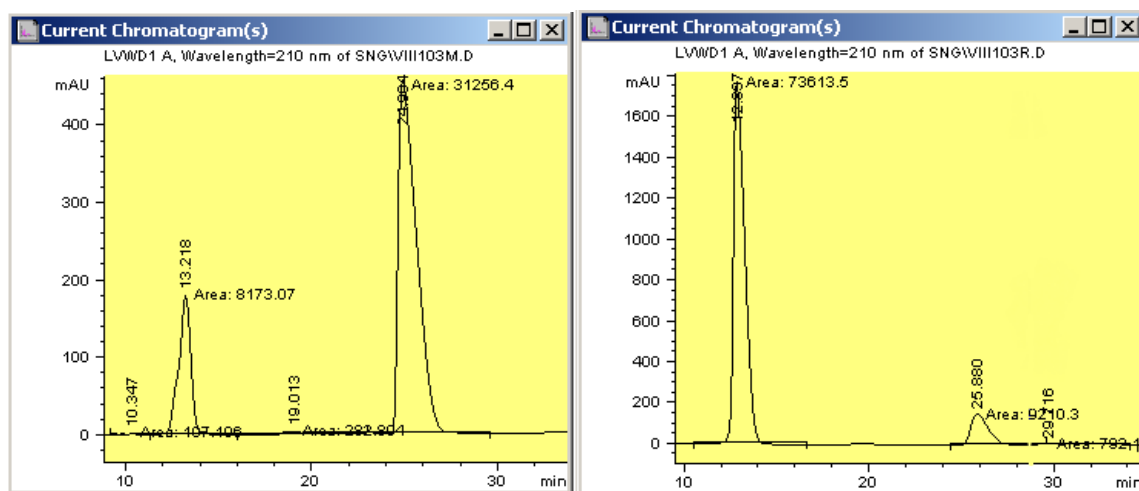

### Preparation of Reformatsky Reagent (S14):

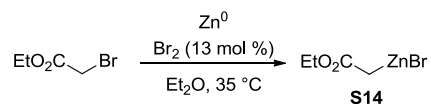

An oven-dried 100-mL round-bottomed flask equipped with a magnetic stir bar was charged with zinc dust (1.41 g, 21.6 mmol, 2 equiv) and diethyl ether (25 mL). The flask was fitted with a condenser and purged with nitrogen. Br<sub>2</sub> (0.07 mL, 1.4 mmol, 0.13 equiv) was added dropwise over 5 min with stirring (exotherm observed). The suspension was heated to reflux, and ethylbromoacetate (1.2 mL, 10.8 mmol, 1.0 equiv) was added dropwise over 15 min. The solution was stirred at this temperature for 4 h then cooled to RT. An aliquot was titrated with I<sub>2</sub>, typically reflecting concentrations of active reagent of 0.35-0.43 M (81-100% yield). The solution was stored under nitrogen at 0 °C for up to one week and titrated immediately prior to each subsequent use.

## General Procedure A for the Reformatsky Initiated Cascade Coupling of Silyl Glyoxylate and $\beta$ -Lactones Affording $\beta$ -hydroxyketones **3a-c**, **3h-k**

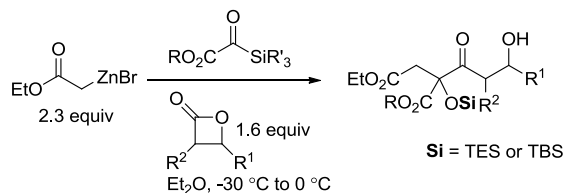

An oven-dried 20-mL scintillation vial equipped with magnetic stir bar was purged with nitrogen and a solution of Reformatsky reagent (0.38 M, 1.09 mL, 2.3 equiv) was added. The resulting suspension was diluted with diethyl ether (1.0 mL) and cooled to -30 °C in an acetone/dry ice bath (bath temperature, monitored with a thermocouple probe). A second oven-dried vial was charged with silyl glyoxylate **S11-S13** (0.18 mmol, 1.0 equiv) and  $\beta$ -lactone **S1-S8** (0.29 mmol, 1.6 equiv). The vial was purged with nitrogen, and diethyl ether (1.5 mL) was added. This solution was cooled and added to the solution of Reformatsky reagent. Additional diethyl ether (0.5 mL) was used to rinse the vial. The reaction was allowed to warm slowly in the acetone bath (generally over 30 min from -30 °C to 0 °C). Consumption of the silyl glyoxylate was generally observed by TLC analysis and disappearance of yellow color between -20 °C and -15 °C. The reaction was then held at 0 °C until judged complete by TLC analysis, generally 30 min. Saturated aqueous ammonium chloride (0.5 mL) was then added and the reaction was stirred until clear layers were observed. The organic layer was removed, and the aqueous layer was extracted with diethyl ether (3 x 1.0 mL). The combined organic extracts were washed with brine, dried with magnesium sulfate, and concentrated *in vacuo*. The crude product was purified via flash chromatography to give the desired product.

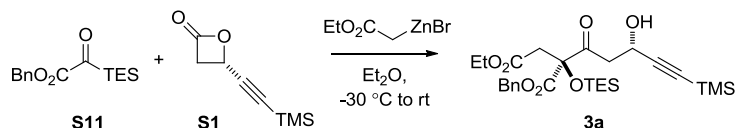

### (*S*)-1-benzyl-4-ethyl-2-((*S*)-3-hydroxy-5-(trimethylsilyl)pent-4-ynoyl)-2-

((triethylsilyl)oxy)succinate (**3b**): The title compound was prepared according to General Procedure A using silyl glyoxylate (**S11**, 50 mg, 0.18 mmol, 1.0 equiv) and (*S*)-4-((trimethylsilyl)ethynyl)oxetan-2-one (**S1**, 49 mg, 0.29 mmol, 1.6 equiv). Purification via flash chromatography (93.5:7.5 to 70:30 petroleum ether: diethyl ether) provided the desired product as a light yellow oil with > 20:1 diastereomeric ratio (59 mg, 61%). Analytical data:  $[\alpha]_D^{25.3}$  -5.30 (*c* 1.25, CHCl<sub>3</sub>); <sup>1</sup>H NMR (500 MHz, CDCl<sub>3</sub>):  $\delta$  7.36-7.31 (m, 5H), 5.17 (d, *J* = 12.0 Hz, 1H), 5.10 (d, *J* = 12.0 Hz, 1H), 4.87 (dd, *J* = 6.5, 4.5 Hz, 1H), 4.09 (q, *J* = 7.5 Hz, 2H), 3.47 (d, *J* = 17 Hz, 1H), 3.36 (dd, *J* = 18.5, 2.5 Hz, 1H), 3.12 (dd, *J* = 18.5, 9.0 Hz, 1H), 2.91 (d, *J* = 17.0 Hz, 2H), 1.22 (t, *J* = 7.0 Hz, 3H), 0.89 (t, *J* = 8.0 Hz, 9H), 0.56 (q, *J* = 8.0 Hz, 6H), 0.56 (s, 9H); <sup>13</sup>C NMR (100 MHz, CDCl<sub>3</sub>):  $\delta$  208.8, 169.3, 168.5, 134.4, 128.7, 128.6, 128.5, 104.8, 89.3, 83.7, 68.1, 61.1, 58.8, 46.0, 42.5, 14.0, 6.7, 5.7, -0.2; LRMS (ESI<sup>+</sup>) Calcd. for C<sub>27</sub>H<sub>42</sub>O<sub>7</sub>Si<sub>2</sub>+H, 535.3; Found, 535.3; IR (thin film, cm<sup>-1</sup>) 3515, 2958, 2911, 2878, 2176, 1738, 1456, 1373, 1343, 1250, 1181, 844, 699; TLC (80:20 Hex:EtOAc): R<sub>f</sub> = 0.42.

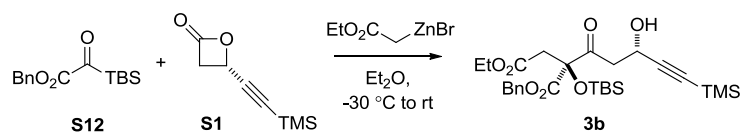

**(R)-1-benzyl 4-ethyl 2-((tert-butyldimethylsilyl)oxy)-2-((R)-3-hydroxy-5-(trimethylsilyl)pent-4-ynoyl)succinate (3b):** The title compound was prepared according to General Procedure A using silyl glyoxylate (**S12**, 50 mg, 0.18 mmol, 1.0 equiv) and (*S*)-4-((trimethylsilyl)ethynyl)oxetan-2-one (**S1**, 49 mg, 0.29 mmol, 1.6 equiv). Purification via flash chromatography (93.5:7.5 to 70:30 petroleum ether: diethyl ether) provided the desired product as a light yellow oil with > 20:1 diastereomeric ratio (67 mg, 70%). Analytical data:  $[\alpha]_D^{25.2} + 7.8$  (*c* 0.43, CHCl<sub>3</sub>); <sup>1</sup>H NMR (400 MHz, CDCl<sub>3</sub>): δ 7.38-7.27 (m, 5H), 5.17 (d, *J* = 12.0 Hz, 1H), 5.09 (d, *J* = 12.0 Hz, 1H), 4.86 (dd, *J* = 9.2, 4.8 Hz, 1H), 4.08 (q, *J* = 7.2 Hz, 2H), 3.46 (d, *J* = 16.8 Hz, 1H), 3.37 (dd, *J* = 18.8, 2.4 Hz, 1H), 3.13 (dd, *J* = 18.4, 8.8 Hz, 1H), 2.95 (d, *J* = 17.2, 1H), 2.91 (d, *J* = 4.4, 1H), 1.22 (t, *J* = 7.2 Hz, 3H), 0.86 (s, 9H), 0.15 (s, 9H), 0.04 (s, 3H), 0.02 (s, 3H); <sup>13</sup>C NMR (100 MHz, CDCl<sub>3</sub>): δ 208.8, 169.3, 168.3, 134.3, 128.7, 128.6, 128.5, 104.9, 89.3, 83.6, 68.1, 61.1, 58.7, 46.3, 42.2, 25.5, 18.2, 14.0, -0.3, -3.6, -4.2; LRMS (ESI<sup>+</sup>) Calcd. for C<sub>27</sub>H<sub>42</sub>O<sub>7</sub>Si<sub>2</sub>+Na, 557.3; Found, 557.2; IR (thin film, cm<sup>-1</sup>) 3433, 2844, 2386, 2100, 1646, 1558, 1541, 1456, 1250, 1013, 494; TLC (80:20 Hexanes:EtOAc): R<sub>f</sub> = 0.42.

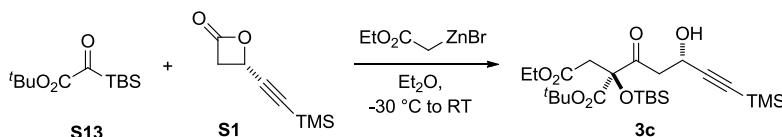

**1-tert-butyl 4-ethyl 2-((tert-butyldimethylsilyl)oxy)-2-(3-hydroxy-5-(trimethylsilyl)pent-4-ynoyl)succinate (3c):** The title compound was prepared according to General Procedure A using silyl glyoxylate (**S13**, 44 mg, 0.18 mmol, 1.0 equiv) and (*S*)-4-((trimethylsilyl)ethynyl)oxetan-2-one (**S1**, 49 mg, 0.29 mmol, 1.6 equiv). Purification via flash chromatography (93.5:7.5 hexanes:ethyl acetate) provided the desired product as a light yellow oil with > 20:1 diastereomeric ratio (31 mg, 34%). Analytical data: <sup>1</sup>H NMR (500 MHz, CDCl<sub>3</sub>): δ 4.88-4.86 (m, 1H), 4.08 (q, *J* = 7.0 Hz, 2H), 3.43 (d, *J* = 17.5 Hz, 1H), 3.39 (dd, *J* = 18.5, 2.5 Hz, 1H), 3.10 (dd, *J* = 18.5, 9.0 Hz, 1H), 3.02 (d, *J* = 5.0 Hz, 1H), 2.88 (d, *J* = 17.5 Hz, 1H), 1.44 (s, 9H), 1.23 (t, *J* = 7.5 Hz, 3H), 0.91 (s, 9H), 0.16 (s, 3H), 0.15 (s, 9H), 0.05 (s, 3H); <sup>13</sup>C NMR (125 MHz, CDCl<sub>3</sub>): δ 209.6, 169.6, 167.4, 105.0, 89.2, 84.2, 83.7, 61.0, 58.7, 46.1, 42.0, 27.7, 25.6, 18.3, 14.1, -0.2, -3.4, -3.7; LRMS (ESI<sup>+</sup>) Calcd. for C<sub>24</sub>H<sub>24</sub>O<sub>7</sub>Si<sub>2</sub>+Na, 523.3; Found, 523.2; IR (thin film, cm<sup>-1</sup>) 3432, 2959, 2858, 2359, 1737, 1641, 1371, 1251, 1157, 911, 841, 733; TLC(75:25 Hex:EtOAc): R<sub>f</sub> = 0.48.

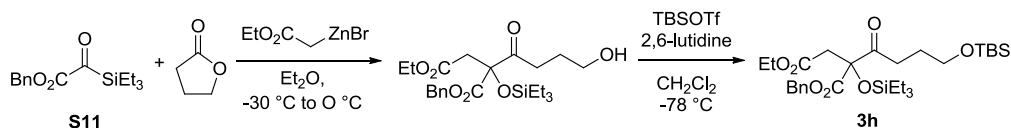

**1-benzyl 4-ethyl 2-(4-((tert-butyldimethylsilyl)oxy)butanoyl)-2-((triethylsilyl)oxy)succinate (3h):** The title compound was prepared according to General Procedure A using LiCl (38 mg, 0.9 mmol, 5 equiv), silyl glyoxylate (**S11**, 50 mg, 0.18 mmol, 1.0 equiv), and  $\gamma$ -butyrolactone (25 mg, 0.29 mmol, 1.6 equiv). The crude product was added to an oven-dried vial, which was purged with nitrogen. CH<sub>2</sub>Cl<sub>2</sub> (1.5 mL) was added, and the resulting solution was cooled to -78

°C. 2,6-lutidine (0.02 mL, 0.17 mmol, 2 equiv) was then added, followed by tert-butyltrimethylsilyl trifluoromethanesulfonate (0.02 mL, 0.09 mmol, 1.1 equiv). The reaction was allowed to stir for 20 min and was then quenched by the addition of an aqueous solution of HCl (1M, 0.5 mL). The layers were separated, and the organic layer was washed with brine, dried with magnesium sulfate, and concentrated *in vacuo*. Purification via flash chromatography (100:0 to 95:5 hexanes: ethyl acetate) provided the desired product as a light yellow oil (31 mg, 30%, 2 steps). Analytical data:  $^1\text{H NMR}$  (500 MHz,  $\text{CDCl}_3$ ):  $\delta$  7.35-7.29 (m, 5H), 5.18 (d,  $J = 12.5$  Hz, 1H), 5.09 (d,  $J = 12.5$  Hz, 1H), 4.07 (q,  $J = 7.5$  Hz, 2H), 3.60 (t,  $J = 6.5$  Hz, 2H), 3.41 (d,  $J = 16.5$  Hz, 1H), 2.99-2.95 (m, 1H), 2.91 (d,  $J = 16.5$  Hz, 1H), 2.91-2.75 (m, 1H), 1.77-1.74 (m, 2H), 1.21 (t,  $J = 7.0$  Hz, 3H), 0.90 (t,  $J = 7.0$  Hz, 9H), 0.88 (s, 9H), 0.57 (q,  $J = 7.5$  Hz, 6H), 0.03 (s, 6H);  $^{13}\text{C NMR}$  (125 MHz,  $\text{CDCl}_3$ ):  $\delta$  209.3, 169.3, 169.1, 134.7, 128.6, 128.5, 128.4, 83.8, 67.8, 62.2, 60.8, 42.5, 34.5, 26.4, 25.9, 18.2, 14.0, 6.8, 5.8, -5.4; **LRMS (ESI<sup>+</sup>)** Calcd. for  $\text{C}_{29}\text{H}_{50}\text{O}_7\text{Si}_2+\text{Na}$ , 589.3; Found, 589.3; **IR** (thin film,  $\text{cm}^{-1}$ ) 3433, 3054, 2121, 1641, 1422, 126, 895, 738, 704; **TLC**(75:25 Hex:EtOAc):  $R_f = 0.58$ .

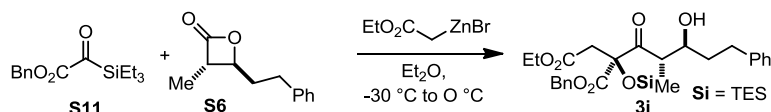

**1-benzyl 4-ethyl 2-3-hydroxy-2-methyl-5-phenylpentanoyl-2-((triethylsilyl)oxy)succinate (3i):** The title compound was prepared according to General Procedure A using silyl glyoxylate (**S11**, 50 mg, 0.18 mmol, 1.0 equiv) and *trans*-3-methyl-4-phenethyloxetan-2-one (**S6**, 55 mg, 0.29 mmol, 1.6 equiv). Purification via flash chromatography (50:50:0 to 0:100:0 to 0:95:5 hexanes:  $\text{CH}_2\text{Cl}_2$ : MeOH) provided the desired product as a light yellow oil with 5:1 diastereomeric ratio (56 mg, 56%). Analytical data:  $^1\text{H NMR}$  (400 MHz,  $\text{CDCl}_3$ ):  $\delta$  7.43-7.09 (m, 10H), 5.17 (d,  $J = 12.0$  Hz, 1H), 5.12 (d,  $J = 12.0$  Hz, 1H), 4.10 (q,  $J = 7.2$  Hz, 2H), 3.84-3.82 (m, 1H), 3.59-3.51 (m, 2H), 3.12 (d,  $J = 4.8$  Hz, 1H), 2.93-2.84 (m, 2H), 2.75-2.67 (m, 1H), 1.97-1.78 (m, 1H), 1.78-1.59 (m, 1H), 1.23 (t,  $J = 7.2$  Hz, 3H), 0.97 (d,  $J = 7.2$  Hz, 3H), 0.92 (t,  $J = 8.0$  Hz, 9H), 0.70-0.54 (m, 6H);  $^{13}\text{C NMR}$  (125 MHz,  $\text{CDCl}_3$ ):  $\delta$  212.2, 169.8, 169.2, 142.6, 134.4, 128.7, 128.6, 128.5, 125.6, 84.1, 72.2, 68.2, 61.3, 46.4, 42.9, 36.0, 31.6, 14.4, 14.0, 6.8, 5.9; **LRMS (ESI<sup>+</sup>)** Calcd. for  $\text{C}_{31}\text{H}_{44}\text{O}_7\text{Si}+\text{Na}$ , 579.3; Found, 579.2; **IR** (thin film,  $\text{cm}^{-1}$ ) 3528, 3028, 2855, 2912, 2877, 2733, 2359, 2249, 1950, 1740, 1455, 1373, 1343, 1211, 1020, 830, 737, 699; **TLC**(75:25 Hex:EtOAc):  $R_f = 0.42$ .

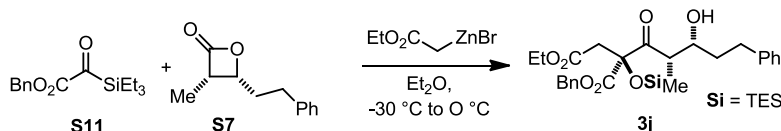

**1-benzyl 4-ethyl 2-3-hydroxy-2-methyl-5-phenylpentanoyl-2-((triethylsilyl)oxy)succinate (3j):** The title compound was prepared according to General Procedure A using silyl glyoxylate (**S11**, 50 mg, 0.18 mmol, 1.0 equiv) and *cis*-3-methyl-4-phenethyloxetan-2-one (**S7**, 55 mg, 0.29 mmol, 1.6 equiv). Purification via flash chromatography (50:50:0 to 0:100:0 to 0:95:5 hexanes:  $\text{CH}_2\text{Cl}_2$ : MeOH) provided the desired product as a light yellow oil with 5:1 diastereomeric ratio (79 mg, 79%). Analytical data:  $^1\text{H NMR}$  (500 MHz,  $\text{CDCl}_3$ ):  $\delta$  7.35-7.14 (m, 10H), 5.16 (d,  $J = 12.0$  Hz, 1H), 5.05 (d,  $J = 12.0$  Hz, 1H), 4.23 (dd,  $J = 10.0, 2.0$  Hz, 1H), 4.06 (q,  $J = 7.0$  Hz, 2H), 3.61 (d,  $J = 17.0$  Hz, 1H), 3.44-3.43 (m, 1H), 2.88-2.84 (m, 2H), 2.62-2.60 (m, 1H), 1.91-1.88 (m, 1H), 1.59-1.57 (m, 1H), 1.21 (t,  $J = 7.0$  Hz, 3H), 1.00 (d,  $J = 7.0$  Hz, 3H), 0.87 (t,  $J = 7.5$  Hz,

9H), 0.57-0.51 (m, 6H);  $^{13}\text{C}$  NMR (125 MHz,  $\text{CDCl}_3$ ):  $\delta$  213.2, 169.7, 168.9, 142.4, 134.3, 128.7, 128.6, 128.5, 128.3, 125.7, 84.2, 70.1, 68.1, 61.1, 45.9, 42.5, 36.0, 32.8, 14.1, 8.9, 6.7, 5.6; LRMS ( $\text{ESI}^+$ ) Calcd. for  $\text{C}_{31}\text{H}_{44}\text{O}_7\text{Si}+\text{Cs}$ , 689.2; Found, 689.1; IR (thin film,  $\text{cm}^{-1}$ ) 3440, 2955, 2877, 2247, 1735, 1642, 1455, 1374, 1343, 1210, 1022, 834, 733, 699; TLC(75:25 Hex:EtOAc):  $R_f$  = 0.34.

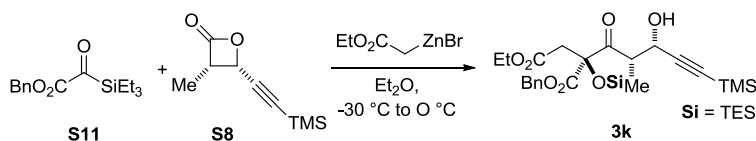

**1-benzyl 4-ethyl 2-3-hydroxy-2-methyl-5-(trimethylsilyl)pent-4-ynoyl)-2-((triethylsilyl)oxy)succinate (3k):** The title compound was prepared according to General Procedure A using silyl glyoxylate (**S11**, 50 mg, 0.18 mmol, 1.0 equiv) and (3S,4S)-3-methyl-4-((trimethylsilyl)ethynyl)oxetan-2-one (**S8**, 56 mg, 0.29 mmol, 1.6 equiv). Purification via flash chromatography (92.5:7.5 hexanes: ethyl acetate) provided the desired product as a light yellow oil with > 20:1 diastereomeric ratio (64 mg, 64%). Analytical data:  $^1\text{H}$  NMR (400 MHz,  $\text{CDCl}_3$ ):  $\delta$  7.37-7.29 (m, 5H), 5.19 (d,  $J$  = 12.0 Hz, 1H), 5.13-5.12 (m, 1H), 5.07 (d,  $J$  = 12.0 Hz, 1H), 4.09 (q,  $J$  = 7.2 Hz, 2H), 3.62-3.59 (m, 1H), 3.61 (d,  $J$  = 21.6 Hz, 1H), 3.19 (d,  $J$  = 4.4 Hz, 1H), 2.89 (d,  $J$  = 17.2 Hz, 1H), 1.23 (t,  $J$  = 7.2 Hz, 3H), 1.20 (d,  $J$  = 7.2 Hz, 3H), 0.92 (t,  $J$  = 8.0 Hz, 9H), 0.63-0.56 (m, 6H), 0.16 (s, 9H);  $^{13}\text{C}$  NMR (125 MHz,  $\text{CDCl}_3$ ):  $\delta$  211.7, 170.0, 168.6, 134.3, 128.8, 128.6, 104.2, 89.3, 84.2, 68.2, 63.3, 61.4, 47.2, 42.6, 14.0, 9.7, 6.7, 5.6, -0.2; LRMS ( $\text{ESI}^+$ ) Calcd. for  $\text{C}_{28}\text{H}_{44}\text{O}_7\text{Si}_2+\text{Na}$ , 571.3; Found, 571.2; IR (thin film,  $\text{cm}^{-1}$ ) 3543, 2959, 2878, 2361, 2178, 1731, 1374, 1212, 1020, 844; TLC(75:25 Hex:EtOAc):  $R_f$  = 0.45.

### General Procedure B for the Reformatsky Initiated Cascade Coupling of Silyl Glyoxylate and $\beta$ -Lactones Affording $\beta$ -hydroxyketones 3d-g

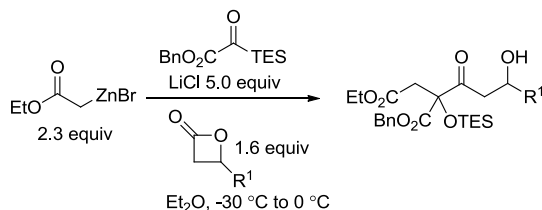

An oven-dried 20-mL scintillation vial equipped with magnetic stir bar was charged with LiCl (0.0-0.9 mmol, 0-5 equiv). The vial was purged with nitrogen, and a solution of Reformatsky reagent (0.38 M, 1.09 mL, 2.3 equiv) was added. The resulting suspension was diluted with diethyl ether (1.0 mL) and cooled to  $-30\text{ }^\circ\text{C}$  in an acetone/dry ice bath (bath temperature, monitored with a thermocouple probe). A second oven-dried vial was charged with silyl glyoxylate **S11** (0.18 mmol, 1.0 equiv) and  $\beta$ -lactone **S2-S5** (0.29 mmol, 1.6 equiv). The vial was purged with nitrogen, and diethyl ether (1.5 mL) was added. The resulting solution was cooled and added to the solution of Reformatsky reagent. Additional diethyl ether (0.5 mL) was used to rinse the vial. The reaction was allowed to warm slowly in the acetone bath (generally over 30 min from  $-30\text{ }^\circ\text{C}$  to  $0\text{ }^\circ\text{C}$ ). Consumption of the silyl glyoxylate was generally observed by TLC analysis and disappearance of yellow color between  $-30\text{ }^\circ\text{C}$  and  $-25\text{ }^\circ\text{C}$ . The reaction was then held at  $0\text{ }^\circ\text{C}$  until judged complete by TLC analysis, generally 30 min. Saturated aqueous



ammonium chloride (0.5 mL) was then added to quench the reaction, and it was stirred until clear layers were observed. The organic layer was removed, and the aqueous layer was extracted with diethyl ether (3x1.0 mL). The combined organic extracts were washed with brine, dried with magnesium sulfate, and concentrated *in vacuo*. The crude product was purified via flash chromatography to give the desired product.

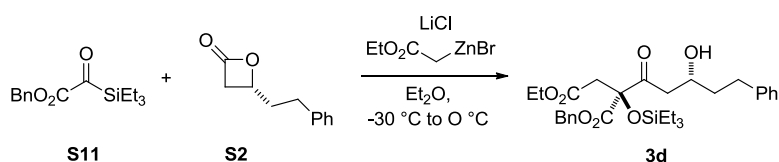

**1-benzyl 4-ethyl 2-(3-hydroxy-5-phenylpentanoyl)-2-((triethylsilyl)oxy)succinate (3d):** The title compound was prepared according to General Procedure B using LiCl (38 mg, 0.9 mmol, 5 equiv), silyl glyoxylate (**S11**, 50 mg, 0.18 mmol, 1.0 equiv), and (*S*)-4-phenethylloxetan-2-one (**S2**, 50 mg, 0.29 mmol, 1.6 equiv). Purification via flash chromatography (CH<sub>2</sub>Cl<sub>2</sub>) provided the desired product as a light yellow oil with > 20:1 diastereomeric ratio (63 mg, 65%). Analytical data: <sup>1</sup>H NMR (400 MHz, CDCl<sub>3</sub>): δ 7.36-7.16 (m, 10H), 5.19 (d, *J* = 12.0 Hz, 1H), 5.10 (d, *J* = 12.4 Hz, 1H), 4.13 (s, 1H), 4.08 (q, *J* = 7.2 Hz, 2H), 3.48 (d, *J* = 16.8 Hz, 1H), 3.17 (dd, *J* = 18.0, 1.6 Hz, 1H), 3.05 (d, *J* = 1.2 Hz, 1H), 2.90 (d, *J* = 16.8 Hz, 1H), 2.87-2.57 (m, 3H), 1.90-1.51 (m, 2H), 1.21 (t, *J* = 7.2 Hz, 3H), 0.88 (t, *J* = 8.0 Hz, 9H), 0.55 (q, *J* = 7.6 Hz, 6H); <sup>13</sup>C NMR (125 MHz, CDCl<sub>3</sub>): δ 210.7, 169.3, 168.7, 142.1, 134.3, 128.7, 128.6, 128.5, 128.4, 128.3, 125.7, 83.8, 68.1, 66.9, 61.0, 45.3, 42.4, 38.3, 31.9, 14.0, 6.7, 5.7; **LRMS (ESI<sup>+</sup>)** Calcd. for C<sub>30</sub>H<sub>42</sub>O<sub>7</sub>Si+Na, 565.3; Found, 565.2; **IR** (thin film, cm<sup>-1</sup>) 3459, 3028, 2955, 2877, 2360, 1737, 1455, 1373, 1213; **TLC**(75:25 Hex:EtOAc): R<sub>f</sub> = 0.44.

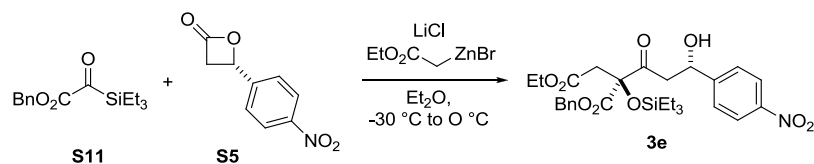

**1-benzyl 4-ethyl 2-(3-hydroxy-3-(4-nitrophenyl)propanoyl)-2-((triethylsilyl)oxy)succinate (3e):** The title compound was prepared according to General Procedure B using LiCl (38 mg, 0.9 mmol, 5 equiv), silyl glyoxylate (**S11**, 50 mg, 0.18 mmol, 1.0 equiv), and (*S*)-4-(4-nitrophenyl)oxetan-2-one (**S5**, 56 mg, 0.29 mmol, 1.6 equiv). Purification via flash chromatography (93.5:7.5 to 85:15 petroleum ether: diethyl ether) provided the desired product as a light yellow oil with > 20:1 diastereomeric ratio (35 mg, 35%). Analytical data: <sup>1</sup>H NMR (400 MHz, CDCl<sub>3</sub>): δ 8.19 (d, *J* = 8.8 Hz, 2H), 7.54 (d, *J* = 8.8 Hz, 2H), 7.39-7.30 (m, 5H), 5.30 (d, *J* = 9.6 Hz, 1H), 5.20 (d, *J* = 12.4 Hz, 1H), 5.10 (d, *J* = 12.0 Hz, 1H), 4.11 (q, *J* = 7.2 Hz, 2H), 3.57 (s, 1H), 3.54 (d, *J* = 13.2 Hz, 1H), 3.44 (dd, *J* = 18.0, 2.4 Hz, 1H), 2.95 (d, *J* = 17.2 Hz, 1H), 2.92 (d, *J* = 18.0 Hz, 1H), 1.25 (t, *J* = 7.2 Hz, 3H), 0.86 (t, *J* = 8.0 Hz, 9H), 0.58-0.52 (m, 6H); <sup>13</sup>C NMR (125 MHz, CDCl<sub>3</sub>): δ 210.1, 169.5, 168.5, 150.4, 147.1, 134.2, 128.8, 128.7, 128.5, 126.4, 123.6, 83.7, 69.0, 68.2, 61.2, 47.0, 42.5, 14.1, 6.7, 5.6; **LRMS (ESI<sup>+</sup>)** Calcd. for C<sub>28</sub>H<sub>37</sub>NO<sub>9</sub>Si+Na, 582.2; Found, 582.2; **IR** (thin film, cm<sup>-1</sup>) 3502, 2057, 2877, 2360, 2341, 1732, 1606, 1521, 1347, 1214, 1009, 854; **TLC**(75:25 Hex:EtOAc): R<sub>f</sub> = 0.36.

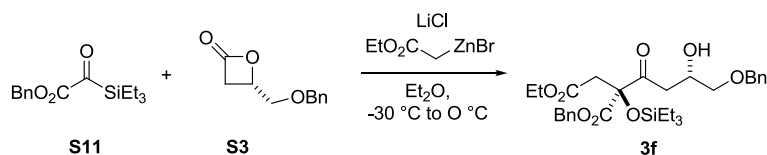

**1-benzyl 4-ethyl 2-(4-(benzyloxy)-3-hydroxybutanoyl)-2-((triethylsilyl)oxy)succinate (3f):** The title compound was prepared according to General Procedure B using LiCl (38 mg, 0.9 mmol, 5 equiv), silyl glyoxylate (**S11**, 50 mg, 0.18 mmol, 1.0 equiv), and (*S*)-4-((benzyloxy)methyl)oxetan-2-one (**S3**, 56 mg, 0.29 mmol, 1.6 equiv). Purification via flash chromatography (85:15 to 75:25 petroleum ether: diethyl ether) provided the desired product as a light yellow oil with > 20:1 diastereomeric ratio (49 mg, 49%). Analytical data:  $^1\text{H NMR}$  (400 MHz,  $\text{CDCl}_3$ ):  $\delta$  7.34-7.27 (m, 10H), 5.18 (d,  $J = 12.0$  Hz, 1H), 5.10 (d,  $J = 12.0$  Hz, 1H), 4.57 (s, 2H), 4.37-4.31 (m, 1H), 4.07 (q,  $J = 7.2$  Hz, 2H), 3.55-3.43 (m, 2H), 3.47 (d,  $J = 22.0$  Hz, 1H), 3.19 (dd,  $J = 20.0, 4.0$  Hz, 1H), 2.93 (d,  $J = 18.4$  Hz, 2H), 2.91 (d,  $J = 16.8$  Hz, 1H), 1.21 (t,  $J = 7.2$  Hz, 3H), 0.89 (t,  $J = 8.0$  Hz, 9H), 0.57 (q,  $J = 7.6$  Hz, 6H);  $^{13}\text{C NMR}$  (125 MHz,  $\text{CDCl}_3$ ):  $\delta$  209.4, 169.2, 168.7, 138.1, 134.4, 128.6, 128.5, 128.4, 128.3, 127.6, 127.5, 83.7, 73.3, 73.2, 68.0, 66.6, 60.9, 42.4, 41.8, 14.0, 6.7, 5.7; **LRMS (ESI<sup>+</sup>)** Calcd. for  $\text{C}_{30}\text{H}_{42}\text{O}_8\text{Si}+\text{Na}$ , 581.3; Found, 581.2; **IR** (thin film,  $\text{cm}^{-1}$ ) 3459, 3065, 3032, 2955, 2876, 2360, 1737, 1455, 1213, 1117, 1021, 736; **TLC**(75:25 Hex:EtOAc):  $R_f = 0.29$ .

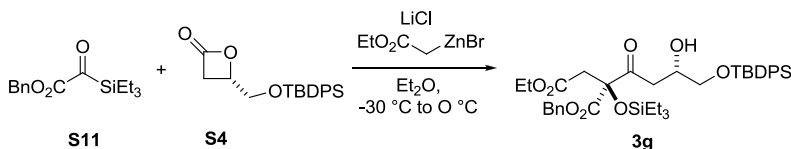

**1-benzyl 4-ethyl 2-(4-((tert-butyl)diphenylsilyl)oxy)-3-hydroxybutanoyl)-2-((triethylsilyl)oxy)succinate (3g):** The title compound was prepared according to General Procedure B using LiCl (38 mg, 0.9 mmol, 5 equiv), silyl glyoxylate (**S11**, 50 mg, 0.18 mmol, 1.0 equiv), and (*S*)-4-(((tert-butyl)diphenylsilyl)oxy)methyl)oxetan-2-one (**S4**, 98 mg, 0.29 mmol, 1.6 equiv). Purification via flash chromatography (93.5:7.5 to 85:15 petroleum ether: diethyl ether) provided the desired product as a light yellow oil with > 20:1 diastereomeric ratio (77 mg, 60%). Analytical data:  $^1\text{H NMR}$  (500 MHz,  $\text{CDCl}_3$ ):  $\delta$  7.68-7.66 (m, 4H), 7.49-7.29 (m, 11H), 5.18 (d,  $J = 12.0$  Hz, 1H), 5.10 (d,  $J = 12.0$  Hz, 1H), 4.27-4.25 (m, 1H), 4.08-4.03 (m, 2H), 3.66-3.65 (m, 2H), 3.47 (d,  $J = 17.0$  Hz, 1H), 3.25 (dd,  $J = 18.0, 3.0$  Hz, 1H), 2.97-2.88 (m, 3H), 1.19 (t,  $J = 7.0$  Hz, 3H), 1.06 (s, 9H), 0.89 (t,  $J = 8.0$  Hz, 9H), 0.59-0.55 (m, 6H);  $^{13}\text{C NMR}$  (125 MHz,  $\text{CDCl}_3$ ):  $\delta$  209.4, 169.2, 168.8, 135.6, 135.5, 134.5, 133.3, 133.2, 129.7, 128.6, 128.5, 128.4, 127.7, 127.6, 83.8, 68.0, 67.9, 67.0, 60.9, 42.4, 41.8, 26.8, 19.2, 14.1, 6.8, 5.7; **LRMS (ESI<sup>+</sup>)** Calcd. for  $\text{C}_{39}\text{H}_{54}\text{O}_8\text{Si}_2+\text{Na}$ , 729.3; Found, 729.3; **IR** (thin film,  $\text{cm}^{-1}$ ) 3458, 2957, 2877, 2360, 2341, 1738, 1456, 1428, 1213, 1113, 740, 700; **TLC**(75:25 Hex:EtOAc):  $R_f = 0.42$ .

## General Procedure C for the Reformatsky Initiated Cascade Coupling of Silyl Glyoxylate and $\beta$ -Lactams Affording $\beta$ -aminoketones 3l-m

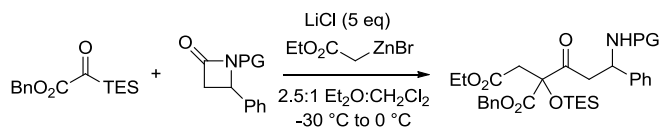

To an oven-dried 20-mL scintillation vial was added LiCl (38 mg, 0.9 mmol, 5 equiv). The vial was purged with nitrogen, and a solution of Reformatsky reagent (0.38 M, 1.09 mL, 2.3 equiv) was added. The resulting suspension was diluted with diethyl ether (1.0 mL) and cooled to -30 °C in an acetone/dry ice bath (bath temperature, monitored with a thermocouple probe). A second oven-dried vial was charged with silyl glyoxylate **S11** (50 mg, 0.18 mmol, 1.0 equiv) and purged with nitrogen, and diethyl ether (0.5 mL) was added. The resulting solution was added to the solution of Reformatsky reagent. The reaction was allowed to warm slowly in the acetone bath. Once consumption of the silyl glyoxylate was observed by TLC analysis and disappearance of yellow color, generally between -30 °C and -25 °C, a cooled solution of the  $\beta$ -Lactam (**S9-S10**, 0.29 mmol, 1.6 equiv) in CH<sub>2</sub>Cl<sub>2</sub> (1.0 mL) was added. The reaction was then allowed to warm to 0 °C, where it was held until judged complete by TLC analysis, generally 30 min. Saturated ammonium chloride (0.5 mL) was then added to quench the reaction, and it was stirred until clear layers were observed. The organic layer was removed, and the aqueous layer was extracted with diethyl ether (3x1.0 mL). The combined organic extracts were washed with brine, dried with magnesium sulfate, and concentrated *in vacuo*. The crude product was purified via flash chromatography to give the desired product.

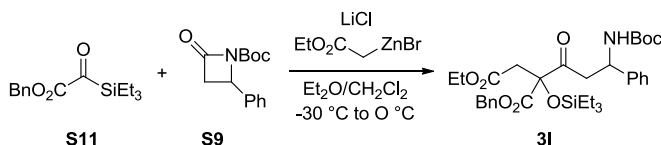

**1-benzyl 4-ethyl 2-(3-((*tert*-butoxycarbonyl)amino)-3-phenylpropanoyl)-2-((triethylsilyl)oxy)succinate (3l):** The title compound was prepared according to General Procedure C using LiCl (38 mg, 0.9 mmol, 5 equiv), silyl glyoxylate (**S11**, 50 mg, 0.18 mmol, 1.0 equiv), and *tert*-butyl 2-oxo-4-phenylazetidine-1-carboxylate (**S9**, 71 mg, 0.29 mmol, 1.6 equiv). Purification via flash chromatography (92.5:7.5 hexanes: ethyl acetate) provided the desired product as a light yellow oil (62 mg, 56%), which was a 1:1 mixture of separable diastereomers. Analytical data: <sup>1</sup>H NMR (400 MHz, CDCl<sub>3</sub>): (Diastereomer 1)  $\delta$  7.35-7.19 (m, 10H), 5.52 (br s, 1H), 5.11 (br s, 1H), 5.05-4.90 (m, 2H), 4.05 (q,  $J = 7.2$  Hz, 2H), 3.47-3.28 (m, 3H), 2.86 (d,  $J = 16.8$  Hz, 1H), 1.41 (s, 9H), 1.20 (t,  $J = 6.8$  Hz, 3H), 0.88 (t,  $J = 8.0$  Hz, 9H), 0.55-0.51 (m, 6H); (Diastereomer 2)  $\delta$  7.35-7.20 (m, 10H), 5.44 (br s, 1H), 5.10-5.02 (m, 2H), 4.10-4.08 (m, 2H), 3.54-3.41 (m, 2H), 3.05-2.93 (m, 1H), 2.87 (d,  $J = 20.0$  Hz, 1H), 1.38 (br s, 9H), 1.22 (t,  $J = 7.2$  Hz, 3H), 0.86 (t,  $J = 8.0$  Hz, 9H), 0.56-0.54 (m, 6H); <sup>13</sup>C NMR (125 MHz, CDCl<sub>3</sub>), major diastereomer:  $\delta$  207.0, 168.9, 168.6, 155.2, 134.4, 128.6, 128.5, 128.3, 126.8, 126.1, 83.8, 79.3, 68.0, 60.9, 50.1, 43.2, 42.0, 28.3, 14.0, 6.8, 5.7; LRMS (ESI<sup>+</sup>) Calcd. for C<sub>33</sub>H<sub>47</sub>NO<sub>8</sub>Si+Na, 636.3; Found, 636.3; IR (thin film, cm<sup>-1</sup>) 3417, 2959, 2877, 2086, 1641, 1495, 1455, 1367, 1343, 1167, 1018, 734, 698; TLC(75:25 Hex:EtOAc): R<sub>f</sub> = 0.34.

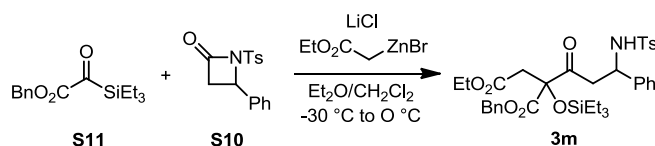

**1-benzyl 4-ethyl 2-(3-(4-methylphenylsulfonamido)-3-phenylpropanoyl)-2-((triethylsilyloxy)succinate (3m):** The title compound was prepared according to General Procedure C using LiCl (38 mg, 0.9 mmol, 5 equiv), silyl glyoxylate (**S11**, 50 mg, 0.18 mmol, 1.0 equiv), and 4-phenyl-1-tosylazetididin-2-one (**S10**, 87 mg, 0.29 mmol, 1.6 equiv). Purification via flash chromatography ( $\text{CH}_2\text{Cl}_2$ ) provided the desired product as a light yellow oil (64 mg, 53%), which was a 1:1 mixture of separable diastereomers. Analytical data:  $^1\text{H NMR}$  (400 MHz,  $\text{CDCl}_3$ ): (Diastereomer 1)  $\delta$  7.56 (d,  $J$  = 8.0 Hz, 2H), 7.33-7.31 (m, 3H), 7.22-7.12 (m, 9H), 5.56 (d,  $J$  = 6.4 Hz, 1H), 4.99 (d,  $J$  = 12.4 Hz, 1H), 4.94 (d,  $J$  = 12.0 Hz, 1H), 4.68 (q,  $J$  = 6.0 Hz, 1H), 4.03 (q,  $J$  = 6.8 Hz, 2H), 3.37 (dd,  $J$  = 18.8, 6.4 Hz, 1H), 3.31 (d,  $J$  = 16.8 Hz, 1H), 3.18 (dd,  $J$  = 18.8, 4.8 Hz, 1H), 2.81 (d,  $J$  = 16.8 Hz, 1H), 2.34 (s, 3H), 1.18 (t,  $J$  = 7.2 Hz, 3H), 0.82 (t,  $J$  = 7.6 Hz, 9H), 0.48 (q,  $J$  = 8.0 Hz, 6H); (Diastereomer 2)  $\delta$  7.52 (d,  $J$  = 8.4 Hz, 2H), 7.32-7.30 (m, 3H), 7.22-7.12 (m, 9H), 5.58 (d,  $J$  = 3.6 Hz, 1H), 5.05-4.95 (m, 2H), 4.71-4.66 (m, 1H), 4.10 (q,  $J$  = 6.8 Hz, 2H), 3.60 (dd,  $J$  = 18.8, 8.8 Hz, 1H), 3.38 (d,  $J$  = 17.2 Hz, 1H), 2.88-2.79 (m, 2H), 2.34 (s, 3H), 1.22 (t,  $J$  = 7.2 Hz, 3H), 0.81 (t,  $J$  = 7.6 Hz, 9H), 0.47 (q,  $J$  = 7.6 Hz, 6H);  $^{13}\text{C NMR}$  (100 MHz,  $\text{CDCl}_3$ ), mixture of diastereomers:  $\delta$  206.7, 206.5, 169.7, 169.0, 168.5, 142.9, 142.8, 140.7, 140.1, 134.4, 129.3, 129.1, 128.7, 128.6, 128.5, 128.3, 128.2, 127.4, 127.3, 126.9, 126.7, 83.8, 83.5, 68.1, 68.0, 61.4, 61.0, 53.7, 53.4, 44.8, 44.1, 42.8, 42.1, 21.4, 14.0, 6.7, 6.6, 5.8, 5.7; **LRMS (ESI<sup>+</sup>)** Calcd. for  $\text{C}_{35}\text{H}_{45}\text{NO}_8\text{SSi}+\text{Na}$ , 690.3; Found, 690.2; **IR** (thin film,  $\text{cm}^{-1}$ ) 3436, 3033, 2957, 2877, 1737, 1455, 1372, 1333, 1213, 1160, 1020, 739, 699, 666; **TLC**(75:25 Hex:EtOAc):  $R_f$  = 0.22.

### Stereochemical Analysis of $\beta$ -hydroxyketone Products:

#### Calculation of Diastereomeric Ratios:

A sample calculation of diastereomeric ratio is shown at right for **3i**. The relative integration of the methyl groups in the crude reaction mixture is shown to be 5:1.

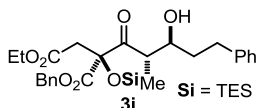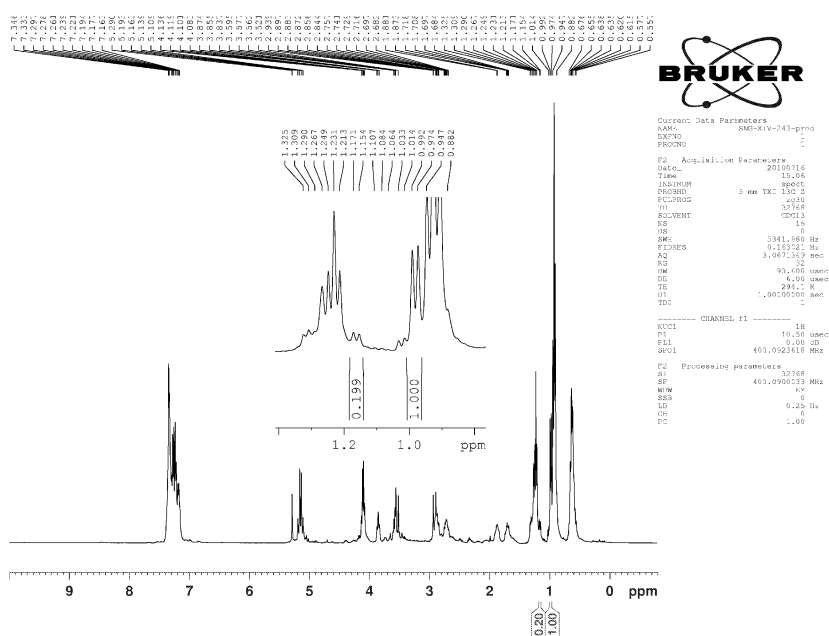

Determination of Relative Stereochemistry:

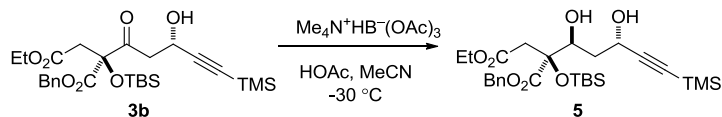

**(S)-1-benzyl 4-ethyl 2-((tert-butyldimethylsilyl)oxy)-2-((1S,3S)-1,3-dihydroxy-5-(trimethylsilyl) pent-4-yn-1-yl)succinate (5):** An oven-dried 20-mL scintillation vial equipped with a magnetic stir bar was charged with MeCN (1 mL), Me<sub>4</sub>NHB(OAc)<sub>3</sub> (147 mg, 0.56 mmol, 5.0 equiv), and dry HOAc (0.45 mL). The resulting solution was cooled to -35 °C in a Cryocool apparatus. A solution of ketone **3b** (46 mg, 0.112 mmol, 1.0 equiv) in MeCN (1 mL) was added to the reaction dropwise, and additional MeCN (0.5 mL) was used to rinse the vial. The reaction was allowed to warm to -25 °C and was maintained at the same temperature for 60 h. The reaction was quenched by the addition of a 25% saturated aqueous solution of sodium potassium tartrate (0.3 mL) and was allowed to warm slowly to room temperature. A saturated aqueous solution of NaHCO<sub>3</sub> was added until the pH of the reaction was neutral. The resulting suspension was extracted with CH<sub>2</sub>Cl<sub>2</sub>. The combined organic extracts were washed with saturated aqueous NaHCO<sub>3</sub>, dried with MgSO<sub>4</sub>, and concentrated *in vacuo* to afford a colorless oil. The material was purified via column chromatography, eluting with 80:20 hexanes:EtOAc, to give the title compound as a viscous light yellow oil with >25:1 diastereomeric ratio. Analytical data: <sup>1</sup>H NMR (400 MHz, CDCl<sub>3</sub>): δ 7.43-7.26 (m, 5H), 5.22 (d, *J* = 12.0 Hz, 1H), 5.18 (d, *J* = 12.4 Hz, 1H), 4.61 (br. s, 1H), 4.32 (dd, *J* = 9.2, 8.4 Hz, 1H), 4.06 (q, *J* = 7.2 Hz, 2H), 3.13 (d, *J* = 7.2 Hz, 1H), 3.01 (d, *J* = 7.2 Hz, 1H), 2.93 (d, *J* = 15.2 Hz, 1H), 2.86 (d, *J* = 15.2 Hz, 1H), 1.88 (ddd, *J* = 17.6, 14.4, 3.2 Hz, 1H), 1.67 (dd, *J* = 14.4, 6.4 Hz, 1H), 1.20 (t, *J* = 7.2 Hz, 3H) 0.85 (s, 9H), 0.16 (s, 9H), 0.15 (s, 3H), 0.09 (s, 3H); <sup>13</sup>C NMR (100 MHz, CDCl<sub>3</sub>): δ 172.0, 170.3, 135.3, 128.7, 128.6, 128.5, 106.2, 89.9, 80.7, 73.6, 67.6, 61.0, 60.9, 41.7, 37.8, 25.9, 18.7, 14.0, -0.1, -2.9, -3.1; LRMS (ESI<sup>+</sup>) Calcd. for C<sub>27</sub>H<sub>44</sub>O<sub>7</sub>Si<sub>2</sub>+Na, 559.2; Found, 559.2; IR (thin film, cm<sup>-1</sup>): 3853, 2089, 1647, 1541, 1457, 1250, 1175, 1031, 521, 509, 496; TLC(80:20 Hexanes:EtOAc): R<sub>f</sub> = 0.38.

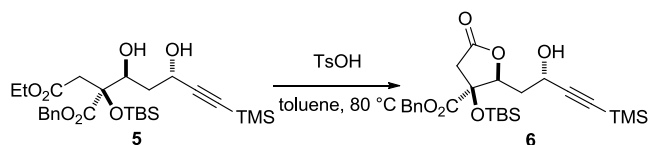

**(2S,3S)-benzyl 3-((tert-butyldimethylsilyl)oxy)-2-((S)-2-hydroxy-4-(trimethylsilyl)but-3-yn-1-yl)-5-oxotetrahydrofuran-3-carboxylate (6):** An oven-dried and cooled vial equipped with a magnetic stir bar was charged with diol **5** (12 mg, 0.022 mmol) and toluene (0.75 mL). TsOH (cat.) was added, and the vial was sealed with a Teflon-lined cap. The solution was heated to 80 °C in a sand bath for 1 h. After cooling to rt, the solvent was removed *in vacuo*, and the crude residue was purified via column chromatography, eluting with 80:20 hexanes:EtOAc. The title compound was obtained as a colorless oil (5 mg, 45%). Analytical data: [α]<sub>D</sub><sup>25.4</sup> -17.3 (*c* 0.23, CHCl<sub>3</sub>); <sup>1</sup>H NMR (500 MHz, CDCl<sub>3</sub>): δ 7.37 (br. s., 5H), 5.23 (d, *J* = 12.0 Hz, 1H), 5.18 (d, *J* = 12.0 Hz, 1H), 4.86 (dd, *J* = 9.5, 3.0 Hz, 1H), 4.53 (br. s., 1H), 3.30 (d, *J* = 17.5 Hz, 1H), 2.66 (d, *J* = 17.0 Hz, 1H), 2.187 (ddd, *J* = 14.5, 9.5, 3.5 Hz, 1H), 2.00 (ddd, *J* = 12.5, 9.0, 3.0 Hz, 1H), 1.92 (d, *J* = 5.5, 1H) 0.85 (s, 9H), 0.17 (s, 9H), 0.08 (s, 3H), 0.04 (s, 3H); <sup>13</sup>C NMR (100 MHz,

CDCl<sub>3</sub>):  $\delta$  172.7, 170.1, 128.8, 90.4, 83.3, 81.0, 68.3, 59.4, 42.6, 36.8, 25.6, -0.2, -3.5, -3.7; **LRMS (ESI<sup>+</sup>)** Calcd. for C<sub>25</sub>H<sub>38</sub>O<sub>6</sub>Si<sub>2</sub>+Na, 513.2; Found, 513.2; **IR** (thin film, cm<sup>-1</sup>) 3433, 3021, 2961, 2330, 2089, 1646, 1361, 1215, 775, 668; **TLC**(80:20 Hexanes:EtOAc): R<sub>f</sub> = 0.40.

Spectral analysis (NOESY) supported the structural assignment shown for **6**: A strong nOe was observed between the C2 methine C–H and the  $\alpha$ -C–H at C4 as well as between the C2 methine C–H and the CO<sub>2</sub>CH<sub>2</sub>Ph benzyl protons (interactions A and C, respectively). Additionally, an nOe was observed between the  $\beta$ -C–H at C4 and the methyl and *tert*-butyl substituents of the TBS ether, which suggested their relative *syn* orientation (interaction B).

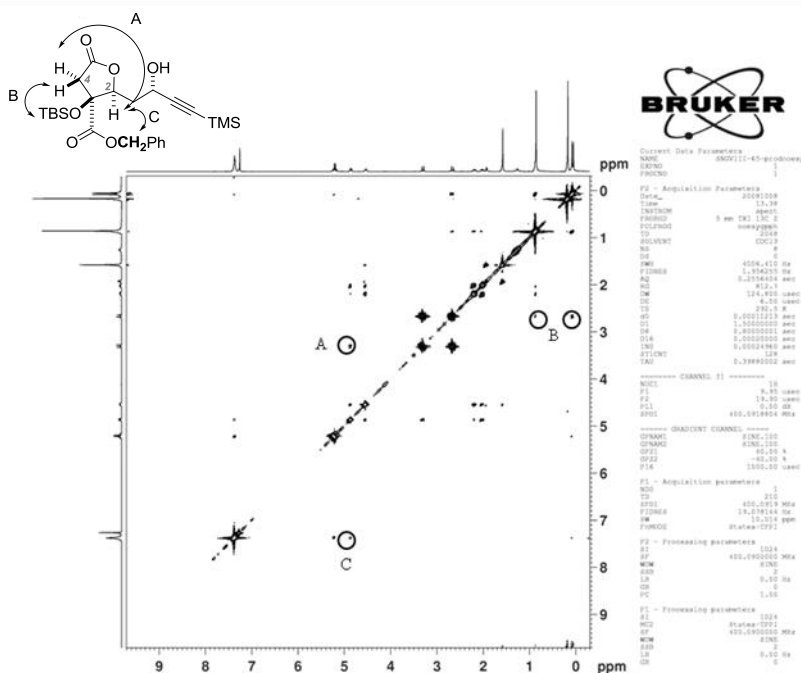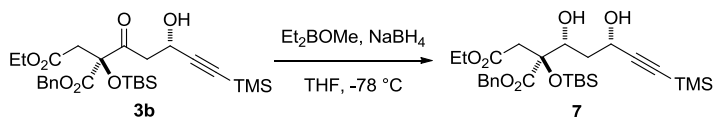

**(S)-1-benzyl 4-ethyl 2-((tert-butyl dimethylsilyl)oxy)-2-((1R,3S)-1,3-dihydroxy-5-(trimethylsilyl)pent-4-yn-1-yl)succinate (7)**: The title compound was prepared analogously to **7'** (*vide infra*). Yield = 95%, > 25:1 dr. Analytical data: <sup>1</sup>H NMR (400 MHz, CDCl<sub>3</sub>):  $\delta$  7.34 (br. s, 5H), 5.19 (s, 2H), 4.58 (br. s, 1H), 4.09-3.95 (m, 1H), 4.07 (t, J = 7.6 Hz, 2H), 2.96 (br. s, 1H), 2.72 (d J = 15.2 Hz, 1H), 1.95 (dd, J = 13.6, 6.4 Hz, 1H), 1.77 (dd, J = 17.6, 10 Hz, 1H), 1.19 (t, J = 7.2 Hz, 3H), 0.85 (s, 9H), 0.17 (s, 3H), 0.14 (s, 9H), 0.10 (s, 3H); <sup>13</sup>C NMR (100 MHz, CDCl<sub>3</sub>):  $\delta$  172.0, 169.8, 135.0, 128.5, 128.5, 128.4, 105.7, 89.7, 80.8, 75.2, 67.5, 61.7, 60.8, 41.3, 38.7, 25.9, 18.7, 13.9, -0.3, -2.9, -3.2; **LRMS (ESI<sup>+</sup>)** Calcd. for C<sub>27</sub>H<sub>44</sub>O<sub>7</sub>Si<sub>2</sub>+Na, 559.3; Found, 559.2; **IR** (thin film, cm<sup>-1</sup>): 3436, 2957, 2856, 2360, 1739, 1637, 1457, 1372, 1251, 1188, 1112, 840; **TLC**(80:20 Hexanes:EtOAc): R<sub>f</sub> = 0.38.

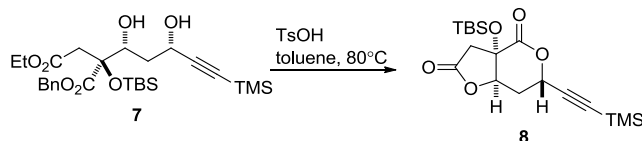

**(3a*S*,6*S*,7a*R*)-3a-((*tert*-butyldimethylsilyl)oxy)-6-((trimethylsilyl)ethynyl)tetrahydro-2H-furo[3,2-*c*]pyran-2,4(6H)-dione (**8**):** An oven-dried and cooled vial equipped with a magnetic stir bar was charged with diol **7** (15 mg, 0.0275 mmol) and toluene (1 mL). TsOH (cat.) was added, and the vial was sealed with a Teflon cap. The solution was heated to 80 °C in a sand bath for 1 h. After cooling to rt, the solvent was removed *in vacuo*, and the crude residue was purified via column chromatography, eluting with 10:90 to 20:80 EtOAc: hexanes. The title compound was obtained as a colorless oil (6.4 mg, 60%). Analytical data:  $[\alpha]_D^{25.1}$  -13.1 (*c* 0.15, CHCl<sub>3</sub>); <sup>1</sup>H NMR (400 MHz, CDCl<sub>3</sub>): δ 5.15 (dd, *J* = 7.2, 3.6 Hz, 1H), 4.89 (dd, *J* = 6.8, 4.8 Hz, 1H), 2.94 (d, *J* = 18.4 Hz, 1H), 2.81 (d, *J* = 18.0 Hz, 1H), 2.48 (ddd, *J* = 12.4, 7.6, 4.8 Hz, 1H), 2.26 (ddd, *J* = 10.4, 7.2, 3.6 Hz, 1H), 0.88 (s, 9H), 0.26 (s, 3H), 0.19 (s, 9H), 0.14 (s, 3H); <sup>13</sup>C NMR (100 MHz, CDCl<sub>3</sub>): δ 171.6, 169.1, 98.5, 95.1, 82.6, 76.3, 65.8, 42.0, 34.0, 25.5, 18.1, -0.5, -3.5, -3.7; LRMS (ESI<sup>+</sup>) Calcd. for C<sub>18</sub>H<sub>30</sub>O<sub>5</sub>Si<sub>2</sub>+Na, 405.2; Found, 405.2; IR (thin film, cm<sup>-1</sup>) 3433, 3019, 1645, 1215, 771, 669; TLC(80:20 Hexanes:EtOAc): R<sub>f</sub> = 0.50.

Spectral analysis (HMBC, NOESY) supported the stereochemical assignment shown for compound **8**: The NOESY spectrum shows an nOe between the methine C–H at C6 and the β-C–H at C3 (interaction A), which suggests their orientation on the concave face of the bicycle. Additionally, both the α-C3 C–H proton on the convex face of the bicycle and the C7a methine C–H show an nOe with the *tert*-butyl group of the TBS ether, which suggests their mutual orientation on the convex face of the molecule (interactions D and C). The assignment of the C7a and C6 methine C–H protons was a result of the observation of a mutual correlation between the latter and the TMS methyl groups with the distal alkyne carbon (indicated by interactions E and F) in the HMBC spectrum.

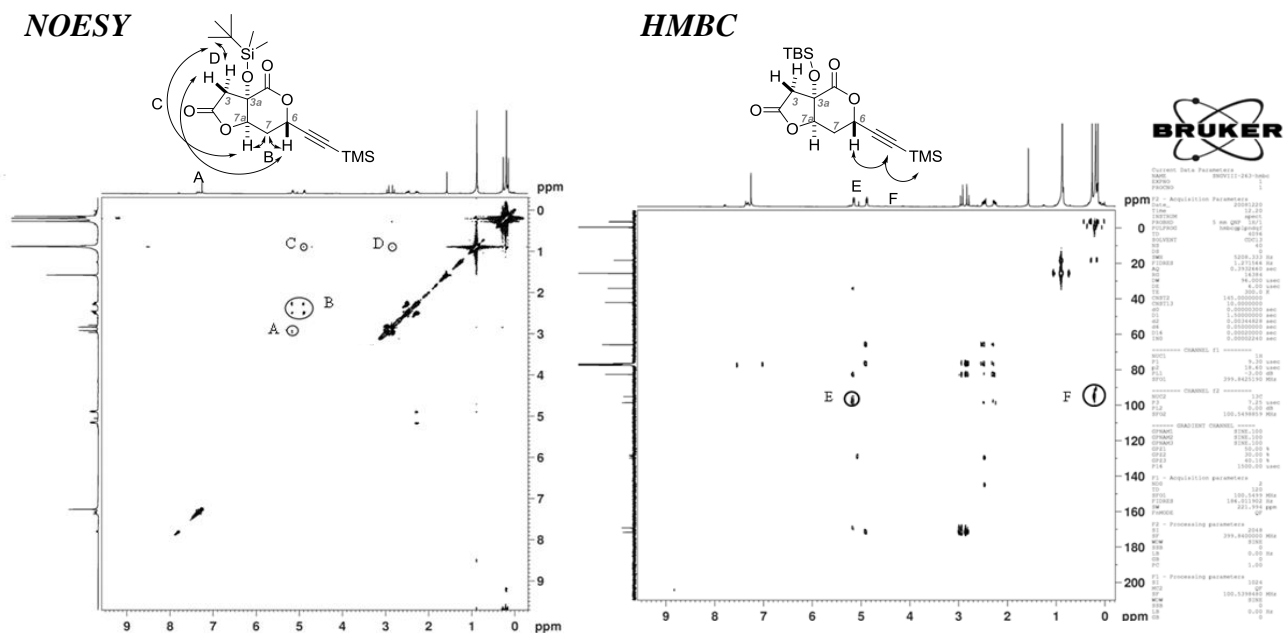

### Determination of Relative Stereochemistry for Coupling Product **3i**:

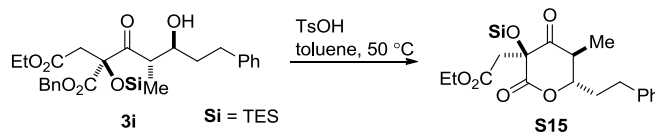

**Ethyl 2-((3*S*,5*S*,6*S*)-5-methyl-2,4-dioxo-6-phenethyl-3-((triethylsilyloxy)tetrahydro-2H-pyran-3-yl)acetate (**S15**):** An oven-dried and cooled vial equipped with a magnetic stir bar was charged with **3i** (26 mg, 0.0467 mmol) and toluene (1 mL). TsOH (cat.) was added, and the vial was sealed with a Teflon-lined cap. The solution was heated to 50 °C in an oil bath for 3 h. After cooling to rt, the solvent was removed *in vacuo*, and the crude residue was purified via column chromatography, eluting with 7.5:92.5 EtOAc: hexanes. The title compound was obtained as a pale yellow oil (14 mg, 67%). Analytical data: <sup>1</sup>H NMR (400 MHz, CDCl<sub>3</sub>): δ 7.33-7.19 (m, 5H), 4.66-4.60 (m, 1H), 4.11-4.03 (m, 2H), 3.29 (d, *J* = 16.4 Hz, 1H), 3.24 (d, *J* = 16.0 Hz, 1H), 3.05-2.95 (m, 1H), 2.88-2.78 (m, 1H), 2.77-2.67 (m, 1H), 2.21-2.11 (m, 1H), 2.05-1.94 (m, 1H), 1.23 (t, *J* = 7.2 Hz, 3H), 1.19 (d, *J* = 6.8 Hz, 3H), 0.88 (t, *J* = 8.0 Hz, 9H), 0.59 (q, *J* = 8.0 Hz, 6H); <sup>13</sup>C NMR (125 MHz, CDCl<sub>3</sub>): δ 202.2, 170.7, 169.4, 140.7, 128.6, 128.5, 126.2, 75.4, 61.2, 45.6, 38.0, 34.4, 30.4, 14.0, 10.8, 6.6, 5.9; **LRMS (ESI<sup>+</sup>)** Calcd. for C<sub>18</sub>H<sub>21</sub>O<sub>6</sub>Si+Cs, 581.1; Found, 581.1; **IR** (thin film, cm<sup>-1</sup>) 3433, 2959, 2878, 2092, 1760, 1726, 1637, 1456, 1373, 1339, 1309, 1212, 1103, 1027, 842, 700; **TLC**(75:25 Hexanes:EtOAc): R<sub>f</sub> = 0.60.

Spectral analysis (COSY, NOESY) supported the stereochemical assignment shown for compound **S15**. The identities of the two methine protons (C5 and C6) were determined through correlation spectroscopy. A strong correlation was observed between the methyl group and methine proton at C5 (interaction A), while the methine proton at C6 showed a strong correlation with the methylene group of the hydrocinnamyl substituent (interaction B). The relative stereochemistry was assigned through NOESY analysis, which showed nOe's between the triethylsilyloxy group at C3 and both the methyl group at C5 and the methine proton at C6 (interactions C and E). A third nOe was observed between the C5 methyl group and the methine proton at C6, suggesting that the trans relationship of the original β-lactone substituents (interaction D) was preserved under the reaction conditions.

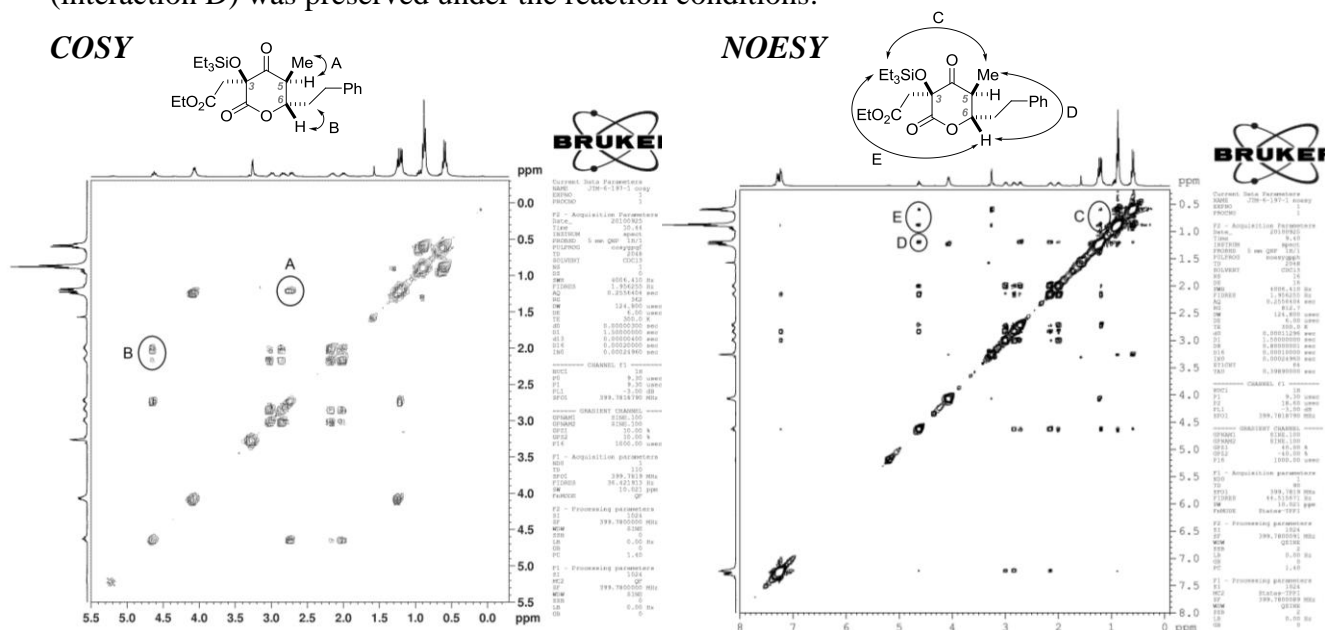



## Diester Functionalization of $\beta$ -hydroxyketone Products:

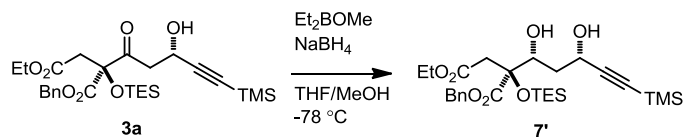

**(S)-1-benzyl 4-ethyl 2-((1R,3S)-1,3-dihydroxy-5-(trimethylsilyl)pent-4-yn-1-yl)-2-((triethylsilyl)oxy)succinate (7')**: A flame-dried and  $N_2$ -purged 500-mL round-bottomed flask was charged with ketone **3a** (6.0 g, 11.2 mmol, 1.0 equiv). Tetrahydrofuran (200 mL) and methanol (50 mL) were added. The solution was cooled to  $-78\text{ }^\circ\text{C}$  (acetone/dry ice), and diethylmethoxyborane (1 M in tetrahydrofuran, 14.6 mL, 14.6 mmol) was added dropwise. After stirring for 45 minutes at  $-78\text{ }^\circ\text{C}$ , sodium borohydride (1.27 g, 33.7 mmol, 3.0 equiv) was added in one portion and the reaction was maintained at the same temperature. Once TLC analysis indicated complete consumption of the starting material (3.5 h), the reaction was quenched with acetic acid (9.0 mL). After warming to room temperature, the reaction was stirred for 1.5 h and was then concentrated *in vacuo*. Methanol (30 mL) was added, and the solution was again concentrated *in vacuo*; this procedure was repeated with four additional portions of methanol (30 mL). The residue was partitioned between ethyl acetate and saturated sodium bicarbonate, and the organic layer was washed with saturated sodium bicarbonate, water, and brine. The organic extracts were dried with magnesium sulfate and concentrated *in vacuo* to give a light yellow viscous oil (5.7 g, 95%) that was used without additional purification. Analytical data:  $[\alpha]_D^{25.2} - 1.74$  (*c* 1.25,  $\text{CHCl}_3$ );  $^1\text{H NMR}$  (500 MHz,  $\text{CDCl}_3$ ):  $\delta$  7.36-7.33 (m, 5H), 5.20 (s, 2H), 4.60 (br. s., 1H), 4.10-3.99 (m, 3H), 3.05 (d,  $J = 6.0$  Hz, 1H), 2.87 (d,  $J = 4.0$  Hz, 1H), 2.83 (d,  $J = 9.0$  Hz, 2H), 1.98 (dd,  $J = 13.5, 5.5$  Hz, 1H), (dd,  $J = 10.5, 2.5$  Hz, 1H), 1.21 (t,  $J = 7.0$  Hz, 3H), 0.91 (t,  $J = 8.0$  Hz, 9H), 0.67-0.62 (m, 6H), 0.15 (s, 9H);  $^{13}\text{C NMR}$  (100 MHz,  $\text{CDCl}_3$ ):  $\delta$  172.1, 169.9, 135.0, 128.6, 128.5, 128.4, 105.6, 89.7, 80.6, 75.3, 67.6, 62.1, 60.9, 41.2, 38.7, 14.0, 7.1, 6.4, -0.2; **LRMS (ESI<sup>+</sup>)** Calcd. for  $\text{C}_{27}\text{H}_{44}\text{O}_7\text{Si}_2+\text{Na}$ , 559.3; Found, 559.3; **IR** (thin film,  $\text{cm}^{-1}$ ) 3470, 2957, 2876, 2172, 1740, 1185, 1022, 844, 734; **TLC**(80:20 Hex:EtOAc):  $R_f = 0.21$ .

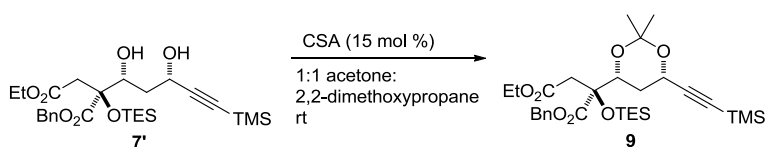

**(S)-1-benzyl-4-ethyl-2-((4R,6S)-2,2-dimethyl-6-((trimethylsilyl)ethynyl)-1,3-dioxan-4-yl)-2-((triethylsilyl)oxy)succinate (9)** A 500-mL round-bottomed flask was charged with diol **7'** (11.0 g, 20.6 mmol, 1.0 equiv), acetone (250 mL) and 2,2-dimethoxypropane (250 mL). CSA (0.716 g, 3.09 mmol, 0.15 equiv) was added, and the reaction was allowed to stir at room temperature for 16 h. The reaction was quenched by the addition of 0.5 mL of triethylamine and was concentrated *in vacuo*. The residue was purified via column chromatography (90:10 hexanes: ethyl acetate) to give the product as a white solid (8.6 g, 73%). Analytical data:  $[\alpha]_D^{25.4} - 13.96$  (*c* 1.5,  $\text{CHCl}_3$ ); melting point:  $75\text{--}79\text{ }^\circ\text{C}$ ;  $^1\text{H NMR}$  (500 MHz,  $\text{CDCl}_3$ ):  $\delta$  7.35-7.33 (m, 5H), 5.30 (d,  $J = 12.5$  Hz, 1H), 5.05 (d,  $J = 12.0$  Hz, 1H), 4.62 (dd,  $J = 12.0, 2.5$  Hz, 1H), 4.12-4.06 (m, 3H), 2.74 (d,  $J = 14.5$  Hz, 1H), 2.65 (d,  $J = 14.0$  Hz, 1H), 1.88-1.60 (m, 2H), 1.33 (s, 3H), 1.23 (t,  $J = 7.5$  Hz, 3H), 1.19 (s, 3H), 0.95 (t,  $J = 16.0$  Hz, 9H), 0.74-0.65 (m, 6H), 0.17 (s, 9H);  $^{13}\text{C NMR}$  (100 MHz,  $\text{CDCl}_3$ ):  $\delta$  171.6, 169.4, 135.6, 128.7, 128.4, 128.3, 103.7, 99.6, 89.4,

80.2, 72.9, 67.0, 60.7, 60.5, 41.9, 30.8, 29.5, 18.8, 14.0, 7.3, 6.7, -0.21; **LRMS (ESI<sup>+</sup>)** Calcd. for C<sub>30</sub>H<sub>48</sub>O<sub>7</sub>Si<sub>2</sub>+Na, 599.3; Found, 599.3; **IR** (thin film, cm<sup>-1</sup>) 2956, 2875, 2181, 1739, 1457, 1379, 1251, 1163, 844, 734; **TLC**(80:20 Hex:EtOAc): R<sub>f</sub> = 0.30.

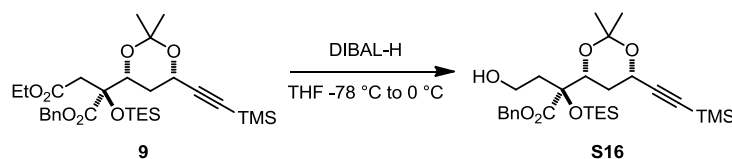

**Benzyl 2-(2,2-dimethyl-6-((trimethylsilyl)ethynyl)-1,3-dioxan-4-yl)-4-hydroxy-2-((triethylsilyl)oxy)butanoate (S16):** An oven-dried and cooled 20-mL scintillation vial was charged with diester **9** (95 mg, 0.164 mmol, 1.0 equiv) and THF (4 mL). The resulting solution was cooled to -78 °C, and a solution of DIBAL-H (1.46 mL, 0.562 M in THF, 0.820 mmol, 5.0 equiv) was added dropwise. When the addition of DIBAL-H was complete, the reaction was maintained at -78 °C for 20 min then was allowed to warm to 0 °C for 30 min. The reaction was quenched by the addition of saturated aqueous sodium potassium tartrate (3 mL) and was diluted with Et<sub>2</sub>O (5 mL). The resulting biphasic mixture was stirred vigorously until clear layers were observed. Additional diethyl ether was added, and the layers were separated. The aqueous layer was extracted with Et<sub>2</sub>O (3x 5 mL), and combined organic extracts were washed with water and brine, dried (MgSO<sub>4</sub>), and concentrated *in vacuo* to give a light yellow oil, which was purified via column chromatography, eluting with 70:30 hexanes: EtOAc, to afford the title compound as a colorless oil (52 mg, 60%). Analytical data: **<sup>1</sup>H NMR** (500 MHz, CDCl<sub>3</sub>): δ 7.38-7.33 (m, 5H), 5.32 (d, *J* = 12.0 Hz, 1H), 4.99 (d, *J* = 12.0 Hz, 1H), 4.63 (dd, *J* = 12.0, 3.0 Hz, 1H), 4.11 (dd, *J* = 12.0, 2.5 Hz, 1H), 3.71-3.68 (m, 2H), 1.92-1.87 (m, 4H), 1.67 (dt, *J* = 13.0, 2.5 Hz, 1H), 1.32 (s, 3H), 1.19 (s, 3H), 0.97 (t, *J* = 8.0 Hz, 9H), 0.81-0.75 (m, 6H), 0.16 (s, 9H); **<sup>13</sup>C NMR** (125 MHz, CDCl<sub>3</sub>): δ 173.1, 135.5, 128.8, 128.5, 128.4, 103.7, 99.5, 89.4, 81.7, 73.0, 67.0, 60.5, 58.7, 38.5, 30.6, 29.4, 18.8, 7.3, 6.8, -0.2; **LRMS (ESI<sup>+</sup>)** Calcd. for C<sub>28</sub>H<sub>48</sub>O<sub>6</sub>Si<sub>2</sub>+Cs, 667.2; Found, 667.2; **IR** (thin film, cm<sup>-1</sup>) 3432, 2958, 2911, 2875, 2248, 2181, 1752, 1641, 1457, 1381, 1251, 1194, 1160, 1112, 909, 845, 732; **TLC**(75:25 Hex:EtOAc): R<sub>f</sub> = 0.23.

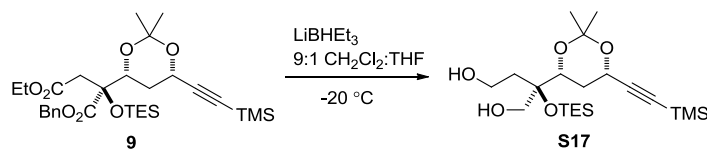

**(R)-2-((4R,6S)-2,2-dimethyl-6-((trimethylsilyl)ethynyl)-1,3-dioxan-4-yl)-2-((triethylsilyl)oxy)butane-1,4-diol (S17):** A flame-dried and cooled 1L round-bottomed flask was charged with acetonide **9** (5.0 g, 8.7 mmol, 1.0 equiv). The flask was purged with N<sub>2</sub>, and CH<sub>2</sub>Cl<sub>2</sub> (500 mL) was added. The solution was cooled to -30 °C, and lithium triethylborohydride (1M in THF, 57 mmol, 57 mL) was added dropwise over 15 min via syringe pump. The reaction temperature was maintained for 2 h, at which point the temperature was increased to -20 °C for 1 h. The reaction was quenched by the dropwise addition of HOAc (8 mL) and MeOH (30 mL). The resulting suspension was warmed to room temperature and concentrated *in vacuo*, keeping the bath temperature at or below 30 °C to avoid migration of the triethylsilyl group. The residue was redissolved in MeOH (30 mL) and concentrated *in vacuo* an additional four times. The residue was partitioned between ethyl acetate and saturated aqueous sodium bicarbonate, and the organic extracts were washed successively with saturated sodium bicarbonate (x2), water, and

brine. The combined organic extracts were dried with sodium sulfate and concentrated *in vacuo*. The resulting crude oil was purified via column chromatography, eluting with a gradient of 80:20 to 70:30 hexanes: ethyl acetate to give the desired diol as a white solid (2.1 g, 56%). Analytical data:  $[\alpha]_D^{25.2}$  -2.82 (*c* 1.8, CHCl<sub>3</sub>); <sup>1</sup>H NMR (500 MHz, CDCl<sub>3</sub>): δ 4.67 (dd, *J* = 11.5, 2.5 Hz, 1H), 3.93 (dd, *J* = 11.5, 2.5 Hz, 1H), 3.86-3.73 (m, 3H), 3.50 (dd, *J* = 11.0, 3.0 Hz, 1H), 2.83 (s, 1H), 2.65 (s, 1H), 1.98-1.70 (m, 4H), 1.46 (s, 6H), 0.95 (t, *J* = 3.5 Hz, 9H), 0.74-0.65 (dq, *J* = 16.0, 3.0 Hz 6H), 0.17 (s, 9H); <sup>13</sup>C NMR (100 MHz, CDCl<sub>3</sub>): δ 103.7, 99.6, 89.6, 78.0, 73.2, 65.6, 60.9, 58.3, 37.7, 31.3, 29.9, 19.2, 7.1, 6.8, -0.2; LRMS (ESI<sup>+</sup>) Calcd. for C<sub>21</sub>H<sub>42</sub>O<sub>5</sub>Si<sub>2</sub>+Na, 453.3; Found, 453.4; IR (thin film, cm<sup>-1</sup>) 3389, 2956, 2876, 2183, 1739, 1460, 1380, 1250, 1161, 1055, 844, 733; TLC(75:25 Hex:EtOAc): R<sub>f</sub> = 0.09.

### Synthesis of Leustroducsin B Core:

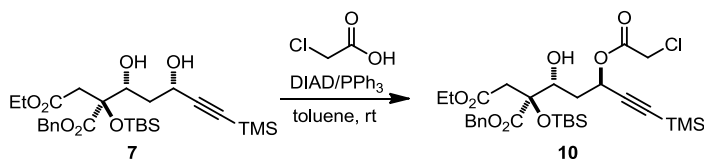

**(S)-1-benzyl 4-ethyl 2-((*tert*-butyldimethylsilyl)oxy)-2-((1*R*,3*R*)-3-(2-chloroacetoxy)-1-hydroxy-5-(trimethylsilyl)pent-4-yn-1-yl)succinate (10):** An oven-dried and cooled 20-mL scintillation vial equipped with magnetic stir bar was charged with diol **7** (37 mg, 0.068 mmol, 1.0 equiv), PPh<sub>3</sub> (55 mg, 0.211 mmol, 3.1 equiv), and chloroacetic acid (12 mg, 0.127 mmol, 1.9 equiv). The vial was purged with N<sub>2</sub>, and toluene (2 mL) was added. DIAD (0.031 mL, 36 mg, 0.204 mmol, 3.0 equiv) was added dropwise, and the resulting solution was stirred at rt for 30 min, at which point TLC analysis indicated complete consumption of the starting material (R<sub>f</sub> = 0.24, 80:20 hexanes:EtOAc). The reaction was loaded directly onto an SiO<sub>2</sub> plug and eluted with 100:0 to 90:10 hexanes:EtOAc to afford the desired chloroacetate (**10**) as a colorless oil (27 mg, 65%). Analytical data: <sup>1</sup>H NMR (400 MHz, CDCl<sub>3</sub>): δ 7.35 (br. s., 5H), 5.62 (d, *J* = 7.6 Hz, 1H), 5.21 (br. s., 2H), 4.05 (br. s., 4H), 3.84 (dd, *J* = 16.8, 8.4 Hz, 1H), 2.92 (d, *J* = 15.6 Hz, 1H), 2.73 (d, *J* = 15.6 Hz, 1H), 2.44 (d, *J* = 7.2 Hz, 1H), 2.15 (dd, 23.6, 13.6 Hz, 1H), 1.82 (dd, *J* = 23.6, 11.6 Hz, 1H), 1.20 (t, *J* = 6.8 Hz, 3H), 0.85 (s, 9H), 0.16 (s, 9H), 0.16 (s, 3H; 2 coincident resonances), 0.10 (s, 3H); <sup>13</sup>C NMR (100 MHz, CDCl<sub>3</sub>): δ 171.9, 169.7, 116.2, 135.1, 128.7, 128.6, 128.5, 101.4, 91.7, 80.9, 72.3, 67.6, 63.4, 60.9, 41.6, 40.7, 37.1, 26.0, 18.8, 14.0, -0.3, -2.9, -3.1; LRMS (ESI<sup>+</sup>) Calcd. for C<sub>21</sub>H<sub>45</sub>ClO<sub>8</sub>Si<sub>2</sub>+Na, 635.2; Found, 635.2; IR (thin film, cm<sup>-1</sup>) 3434, 2359, 2341, 2089, 1644, 1539, 1470, 1250, 508; TLC (80:20 hexanes:EtOAc): R<sub>f</sub> = 0.4.

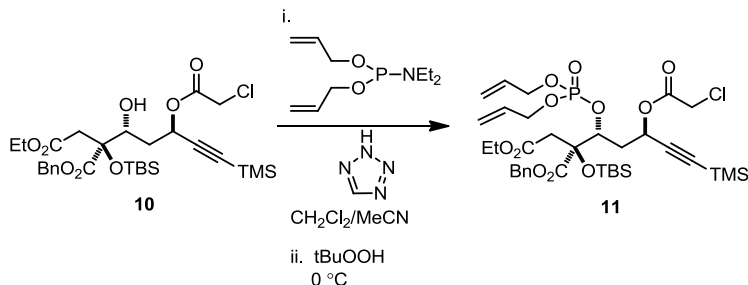

**(S)-1-benzyl-4-ethyl-2-((1R,3R)-1-((bis(allyloxy)phosphoryl)oxy)-3-(2-chloroacetoxy)-5-(trimethylsilyl)pent-4-yn-1-yl)-2-((tert-butyl dimethylsilyl)oxy)succinate (11):** A flame-dried and cooled 20-mL scintillation vial equipped with magnetic stir bar was charged with chloroacetate **10** (20 mg, 0.0326 mmol, 1.0 equiv), the phosphoramidite (32 mg, 0.147 mmol, 4.5 equiv), and  $\text{CH}_2\text{Cl}_2$  (2.0 mL). The resulting solution was cooled to  $0^\circ\text{C}$ , and a solution of tetrazole in MeCN (0.5 M, 0.5 mL, 0.244 mmol, 7.5 equiv) was added. The reaction was allowed to warm to rt, and it was stirred for 2.5 h. The solution was again cooled to  $0^\circ\text{C}$ , and a solution of tBuOOH in decane (5.2 M, 0.1 mL) was added dropwise. After stirring for 1h at the same temperature, an additional 0.1 mL of the tBuOOH solution was added, and the reaction was stirred for an additional 30 min. The reaction was quenched by the addition of saturated  $\text{NaSO}_3$  (aq), diluted with  $\text{Et}_2\text{O}$ , and washed with saturated aqueous  $\text{NaHCO}_3$  and brine. The solvent was removed *in vacuo*, and the crude organic material was purified via flash chromatography, eluting with 90:10 to 85:15 Hexanes:EtOAc, to afford the title compound as a colorless oil (18 mg, 71%). Analytical data:  $^1\text{H NMR}$  (400 MHz,  $\text{CDCl}_3$ ):  $\delta$  7.42-7.26 (m, 5H), 6.01-5.79 (m, 2H), 5.47 (d,  $J = 10.8$  Hz, 1H), 5.36-5.19 (m, 5H), 5.10 (d,  $J = 12.0$  Hz, 1H), 4.74 (t,  $J = 9.2$  Hz, 1H), 4.52-4.34 (m, 4H), 4.18 (d,  $J = 14.8$  Hz, 1H), 4.08 (d,  $J = 14.8$  Hz, 1H), 4.06-4.02 (m, 2H), 3.0 (d,  $J = 15.2$  Hz, 1H), 2.69 (d,  $J = 15.2$  Hz, 1H), 2.39-2.33 (m, 1H), 2.19-2.13 (m, 1H), 1.18 (t,  $J = 7.2$  Hz, 3H), 0.87 (s, 9H), 0.21 (s, 3H), 0.15 (s, 9H), 0.13 (s, 3H);  $^{13}\text{C NMR}$  (125 MHz,  $\text{CDCl}_3$ ,  $^{13}\text{C}$ - $^{31}\text{P}$  coupling constants indicated):  $\delta$  170.6, 170.0, 166.1, 135.2, 132.2 (d,  $J = 6.3$  Hz), 132.1 (d,  $J = 7.5$  Hz), 128.5, 128.3, 118.9, 118.3, 101.1, 91.5, 80.5 (d,  $J = 5.0$  Hz), 78.5 (d,  $J = 6.3$  Hz), 68.7 (d,  $J = 6.3$  Hz), 68.4 (d,  $J = 6.3$  Hz), 67.8, 62.3, 60.9, 53.4, 42.7, 41.0, 36.5, 26.0, 19.0, 14.0, -0.4, -2.8, -3.0;  $^{31}\text{P NMR}$  (160 MHz,  $\text{CDCl}_3$ ):  $\delta$  -1.79 Hz; **LRMS (ESI<sup>+</sup>)** Calcd. for  $\text{C}_{35}\text{H}_{54}\text{ClO}_{11}\text{PSi}_2+\text{Na}$ , 795.3; Found, 795.2; **IR** (thin film,  $\text{cm}^{-1}$ ) 3436, 2360, 2090, 1644, 1463, 1252, 1081; **TLC**(70:30 Hex:EtOAc):  $R_f = 0.52$ .

# <sup>1</sup>H and <sup>13</sup>C Spectra

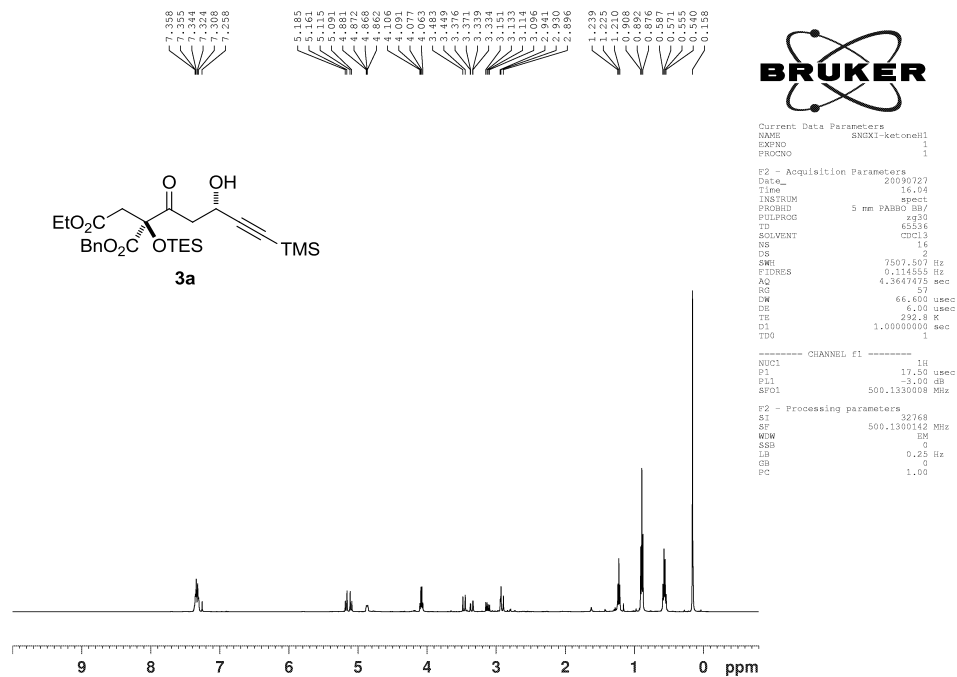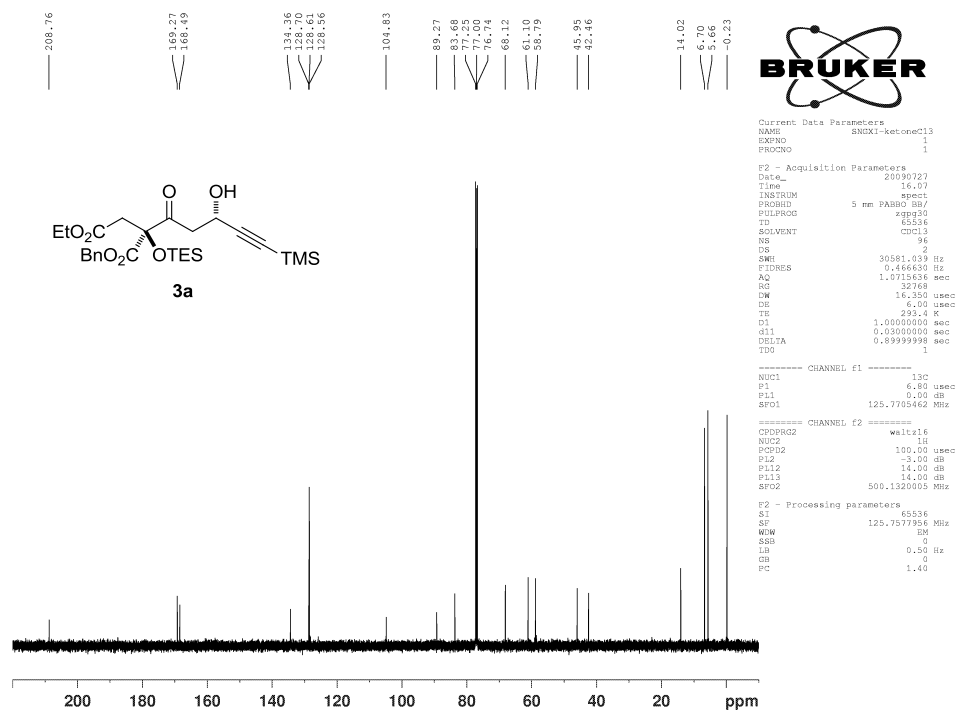

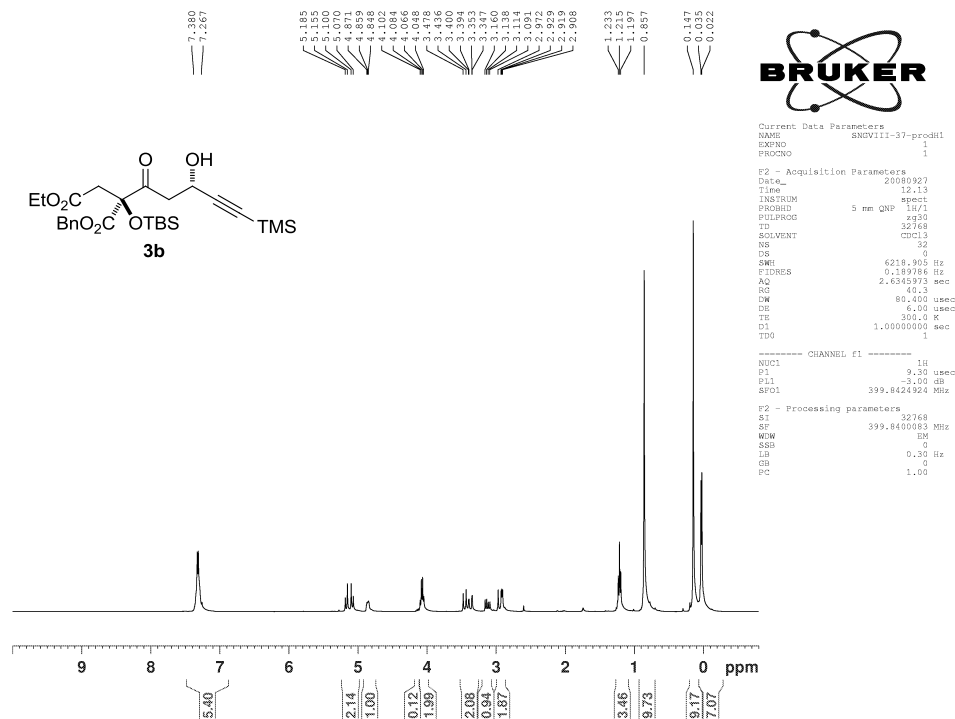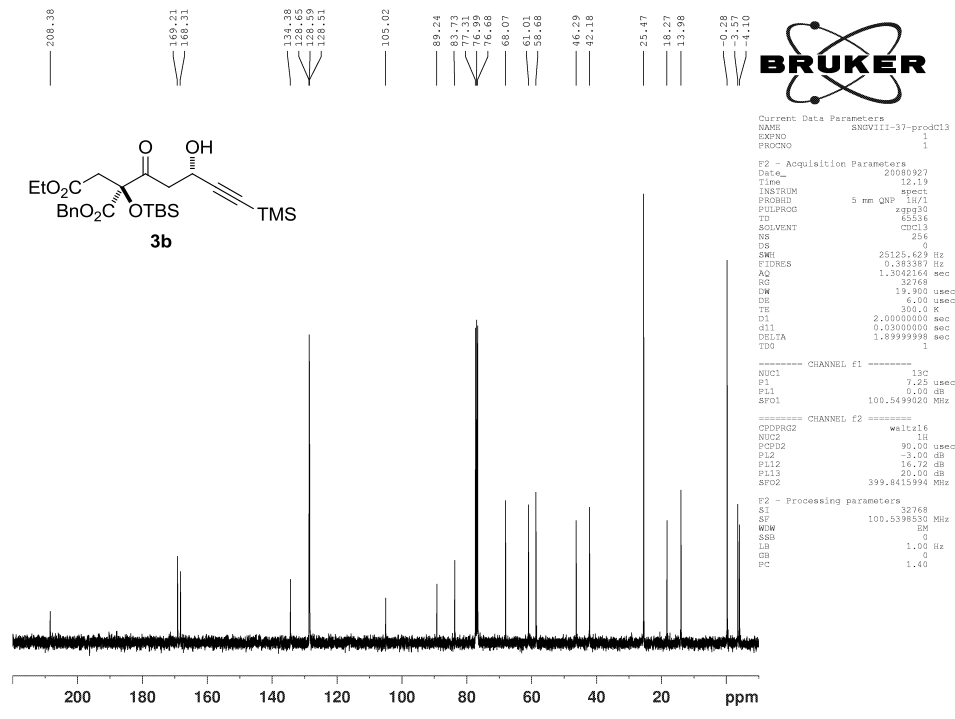

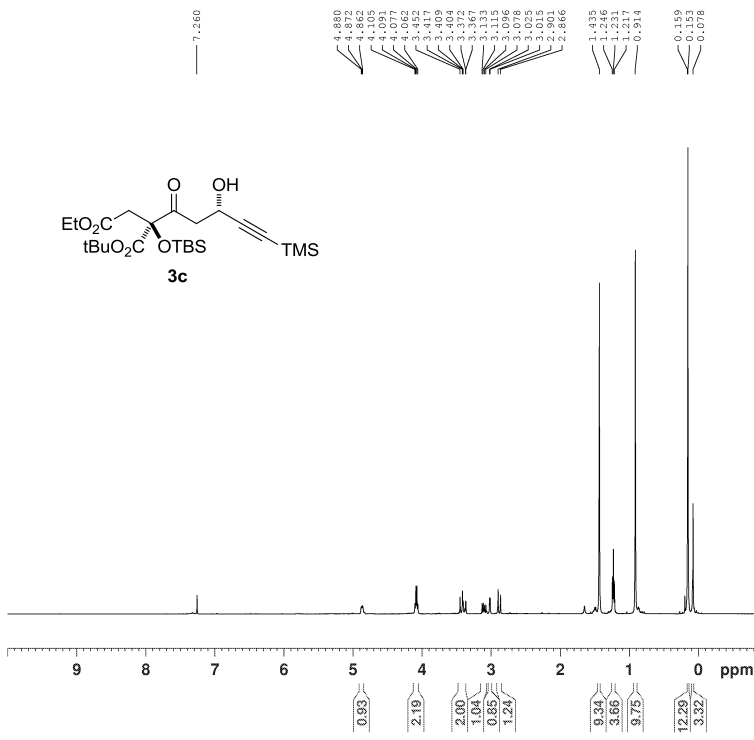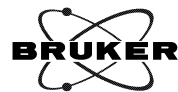

Current Data Parameters  
 NAME SNG-TBS3comH1  
 EXPNO 1  
 PROCNO 1

F2 - Acquisition Parameters  
 Date\_ 20100709  
 Time 10:19  
 INSTRUM spect  
 PROBRD 5 mm PABBO BB/  
 PULPROG zgpg30  
 TD 65536  
 SOLVENT CDCl3  
 NS 8  
 DS 2  
 SWH 7507.507 Hz  
 FIDRES 0.116255 Hz  
 AQ 4.384792 sec  
 RG 57  
 DW 66.600 usec  
 DE 6.00 usec  
 TE 292.1 K  
 D1 1.00000000 sec  
 TD0 1

----- CHANNEL f1 -----  
 NU1 1H  
 P1 13.50 usec  
 PL1 0.00 dB  
 SF01 500.1330008 MHz

F2 - Processing parameters  
 SI 32768  
 SF 500.13300135 MHz  
 WHW EM  
 SSB 0  
 LB 0.25 Hz  
 GB 0  
 PC 1.00

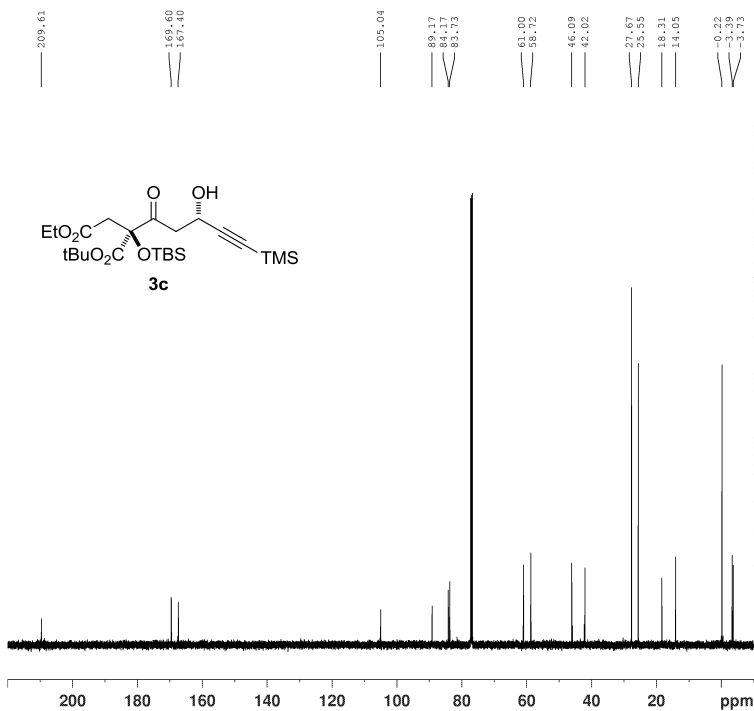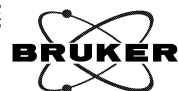

Current Data Parameters  
 NAME SNG-TBS3comD13  
 EXPNO 1  
 PROCNO 1

F2 - Acquisition Parameters  
 Date\_ 20100709  
 Time 10:24  
 INSTRUM spect  
 PROBRD 5 mm PABBO BB/  
 PULPROG zgpg30  
 TD 65536  
 SOLVENT CDCl3  
 NS 295  
 DS 0  
 SWH 30581.039 Hz  
 FIDRES 0.466630 Hz  
 AQ 1.0715636 sec  
 RG 32768  
 DW 16.250 usec  
 DE 6.00 usec  
 TE 293.5 K  
 D1 1.00000000 sec  
 d11 0.02000000 sec  
 DELTA 0.89999998 sec  
 TD0 1

----- CHANNEL f1 -----  
 NU1 13C  
 P1 7.00 usec  
 PL1 0.00 dB  
 SF01 125.7705462 MHz

----- CHANNEL f2 -----  
 CPDPRG2 waltz16  
 NU2 1H  
 PCPD2 70.00 usec  
 PL2 0.00 dB  
 PL12 14.30 dB  
 PL13 18.00 dB  
 SF02 500.1330005 MHz

F2 - Processing parameters  
 SI 65536  
 SF 125.7577945 MHz  
 WHW EM  
 SSB 0  
 LB 0.50 Hz  
 GB 0  
 PC 1.40

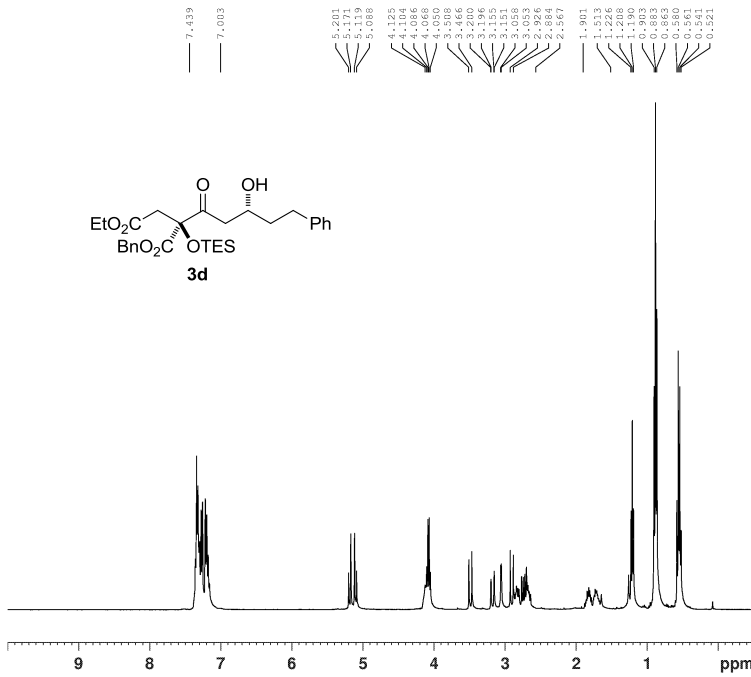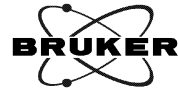

Current Data Parameters  
 NAME SNG-cinn3com-11  
 EXPNO 1  
 PROCNO 1

F2 - Acquisition Parameters  
 Date\_ 20100706  
 Time 16.12  
 INSTRUM spect  
 PROBHD 5 mm QNP 1H/1  
 PULPROG zg30  
 TD 32768  
 SOLVENT CDCl3  
 NS 16  
 DS 0  
 SWH 6218.905 Hz  
 FIDRES 0.189786 Hz  
 AQ 2.6345973 sec  
 RG 90.5  
 DW 80.400 usec  
 DE 6.00 usec  
 TE 300.0 K  
 D1 1.00000000 sec  
 TDO 1

===== CHANNEL f1 =====  
 NUC1 1H  
 P1 9.30 usec  
 PL1 -3.00 dB  
 SFO1 399.7824920 MHz

F2 - Processing parameters  
 SI 32768  
 SF 399.7800115 MHz  
 WDW EM  
 SSB 0  
 LB 0.30 Hz  
 GB 0  
 PC 1.00

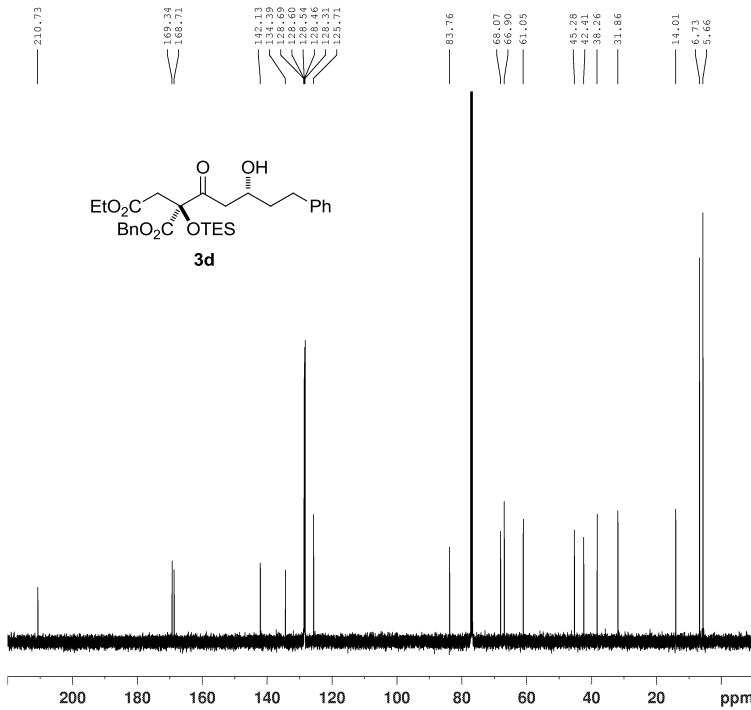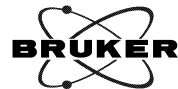

Current Data Parameters  
 NAME SNG-Cinn3com213  
 EXPNO 1  
 PROCNO 1

F2 - Acquisition Parameters  
 Date\_ 20100706  
 Time 14.29  
 INSTRUM spect  
 PROBHD 5 mm PABBO BB/  
 PULPROG zgpg30  
 TD 65536  
 SOLVENT CDCl3  
 NS 222  
 DS 0  
 SWH 30581.039 Hz  
 FIDRES 0.466630 Hz  
 AQ 1.0715636 sec  
 RG 32768  
 DW 16.250 usec  
 DE 6.00 usec  
 TE 293.2 K  
 D1 1.00000000 sec  
 d11 0.02000000 sec  
 DELTA 0.89999998 sec  
 TDO 1

===== CHANNEL f1 =====  
 NUC1 13C  
 P1 6.80 usec  
 PL1 0.00 dB  
 SFO1 125.7705462 MHz

===== CHANNEL f2 =====  
 CPDPRG2 waltz16  
 NUC2 1H  
 PCPD2 100.00 usec  
 P12 -3.00 dB  
 PL12 14.00 dB  
 PL13 14.00 dB  
 SFO2 500.1320005 MHz

F2 - Processing parameters  
 SI 65536  
 SF 125.7577973 MHz  
 WDW EM  
 SSB 0  
 LB 0.50 Hz  
 GB 0  
 PC 1.40



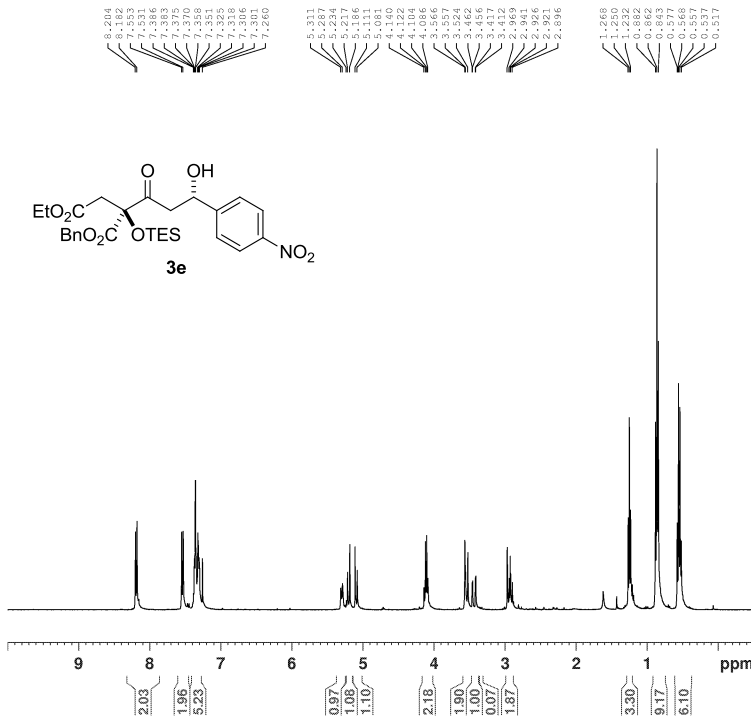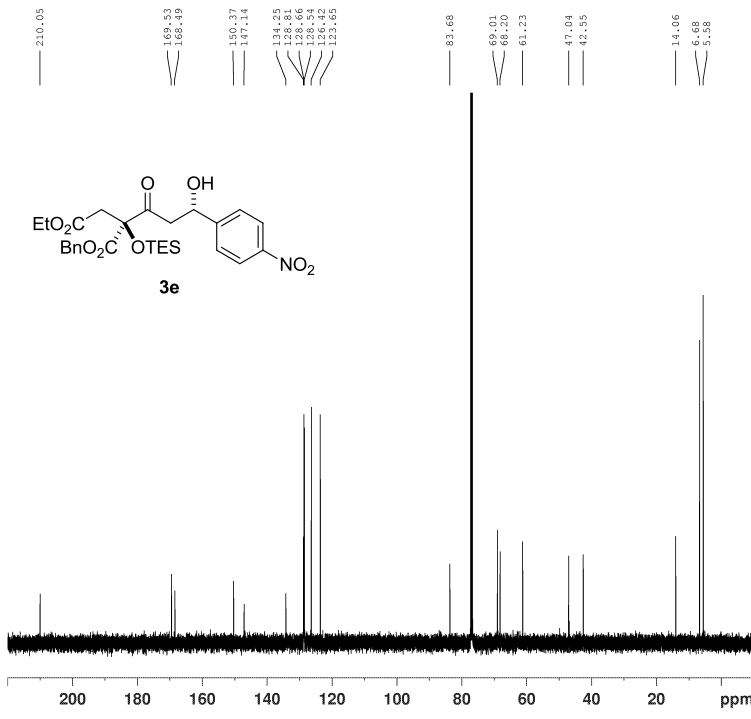

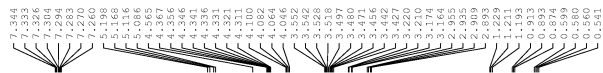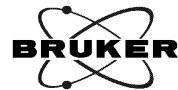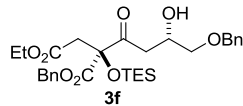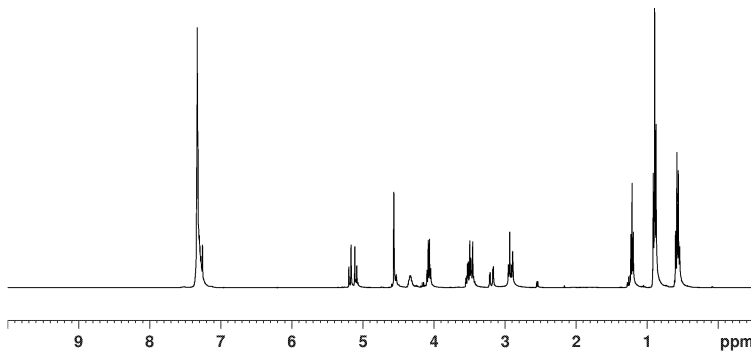

Current Data Parameters  
 NAME SNG-Bncom-H1  
 EXPNO 1  
 PROCNO 1

F2 - Acquisition Parameters  
 Date\_ 20100706  
 Time 16.05  
 INSTRUM spect  
 PROBHD 5 mm QNP  
 PULPROG zg30  
 TD 32768  
 SOLVENT CDCl3  
 NS 3  
 DS 0  
 SWH 6218.905 Hz  
 FIDRES 0.189786 Hz  
 AQ 2.6345973 sec  
 RG 64  
 DW 80.400 usec  
 DE 6.00 usec  
 TE 300.0 K  
 D1 1.00000000 sec  
 TDO 1

===== CHANNEL f1 =====  
 NUC1 1H  
 P1 9.30 usec  
 PL1 -3.00 dB  
 SFO1 399.7824920 MHz

F2 - Processing parameters  
 SI 32768  
 SF 399.7800103 MHz  
 WDW EM  
 SSB 0  
 LB 0.30 Hz  
 GB 0  
 PC 1.00

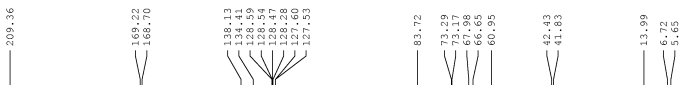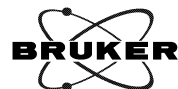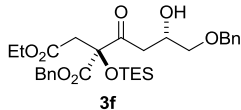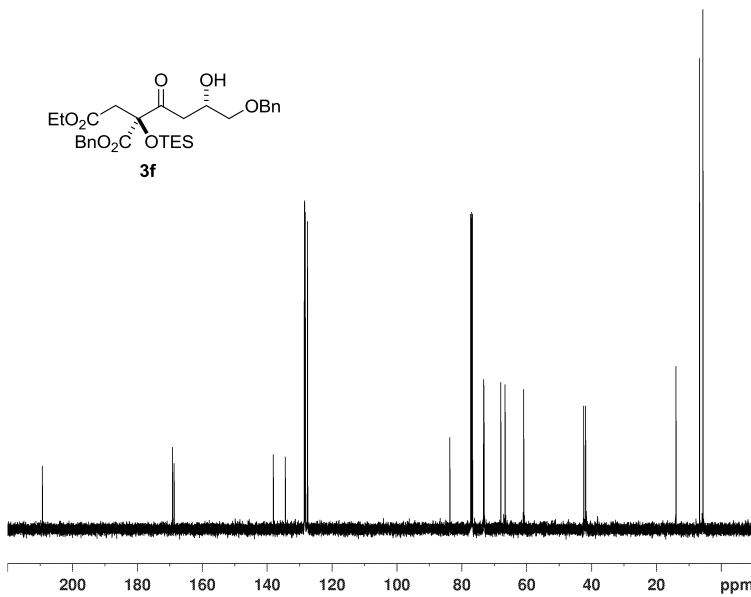

Current Data Parameters  
 NAME SNG-Bn3comCl3  
 EXPNO 1  
 PROCNO 1

F2 - Acquisition Parameters  
 Date\_ 20100706  
 Time 13.52  
 INSTRUM spect  
 PROBHD 5 mm PABBO BB/  
 PULPROG zgpg30  
 TD 65536  
 SOLVENT CDCl3  
 NS 198  
 DS 0  
 SWH 30581.039 Hz  
 FIDRES 0.466630 Hz  
 AQ 1.0719636 sec  
 RG 32768  
 DW 16.350 usec  
 DE 6.00 usec  
 TE 292.7 K  
 D1 1.00000000 sec  
 d11 0.03000000 sec  
 DELTA 0.89999998 sec  
 TDO 1

===== CHANNEL f1 =====  
 NUC1 13C  
 P1 7.00 usec  
 PL1 0.00 dB  
 SFO1 125.7703462 MHz

===== CHANNEL f2 =====  
 CPDPRG2 waltz16  
 NUC2 1H  
 PCPD2 70.00 usec  
 PL2 0.00 dB  
 PL12 14.30 dB  
 PL13 18.00 dB  
 SFO2 500.1320005 MHz

F2 - Processing parameters  
 SI 65536  
 SF 125.7578021 MHz  
 NW EM  
 SSB 0  
 LB 0.50 Hz  
 GB 0  
 PC 1.40

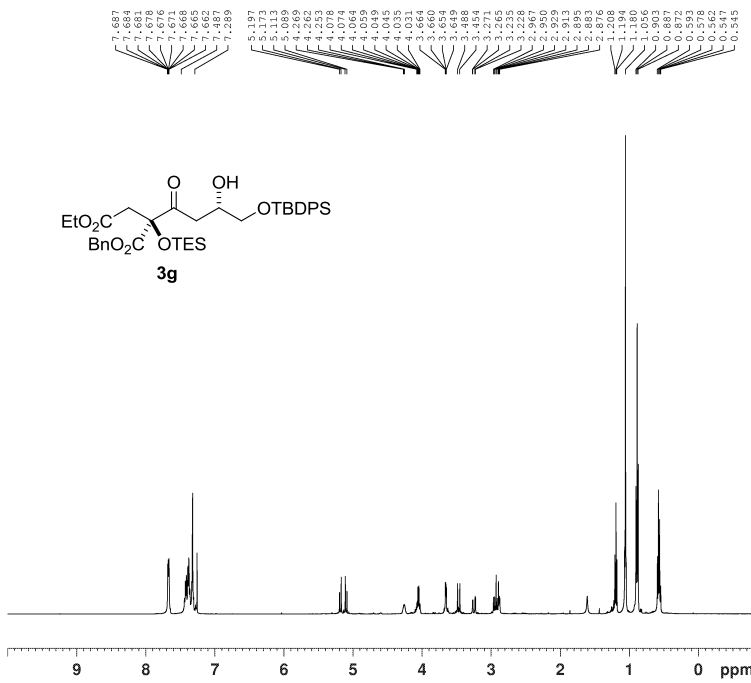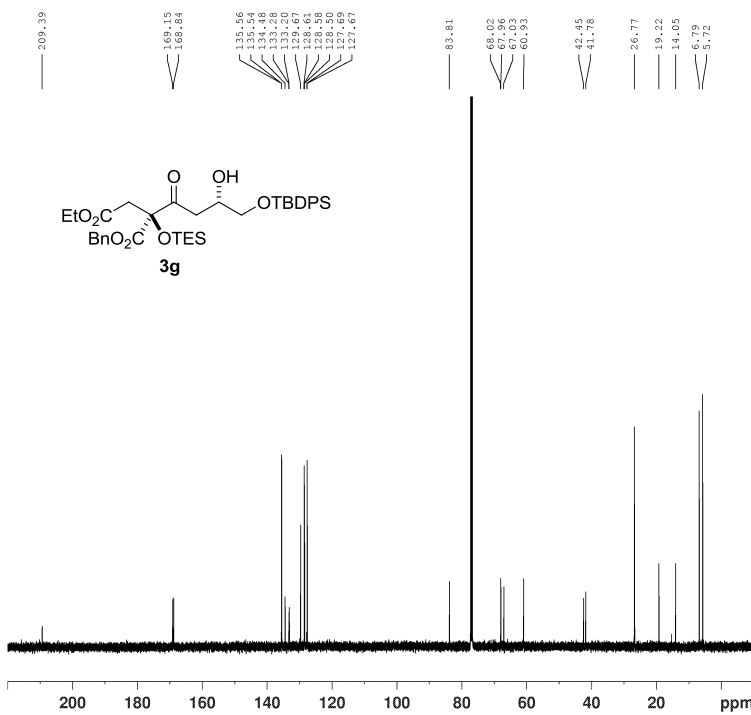

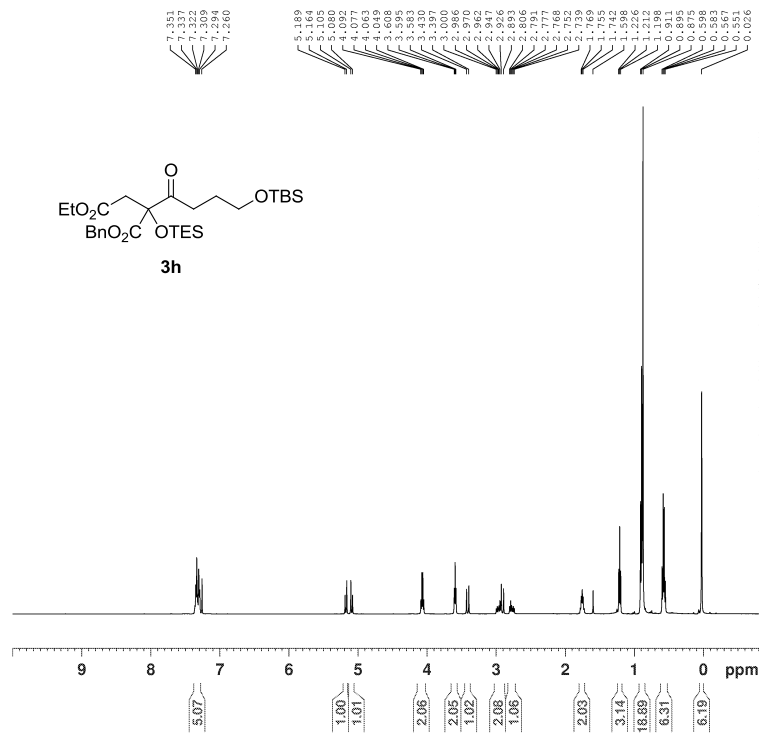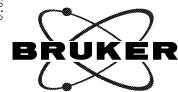

Current Data Parameters  
 NAME SND-Butyro3comH1  
 EXPNO 1  
 PROCNO 1

F2 - Acquisition Parameters  
 Date\_ 20100709  
 Time 9.58  
 INSTRUM spect  
 PROBRD 5 mm PABBO BB/  
 PULPROG zg30  
 TD 65536  
 SOLVENT cdcl3  
 NS 0  
 DS 0  
 SWH 7507.507 Hz  
 FIDRES 0.114555 Hz  
 AQ 4.364702 sec  
 RG 101.6  
 DW 66.600 usec  
 DE 6.00 usec  
 TE 292.0 K  
 D1 1.0000000 sec  
 TD0 1

----- CHANNEL f1 -----  
 NUC1 1H  
 P1 13.50 usec  
 PL1 0.00 dB  
 SFO1 500.1330408 MHz

F2 - Processing parameters  
 SI 32768  
 SF 500.1330133 MHz  
 WHW EM  
 SSB 0  
 LB 0.25 Hz  
 GB 0  
 PC 1.00

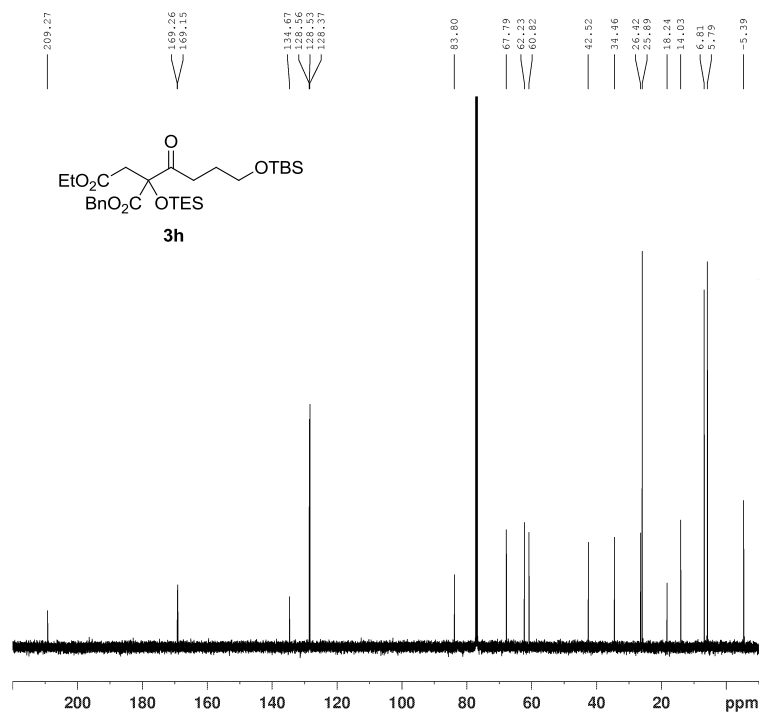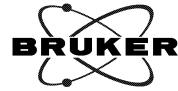

Current Data Parameters  
 NAME SND-Butyro3comC13  
 EXPNO 1  
 PROCNO 1

F2 - Acquisition Parameters  
 Date\_ 20100709  
 Time 10.02  
 INSTRUM spect  
 PROBRD 5 mm PABBO BB/  
 PULPROG zgpg30  
 TD 65536  
 SOLVENT cdcl3  
 NS 0  
 DS 0  
 SWH 30581.039 Hz  
 FIDRES 0.466630 Hz  
 AQ 1.0719636 sec  
 RG 32768  
 DW 16.350 usec  
 DE 6.00 usec  
 TE 292.0 K  
 D1 1.0000000 sec  
 d11 0.0300000 sec  
 DELTA 0.8999998 sec  
 TD0 1

===== CHANNEL f1 =====  
 NUC1 13C  
 P1 7.00 usec  
 PL1 0.00 dB  
 SFO1 125.7703462 MHz

===== CHANNEL f2 =====  
 CPDPRG2 waltz16  
 NUC2 1H  
 PCPD2 70.00 usec  
 PL2 0.00 dB  
 PL12 14.30 dB  
 PL13 18.00 dB  
 SFO2 500.1320005 MHz

F2 - Processing parameters  
 SI 65536  
 SF 125.7577941 MHz  
 WHW EM  
 SSB 0  
 LB 0.50 Hz  
 GB 0  
 PC 1.40

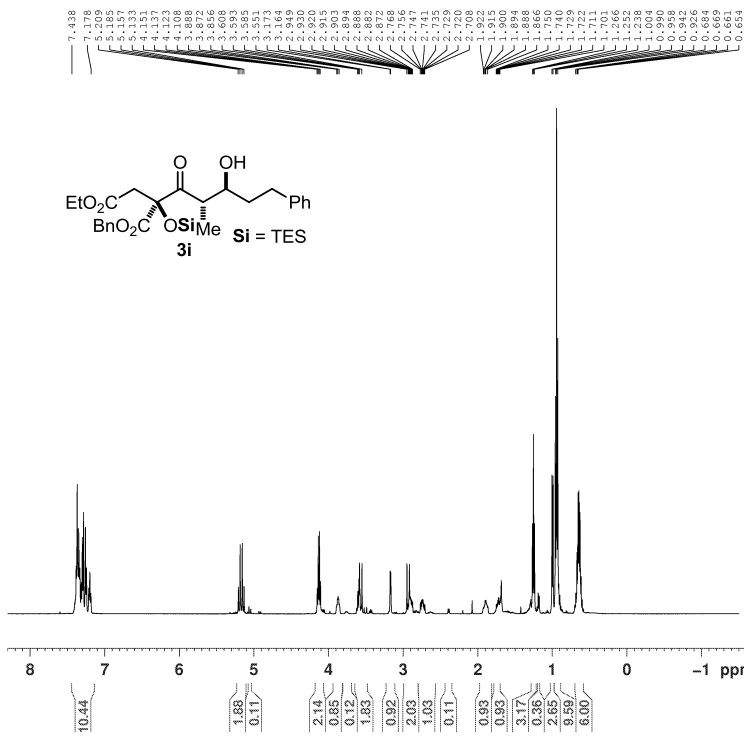

Current Data Parameters  
NAME SNO-transcinn-H1  
EXPNO 1  
PROCNO 1

F2 - Acquisition Parameters  
Date\_ 20100719  
Time 9.27  
INSTRUM spect  
PROBHD 5 mm PABBO BB/  
PULPROG zgpg30  
TD 65536  
SOLVENT CDCl3  
NS 16  
DS 0  
SWH 7507.507 Hz  
FIDRES 0.114555 Hz  
AQ 4.3849732 sec  
RG 181  
DW 66.600 usec  
DE 6.00 usec  
TE 291.2 K  
D1 1.00000000 sec  
TD0 1

----- CHANNEL f1 -----  
NUC1 1H  
P1 17.50 usec  
PL1 -2.00 dB  
SFO1 500.1330408 Mhz

F2 - Processing parameters  
SI 32768  
SF 500.1330007 Mhz  
WHW EM  
SWS 0  
LB 0.25 Hz  
GB 0  
PC 1.00

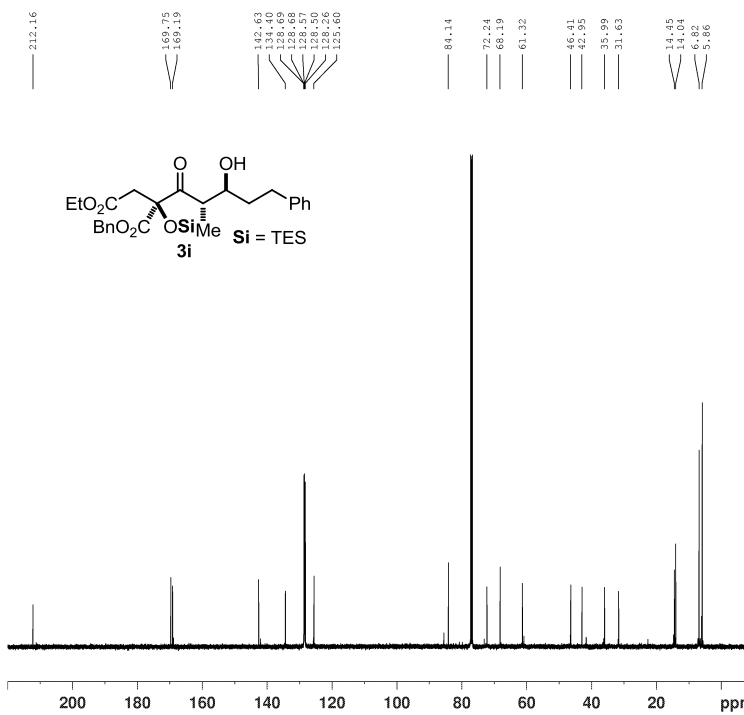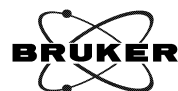

Current Data Parameters  
NAME SNO-transcinn-C13  
EXPNO 1  
PROCNO 1

F2 - Acquisition Parameters  
Date\_ 20100719  
Time 9.54  
INSTRUM spect  
PROBHD 5 mm PABBO BB/  
PULPROG zgpg30  
TD 65536  
SOLVENT CDCl3  
NS 16  
DS 2  
SWH 30581.039 Hz  
FIDRES 0.446630 Hz  
AQ 1.0719636 sec  
RG 32768  
DW 16.350 usec  
DE 6.00 usec  
TE 291.4 K  
D1 1.00000000 sec  
d11 0.03000000 sec  
DELTA 0.89999998 sec  
TD0 1

----- CHANNEL f1 -----  
NUC1 13C  
P1 7.00 usec  
PL1 0.00 dB  
SFO1 125.7703462 Mhz

----- CHANNEL f2 -----  
CPDPRG2 waltz16  
NUC2 1H  
PCPD2 70.00 usec  
P12 0.00 dB  
P13 14.30 dB  
P13 18.00 dB  
SFO2 500.1320005 Mhz

F2 - Processing parameters  
SI 65536  
SF 125.7577978 Mhz  
WHW EM  
SWS 0  
LB 0.50 Hz  
GB 0  
PC 1.40

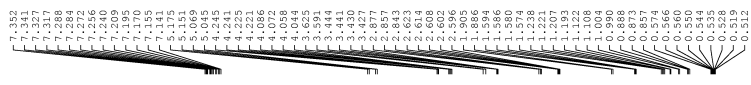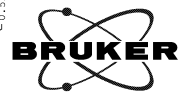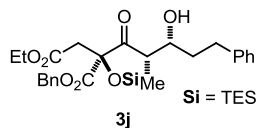

```

Current Data Parameters
NAME          JTM-6-29-a1+2
EXPNO        1
PROCNO       1

F2 - Acquisition Parameters
Date_        20100812
Time         9.08
INSTRUM      spect
PROBHD       5 mm PABBO BB/
PULPROG      zg30
TD           65536
SOLVENT      CDCl3
NS           17
DS           0
SWH          7507.507 Hz
FIDRES      0.114555 Hz
AQ          4.364792 sec
RG           71.8
RW          66.600 usec
DE           6.00 usec
TE           295.0 K
D1          1.00000000 sec
TD0         1

----- CHANNEL f1 -----
NUC1         1H
P1           13.50 usec
PL1          0.00 dB
SFO1         500.1330408 MHz

F2 - Processing parameters
SI           32768
SF           500.1330234 MHz
WHW         EM
SSB          0
LB           0.25 Hz
GB           0
PC           1.00
  
```

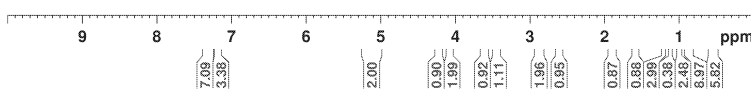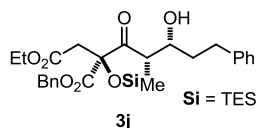

```

Current Data Parameters
NAME          JTM-6-29-a1+2 13C
EXPNO        1
PROCNO       1

F2 - Acquisition Parameters
Date_        20100812
Time         9.17
INSTRUM      spect
PROBHD       5 mm PABBO BB/
PULPROG      zgpg30
TD           65536
SOLVENT      CDCl3
NS           327
DS           0
SWH          30581.039 Hz
FIDRES      0.466630 Hz
AQ          1.0719636 sec
RG           4597.6
RW          16.350 usec
DE           6.00 usec
TE           296.4 K
D1          1.00000000 sec
d11         0.03000000 sec
DELTA       0.89999998 sec
TD0         1

----- CHANNEL f1 -----
NUC1         13C
P1           7.00 usec
PL1          0.00 dB
SFO1         125.7703462 MHz

----- CHANNEL f2 -----
CPDPRG2      waltz16
NUC2         1H
PCPD2       70.00 usec
P12          0.00 dB
P13         14.30 dB
P13         18.00 dB
SFO2         500.1320005 MHz

F2 - Processing parameters
SI           65536
SF           125.7577969 MHz
WHW         EM
SSB          0
LB           0.50 Hz
GB           0
PC           1.40
  
```

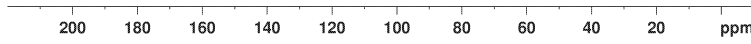

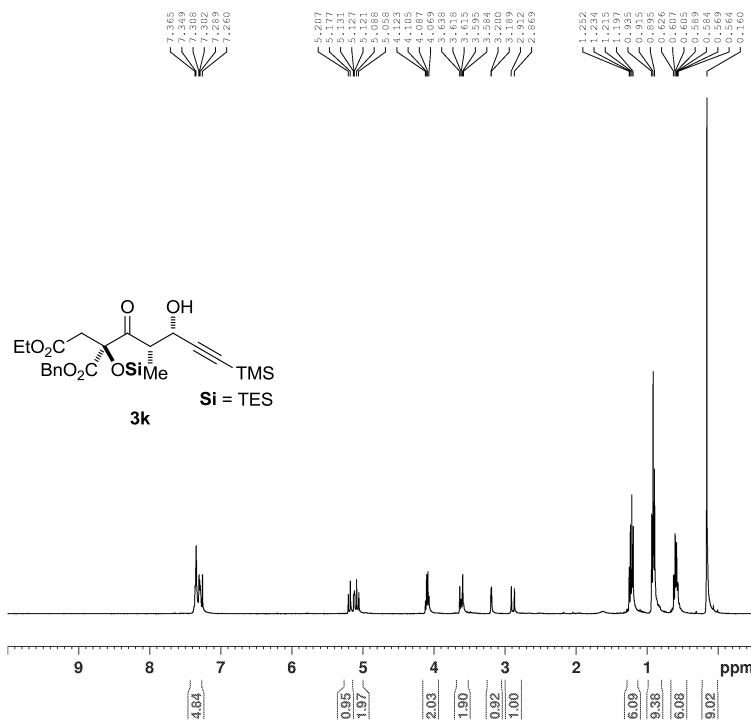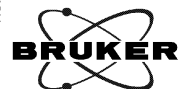

Current Data Parameters  
 NAME SNG-Me3com-H1  
 EXPNO 1  
 PROCNO 1

F2 - Acquisition Parameters  
 Date\_ 20100706  
 Time 16.03  
 INSTRUM spect  
 PROBHD 5 mm QNP 1H/1  
 PULPROG zg30  
 TD 32768  
 SOLVENT CDCl3  
 NS 3  
 DS 0  
 SWH 6218.905 Hz  
 FIDRES 0.189786 Hz  
 AQ 2.6345973 sec  
 RG 161.3  
 DW 80.400 usec  
 DE 6.00 usec  
 TE 300.0 K  
 D1 1.00000000 sec  
 TDO 1

===== CHANNEL f1 =====  
 NUC1 1H  
 P1 9.30 usec  
 PL1 -3.00 dB  
 SFO1 399.7824920 MHz

F2 - Processing parameters  
 SI 32768  
 SF 399.7800105 MHz  
 WDW EM  
 SSB 0  
 LB 0.30 Hz  
 GB 0  
 PC 1.00

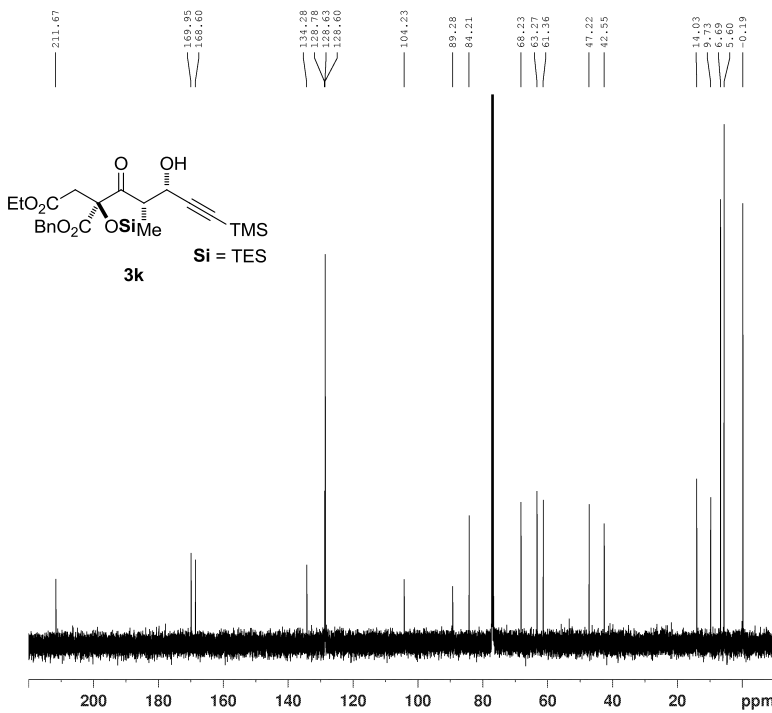

Current Data Parameters  
 NAME SNG-Me3com-C13  
 EXPNO 1  
 PROCNO 1

F2 - Acquisition Parameters  
 Date\_ 20100706  
 Time 14.45  
 INSTRUM spect  
 PROBHD 5 mm PABBO BB/  
 PULPROG zgpg30  
 TD 65536  
 SOLVENT CDCl3  
 NS 453  
 DS 0  
 SWH 30581.039 Hz  
 FIDRES 0.466630 Hz  
 AQ 1.0719636 sec  
 RG 32768  
 DW 16.350 usec  
 DE 6.00 usec  
 TE 295.6 K  
 D1 1.00000000 sec  
 d11 0.03000000 sec  
 DELTA 0.89999998 sec  
 TDO 1

===== CHANNEL f1 =====  
 NUC1 13C  
 P1 6.80 usec  
 PL1 0.00 dB  
 SFO1 125.7703462 MHz

===== CHANNEL f2 =====  
 CPDPRG2 waltz16  
 NUC2 1H  
 PCPD2 100.00 usec  
 P12 -3.00 dB  
 PL12 14.00 dB  
 P13 14.00 dB  
 SFO2 500.1320005 MHz

F2 - Processing parameters  
 SI 65536  
 SF 125.7577945 MHz  
 WDW EM  
 SSB 0  
 LB 0.50 Hz  
 GB 0  
 PC 1.40

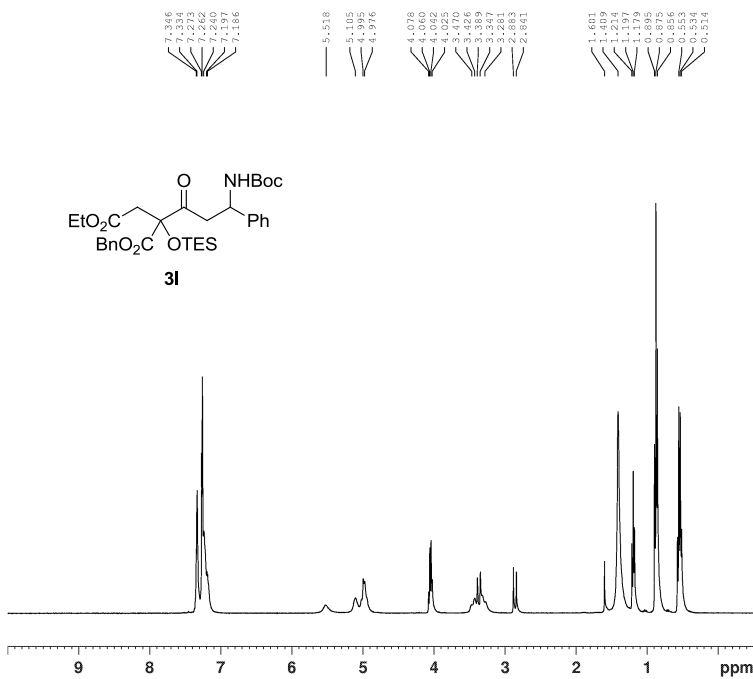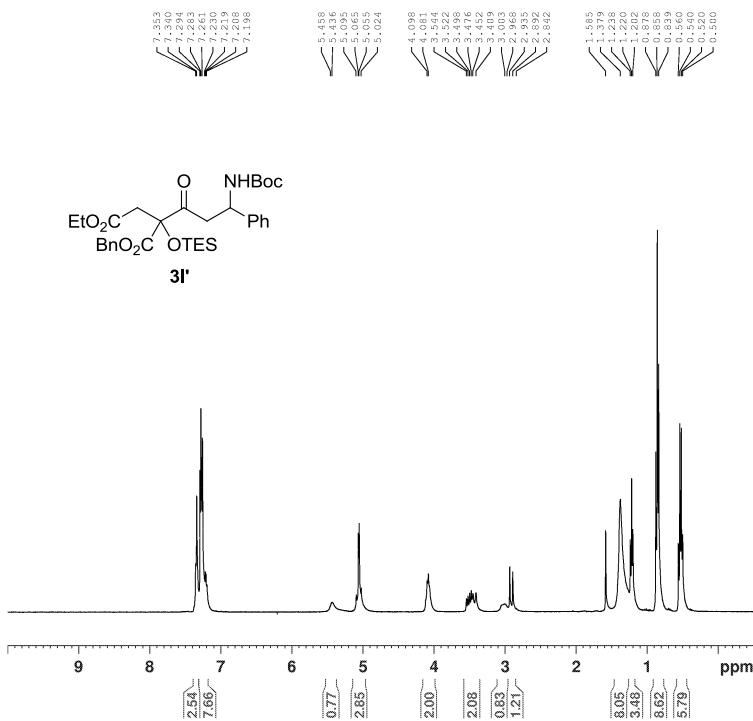



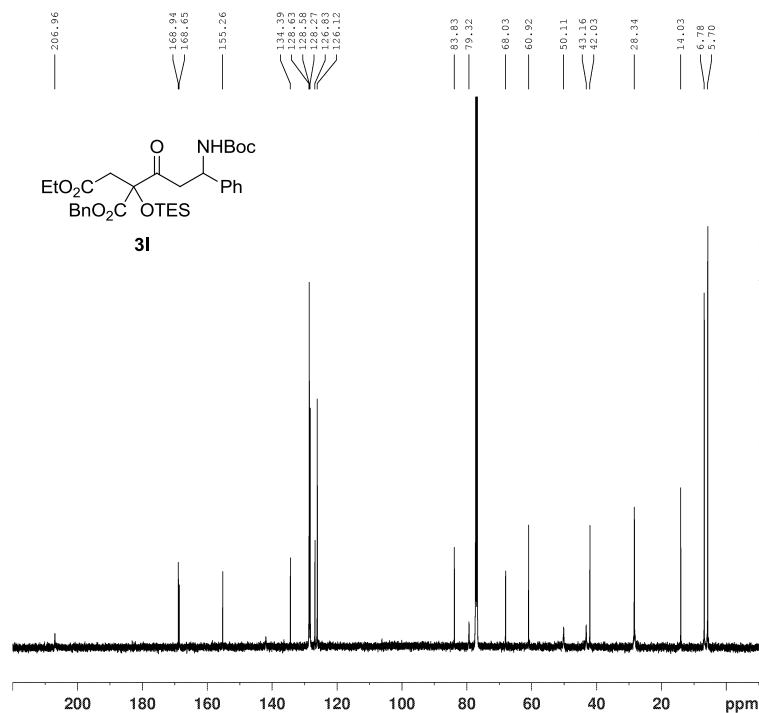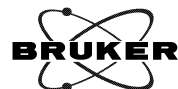

Current Data Parameters  
 NAME BNC-lectan-01-C13  
 EXPNO 1  
 PROCNO 1

F2 - Acquisition Parameters  
 Date\_ 20100719  
 Time 10.24  
 INSTRUM spect  
 PROBHD 5 mm PABBO BB/  
 PULPROG zgpg30  
 TD 65536  
 SOLVENT CDCl3  
 NS 3524  
 DS 0  
 SWH 30581.039 Hz  
 FIDRES 0.446630 Hz  
 AQ 1.1715636 sec  
 RG 32768  
 DW 16.350 usec  
 DE 6.00 usec  
 TE 293.2 K  
 D1 1.00000000 sec  
 d11 0.03000000 sec  
 DELTA 0.89999998 sec  
 TDO 1

==== CHANNEL f1 =====  
 NUC1 13C  
 P1 7.00 usec  
 PL1 0.00 dB  
 SFO1 125.770462 Mhz

==== CHANNEL f2 =====  
 CPDPRG2 waltz16  
 NU2 1H  
 PCPD2 70.00 usec  
 PL2 0.00 dB  
 PL12 14.30 dB  
 PL13 18.00 dB  
 SFO2 500.1320005 Mhz

F2 - Processing parameters  
 SI 65536  
 SF 125.7577965 Mhz  
 WDW EM  
 SSB 0  
 LB 1.00 Hz  
 GB 0  
 PC 1.40

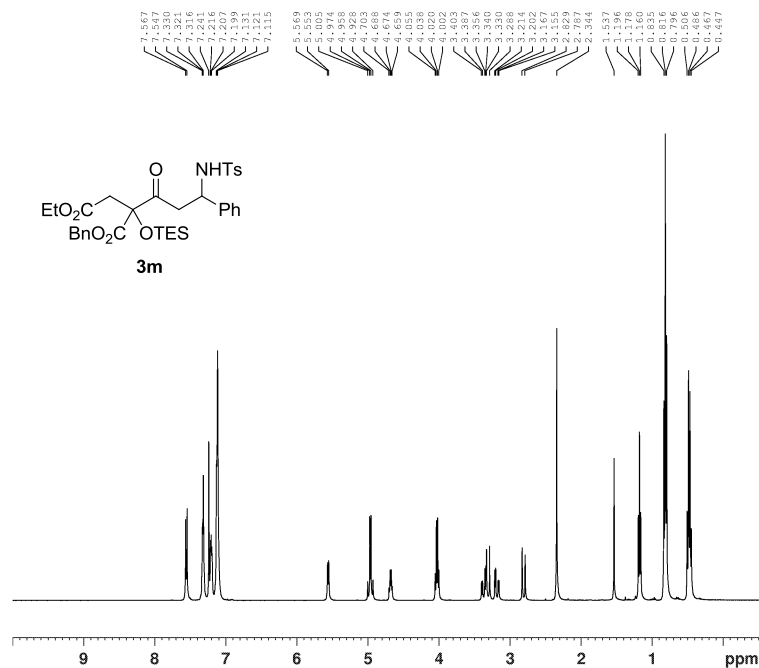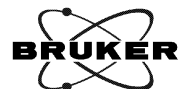

Current Data Parameters  
 NAME JTM-6-45-3  
 EXPNO 1  
 PROCNO 1

F2 - Acquisition Parameters  
 Date\_ 20100814  
 Time 13.52  
 INSTRUM spect  
 PROBHD 5 mm TXI 13C Z  
 PULPROG zgpg30  
 TD 32768  
 SOLVENT CDCl3  
 NS 24  
 DS 0  
 SWH 5341.880 Hz  
 FIDRES 0.163021 Hz  
 AQ 3.0672283 sec  
 RG 256  
 DW 93.600 usec  
 DE 6.00 usec  
 TE 293.0 K  
 D1 1.00000000 sec  
 TDO 1

==== CHANNEL f1 =====  
 NUC1 1H  
 P1 10.50 usec  
 PL1 0.00 dB  
 SFO1 400.0923618 Mhz

F2 - Processing parameters  
 SI 32768  
 SF 400.0900118 Mhz  
 WDW EM  
 SSB 0  
 LB 0.25 Hz  
 GB 0  
 PC 1.00

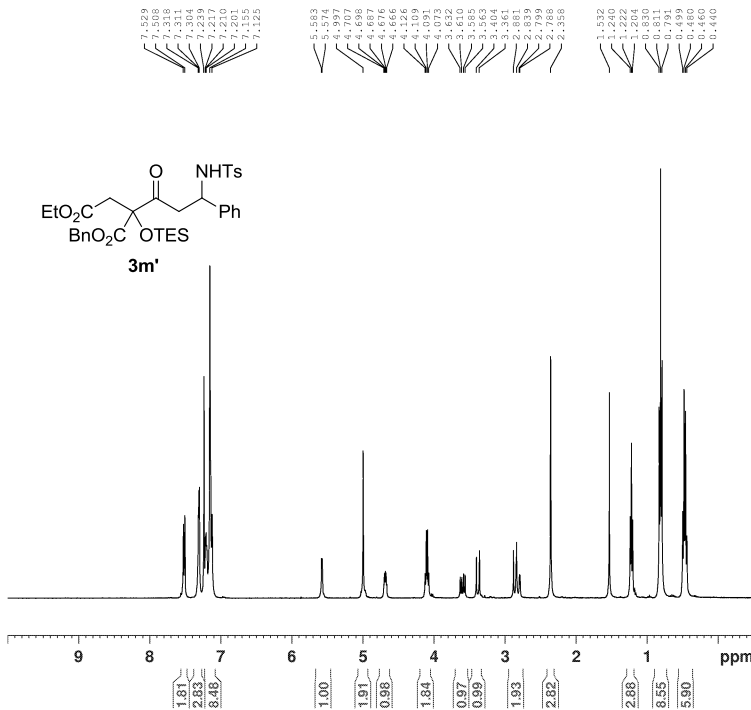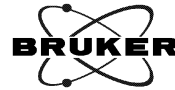

Current Data Parameters  
 NAME JTM-6-45-4  
 EXPNO 1  
 PROCNO 1

F2 - Acquisition Parameters  
 Date\_ 20100814  
 Time 13.56  
 INSTRUM spect  
 PROBHD 5 mm TXI 130 2  
 PULPROG zg30  
 TD 32768  
 SOLVENT cdc13  
 NS 14  
 DS 0  
 SWH 5341.880 Hz  
 FIDRES 0.163023 Hz  
 AQ 3.0672283 sec  
 RG 256  
 DW 93.600 usec  
 DE 6.00 usec  
 TE 295.0 K  
 D1 1.00000000 sec  
 TDO 1

----- CHANNEL f1 -----  
 NUC1 1H  
 P1 10.50 usec  
 PL1 0.00 dB  
 SFO1 400.0923618 MHz

F2 - Processing parameters  
 SI 32768  
 SF 400.0900125 MHz  
 WDW EM  
 SSB 0  
 LB 0.25 Hz  
 GB 0  
 PC 1.00

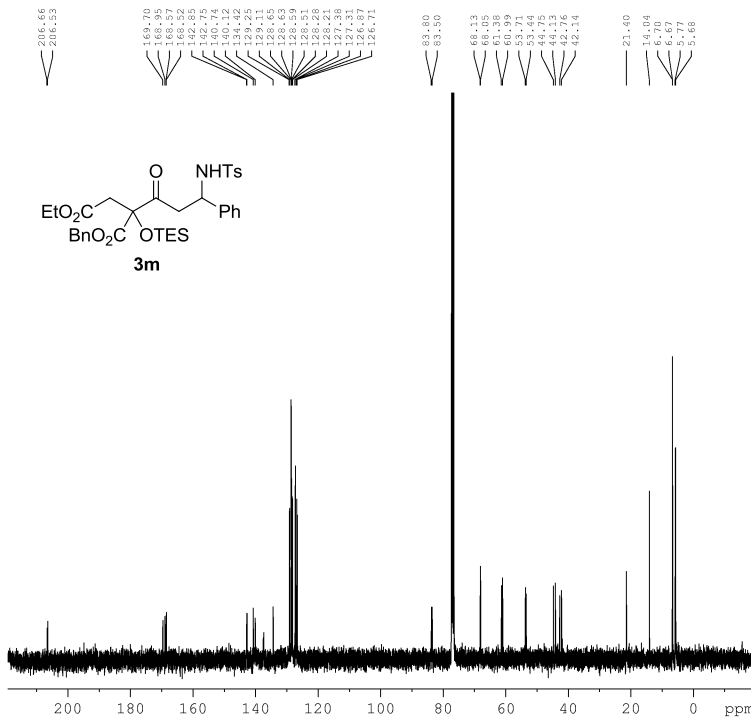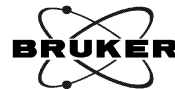

Current Data Parameters  
 NAME JTM-6-45-2 13C  
 EXPNO 1  
 PROCNO 1

F2 - Acquisition Parameters  
 Date\_ 20100814  
 Time 5.51  
 INSTRUM spect  
 PROBHD 5 mm QNP 1H/1  
 PULPROG zgpg50  
 TD 32768  
 SOLVENT cdc13  
 NS 6839  
 DS 0  
 SWH 23980.814 Hz  
 FIDRES 0.731836 Hz  
 AQ 0.6832828 sec  
 RG 16384  
 DW 20.850 usec  
 DE 6.00 usec  
 TE 300.0 K  
 D1 1.00000000 sec  
 d11 0.03000000 sec  
 DELTA 0.89999999 sec  
 TDO 1

----- CHANNEL f1 -----  
 NUC1 13C  
 P1 7.25 usec  
 PL1 0.00 dB  
 SFO1 100.5348134 MHz

----- CHANNEL f2 -----  
 CDPRG2 waltz16  
 NUC2 1H  
 PCPD2 90.00 usec  
 PL2 -3.00 dB  
 PL12 16.72 dB  
 PL13 20.00 dB  
 SFO2 399.7815991 MHz

F2 - Processing parameters  
 SI 32768  
 SF 100.5247622 MHz  
 WDW EM  
 SSB 0  
 LB 1.00 Hz  
 GB 0  
 PC 1.40

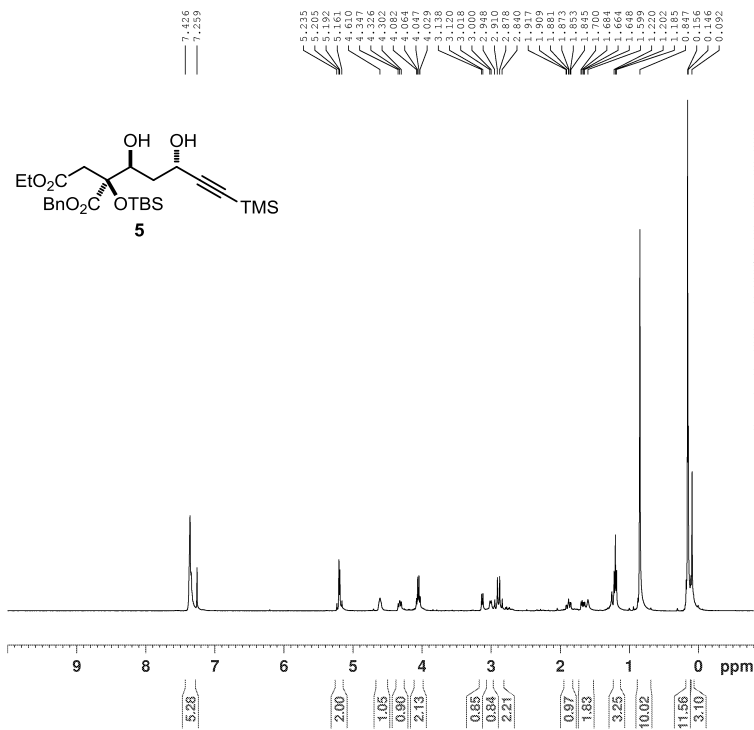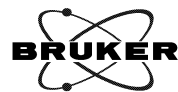

Current Data Parameters  
NAME SNGXIV-JM-73-2-antidiol  
EXPNO 1  
PROCNO 1

F2 - Acquisition Parameters  
Date\_ 20100530  
Time 18.18  
INSTRUM spect  
PROBHD 5 mm QNP 1H/1  
PULPROG zgpg30  
TD 32768  
SOLVENT Acetone  
NS 8  
DS 0  
SWH 6218.905 Hz  
FIDRES 0.289294 Hz  
AQ 2.6345973 sec  
RG 181  
DM 80.400 usec  
DE 6.00 usec  
TE 300.0 K  
D1 1.0000000 sec  
TD0 1

----- CHANNEL f1 -----  
NUC1 1H  
P1 9.30 usec  
PL1 0.00 dB  
SFO1 399.7624920 MHz

F2 - Processing parameters  
SI 32768  
SF 399.7601013 MHz  
WDW EM  
SSB 0  
LB 0.50 Hz  
GB 0  
PC 1.00

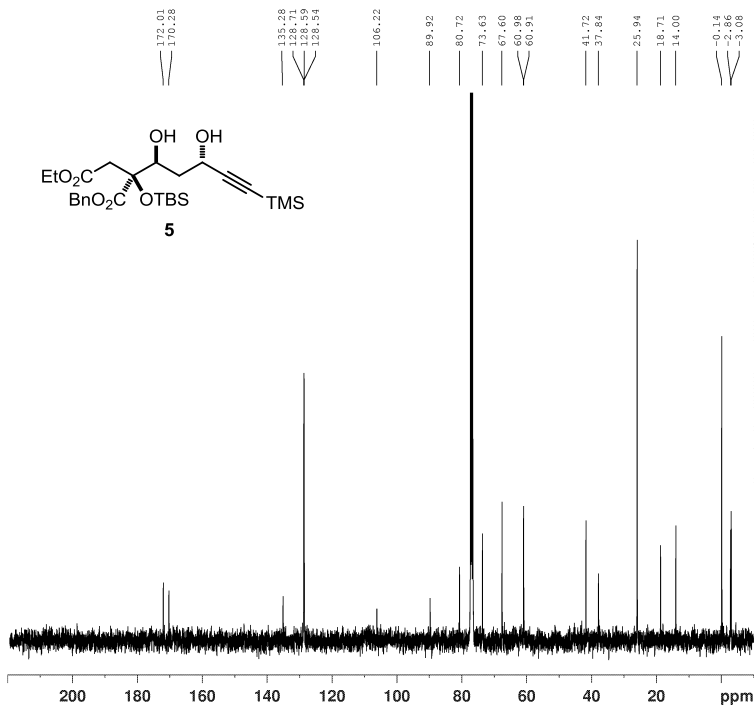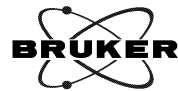

Current Data Parameters  
NAME SNGXIV-JM-73-2-antidiol13  
EXPNO 1  
PROCNO 1

F2 - Acquisition Parameters  
Date\_ 20100530  
Time 10.23  
INSTRUM spect  
PROBHD 5 mm QNP 1H/1  
PULPROG zgpg30  
TD 32768  
SOLVENT CDCl3  
NS 256  
DS 0  
SWH 23980.814 Hz  
FIDRES 0.731836 Hz  
AQ 0.4832628 sec  
RG 34384  
DM 80.400 usec  
DE 6.00 usec  
TE 300.0 K  
D1 1.0000000 sec  
D11 0.0300000 sec  
DELTA 0.9999999 sec  
TD0 1

----- CHANNEL f1 -----  
NUC1 13C  
P1 7.25 usec  
PL1 0.00 dB  
SFO1 100.626134 MHz

----- CHANNEL f2 -----  
CDPRG2 Waltz16  
NUC2 1H  
PCPD2 80.00 usec  
PCF 5.00 dB  
PL12 14.72 dB  
PL13 25.00 dB  
SFO2 399.7815991 MHz

F2 - Processing parameters  
SI 32768  
SF 100.6247931 MHz  
WDW EM  
SSB 0  
LB 2.00 Hz  
GB 0  
PC 1.00

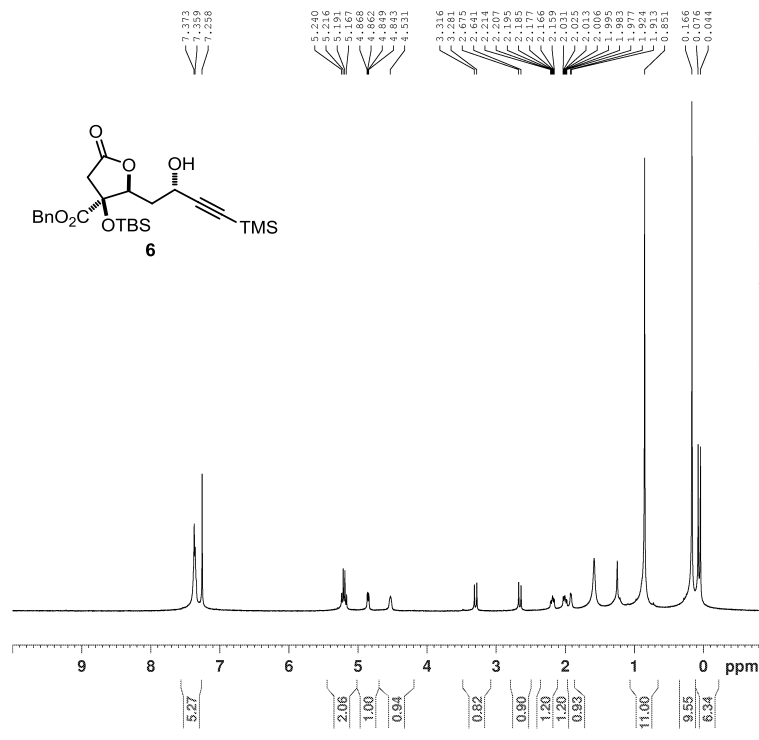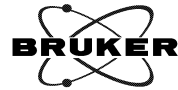

Current Data Parameters  
 NAME SNG-monoisactone11  
 EXPNO 1  
 PROCNO 1

F2 - Acquisition Parameters  
 Date\_ 20100501  
 Time 12.04  
 INSTRUM spect  
 PROBRD 5 mm PASPO BB/  
 PULPROG zgpg30  
 TD 65536  
 SOLVENT CDCl3  
 NS 8  
 DS 0  
 SWH 7507.507 Hz  
 FIDRES 0.144555 Hz  
 AQ 4.3649775 sec  
 RG 203.2  
 DM 65.500 usec  
 DE 6.00 usec  
 TE 292.4 K  
 D1 1.00000000 sec  
 TDO 1

===== CHANNEL f1 =====  
 NU1 1H  
 P1 17.50 usec  
 PL1 -2.00 dB  
 SF01 500.1330008 MHz

F2 - Processing parameters  
 SI 32768  
 SF 500.1330138 MHz  
 WNW 0  
 SSB 0  
 LB 0.25 Hz  
 GB 0  
 PC 1.00

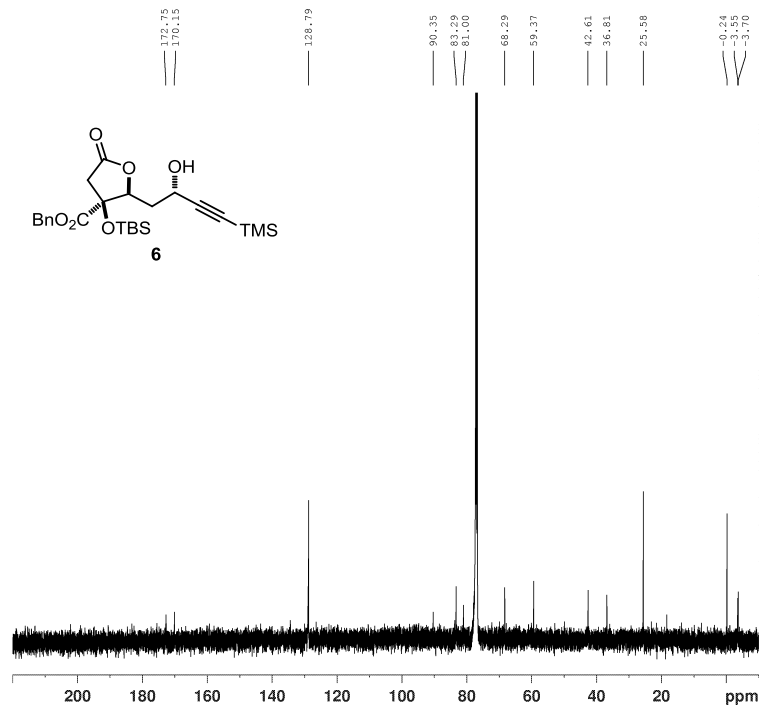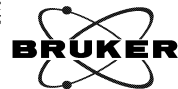

Current Data Parameters  
 NAME SNG-monoisactone13  
 EXPNO 1  
 PROCNO 1

F2 - Acquisition Parameters  
 Date\_ 20100501  
 Time 12.12  
 INSTRUM spect  
 PROBRD 5 mm PASPO BB/  
 PULPROG zgpg30  
 TD 65536  
 SOLVENT CDCl3  
 NS 1500  
 DS 0  
 SWH 30561.039 Hz  
 FIDRES 0.466630 Hz  
 AQ 1.0715636 sec  
 RG 32768  
 DM 16.350 usec  
 DE 6.00 usec  
 TE 292.4 K  
 D1 1.00000000 sec  
 d11 0.03000000 sec  
 DELTA 0.89999998 sec  
 TDO 1

===== CHANNEL f1 =====  
 NU1 13C  
 P1 7.00 usec  
 PL1 0.00 dB  
 SF01 125.7705462 MHz

===== CHANNEL f2 =====  
 CPDPRG2 waltz16  
 NU2 1H  
 P2P2 70.00 usec  
 PL2 0.00 dB  
 PL12 14.30 dB  
 PL13 18.00 dB  
 SF02 500.1330008 MHz

F2 - Processing parameters  
 SI 65536  
 SF 125.7577955 MHz  
 WNW 0  
 SSB 0  
 LB 1.00 Hz  
 GB 0  
 PC 1.40

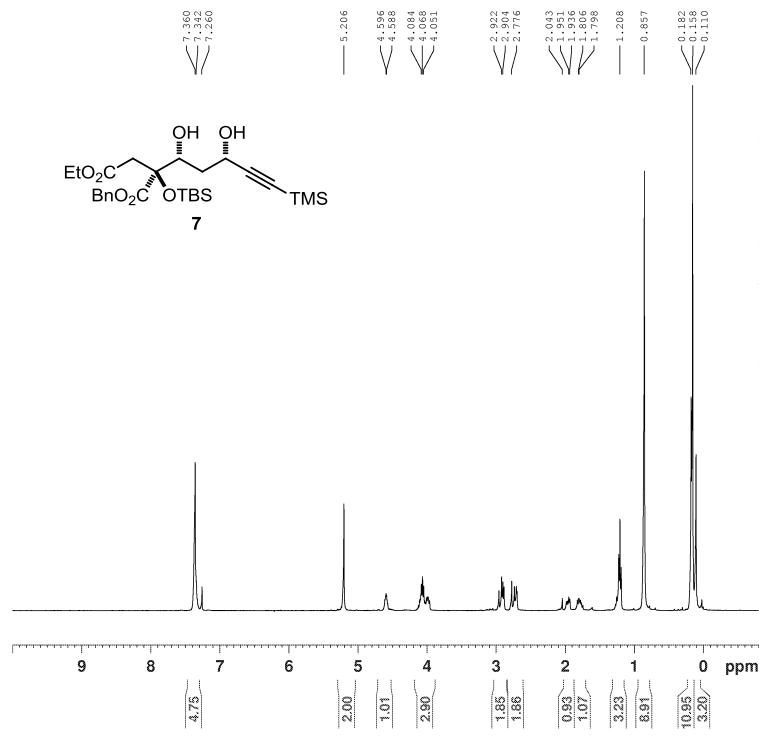

Current Data Parameters  
 NAME SNGIX-33-prod  
 EXPNO 1  
 PROCNO 1

F2 - Acquisition Parameters  
 Date\_ 20090115  
 Time 9.51  
 INSTRUM spect  
 PROBRD 5 mm QNP 1H/1  
 PULPROG zgpg30  
 TD 32768  
 SOLVENT CDCl3  
 NS 16  
 DS 0  
 SWH 6218.905 Hz  
 FIDRES 0.189386 Hz  
 AQ 2.6345973 sec  
 RG 96.5  
 DW 80.500 usec  
 DE 6.00 usec  
 TE 300.0 K  
 D1 1.0000000 sec  
 TD0 1

===== CHANNEL f1 =====  
 NUQ1 1H  
 P1 9.30 usec  
 PL1 0.00 dB  
 SF01 399.8424924 MHz

F2 - Processing parameters  
 SI 32768  
 SF 399.8400072 MHz  
 WNW 0  
 SSB 0  
 LB 0.30 Hz  
 GB 0  
 PC 1.00

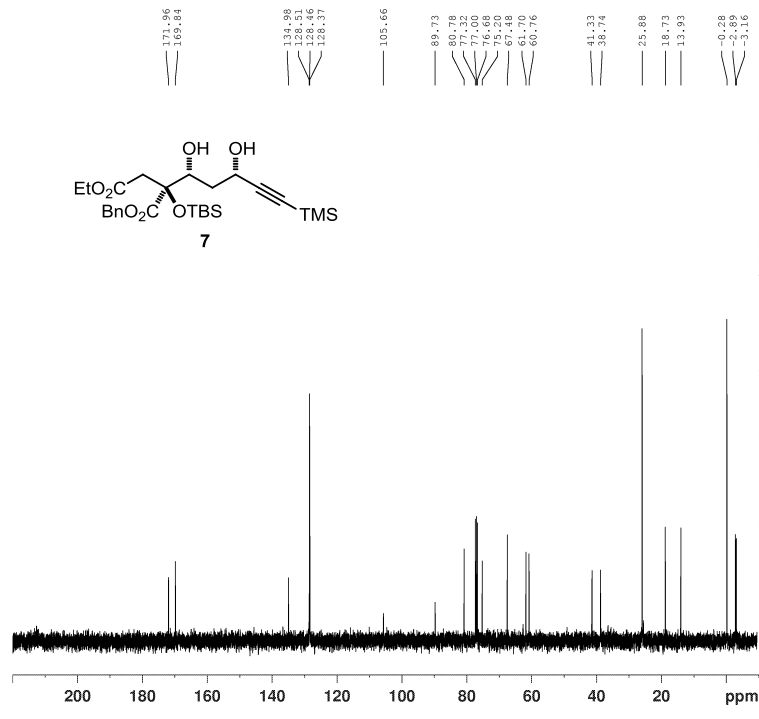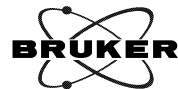

Current Data Parameters  
 NAME SNGIX-33-prod13  
 EXPNO 1  
 PROCNO 1

F2 - Acquisition Parameters  
 Date\_ 20090114  
 Time 17.03  
 INSTRUM spect  
 PROBRD 5 mm TXI 13C 2  
 PULPROG zgpg30  
 TD 65536  
 SOLVENT CDCl3  
 NS 264  
 DS 4  
 SWH 24038.461 Hz  
 FIDRES 0.346298 Hz  
 AQ 1.3631988 sec  
 RG 32768  
 DW 20.500 usec  
 DE 6.00 usec  
 TE 293.7 K  
 D1 1.0000000 sec  
 d11 0.0200000 sec  
 DELTA 0.8999999 sec  
 TD0 1

===== CHANNEL f1 =====  
 NUQ1 13C  
 P1 20.00 usec  
 PL1 0.00 dB  
 SF01 100.6137773 MHz

===== CHANNEL f2 =====  
 CPDPRG2 waltz16  
 NUQ2 1H  
 P2P2 80.00 usec  
 PL2 0.00 dB  
 PL12 17.64 dB  
 PL13 25.00 dB  
 SF02 400.9316004 MHz

F2 - Processing parameters  
 SI 65536  
 SF 100.6027215 MHz  
 WNW 0  
 SSB 0  
 LB 1.00 Hz  
 GB 0  
 PC 1.40

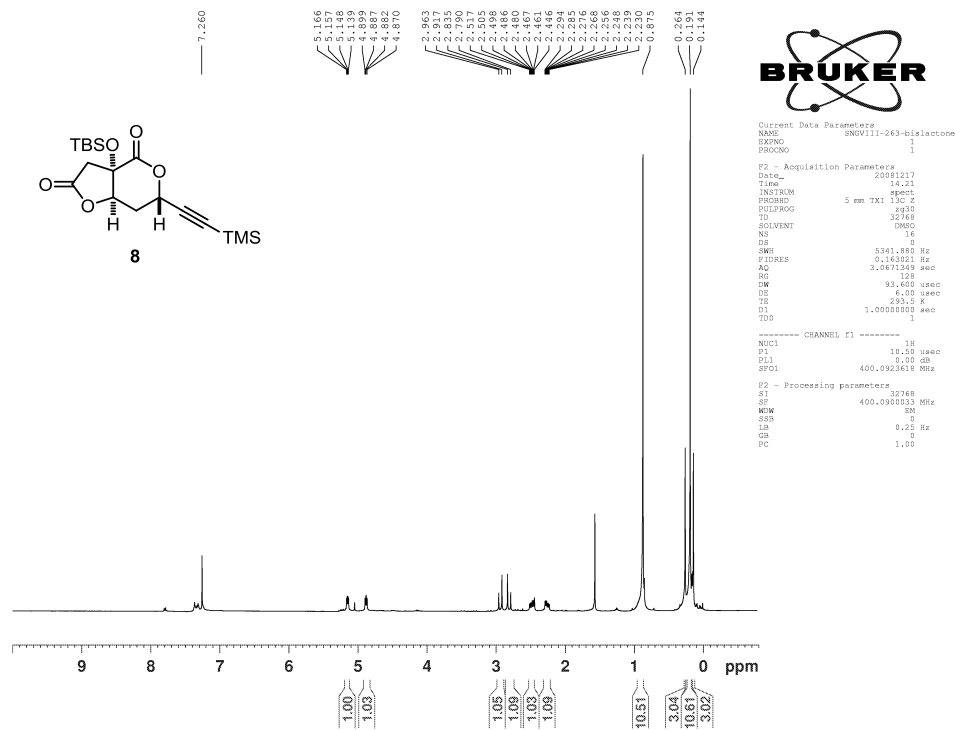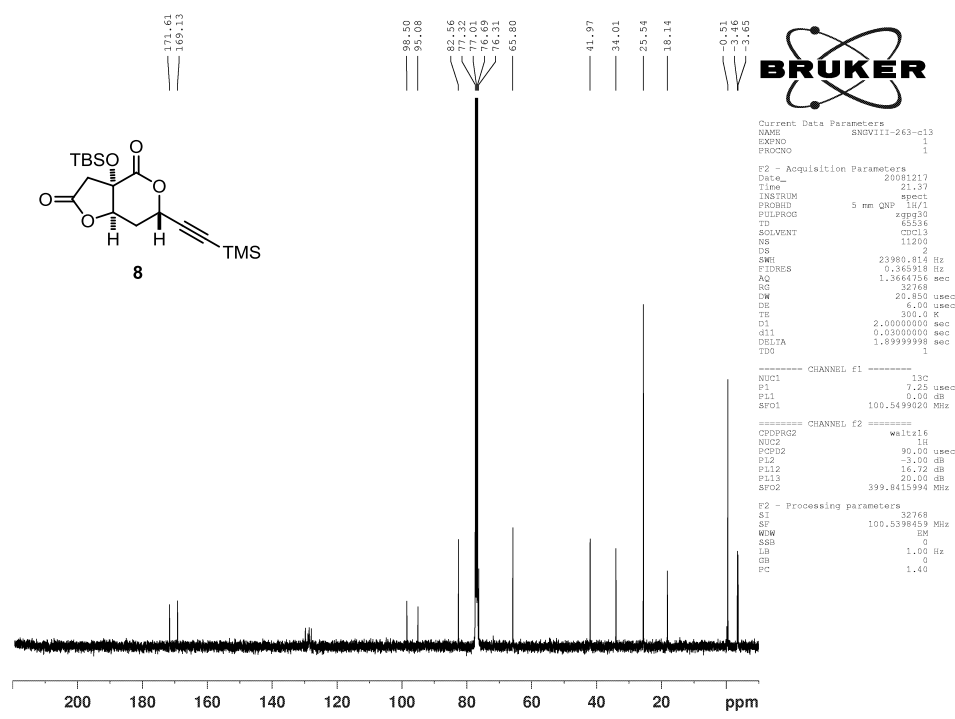

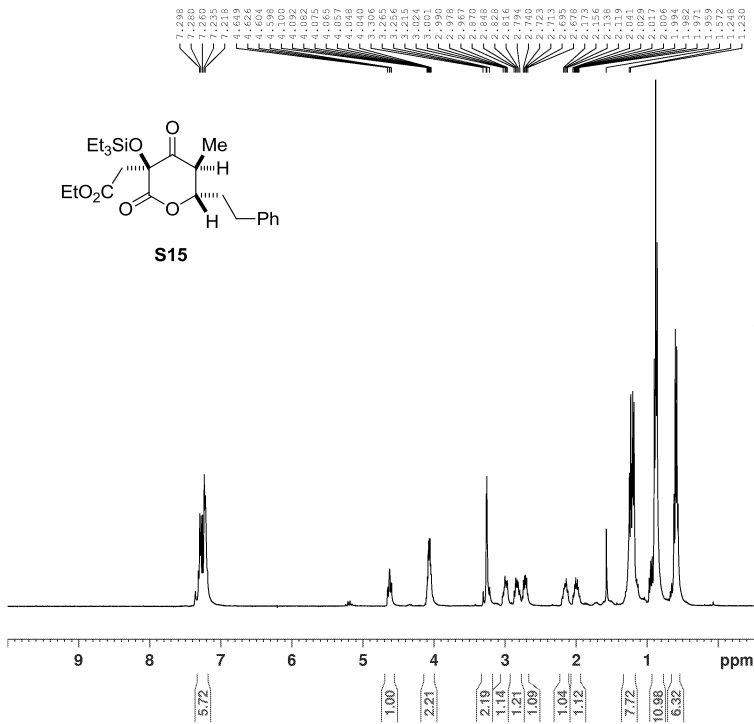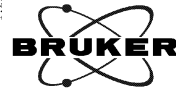

Current Data Parameters  
 NAME JTM-6-197-1  
 EXPNO 1  
 PROCNO 1

F2 - Acquisition Parameters  
 Date\_ 20100925  
 Time 9.37  
 INSTRUM spect  
 PROBHD 5 mm QNP  
 PULPROG zg30  
 TD 32768  
 DE 6.00 usec  
 SOLVENT cdcl3  
 NS 16  
 DS 0  
 SWH 6218.905 Hz  
 FIDRES 0.183786 Hz  
 AQ 2.6245973 sec  
 RG 161.3  
 DW 80.400 usec  
 DE 6.00 usec  
 TE 300.0 K  
 D1 1.00000000 sec  
 TDO 1

==== CHANNEL f1 =====  
 NUC1 1H  
 P1 9.30 usec  
 PL1 -3.00 dB  
 SF01 399.7824920 MHz

F2 - Processing parameters  
 SI 32768  
 SF 399.7800108 MHz  
 MEW EM  
 SSB 0  
 LB 0.30 Hz  
 GB 0  
 PC 1.00

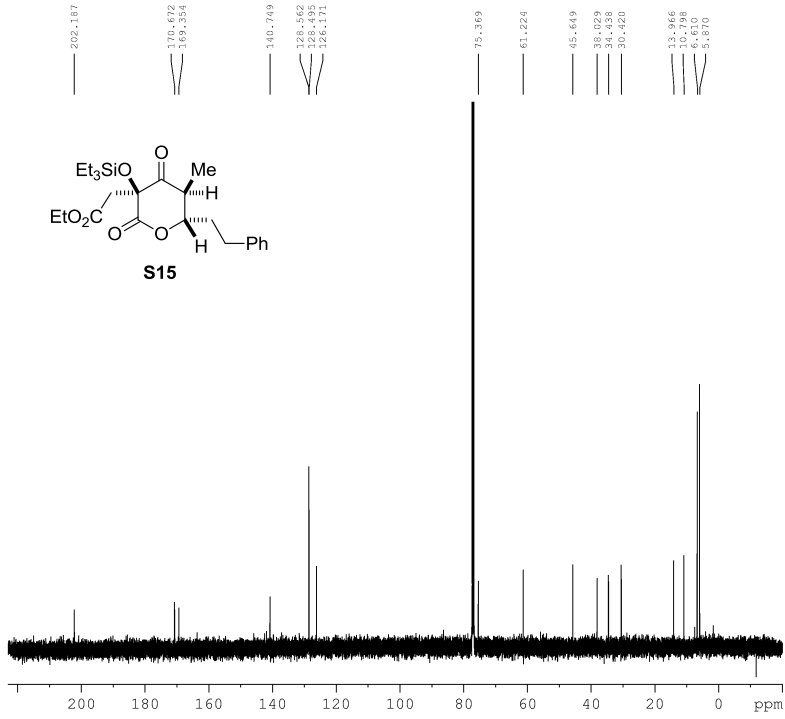

Current Data Parameters  
 NAME JTM-6-195-2 13C  
 EXPNO 1  
 PROCNO 1

F2 - Acquisition Parameters  
 Date\_ 20100923  
 Time 16.57  
 INSTRUM spect  
 PROBHD 5 mm PABBO BH/7  
 PULPROG zgpg30  
 TD 45556  
 SOLVENT cdcl3  
 NS 1469  
 DS 0  
 SWH 30581.039 Hz  
 FIDRES 0.444650 Hz  
 AQ 1.0715799 sec  
 RG 10221.3  
 DW 16.350 u  
 DE 6.00 u  
 TE 295.1 K  
 D1 1.00000000 sec  
 d11 0.00000000 sec  
 DELTA 0.89999998 sec  
 TDO 1

==== CHANNEL f1 =====  
 NUC1 13C  
 P1 6.80 u  
 PL1 0.60 dB  
 SF01 125.7705462 MHz

==== CHANNEL f2 =====  
 CPDPRG2 waltz16  
 NUC2 1H  
 FCPD2 100.00 u  
 PL2 -3.00 dB  
 PL12 14.00 dB  
 PL13 14.00 dB  
 SF02 500.1320005 MHz

F2 - Processing parameter:  
 SI 65536  
 SF 125.7577936 MHz  
 MEW EM  
 SSB 0  
 LB 0.50 Hz  
 GB 0  
 PC 1.40

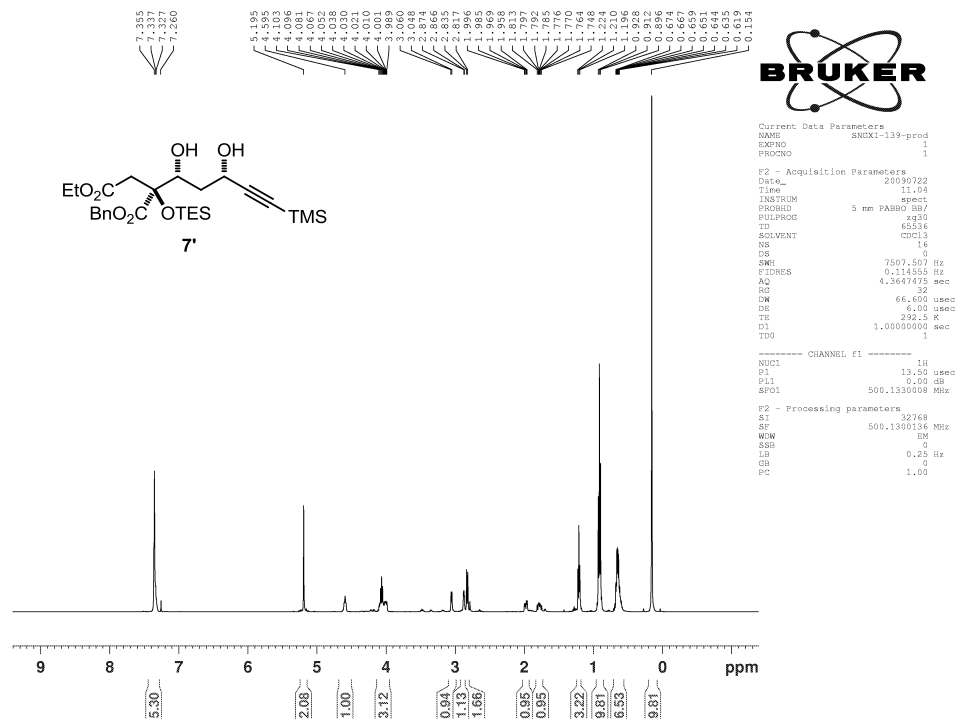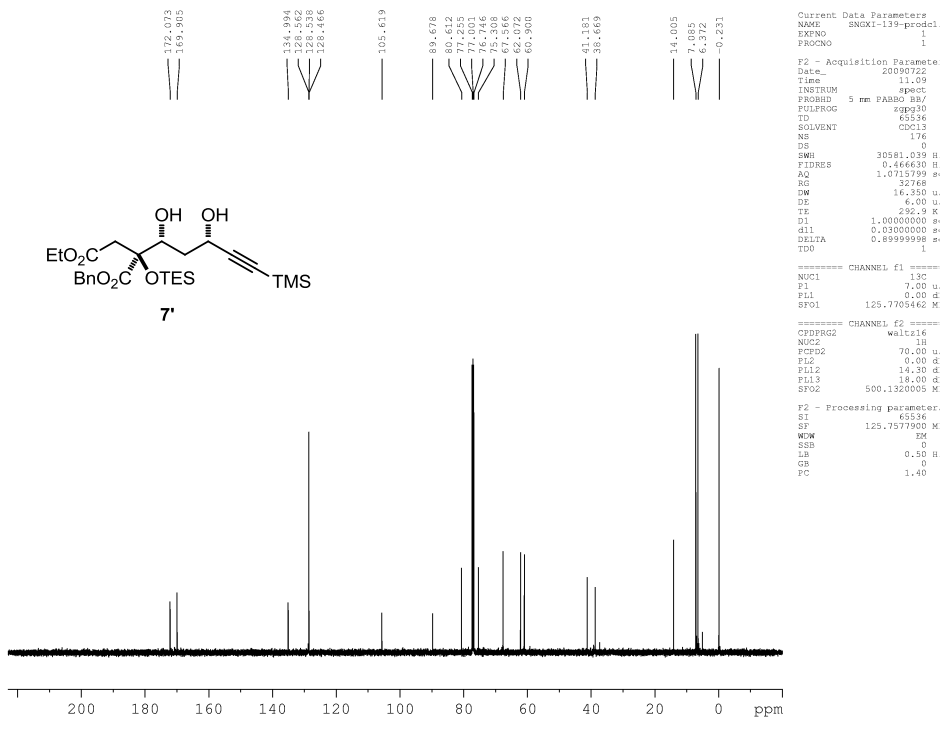



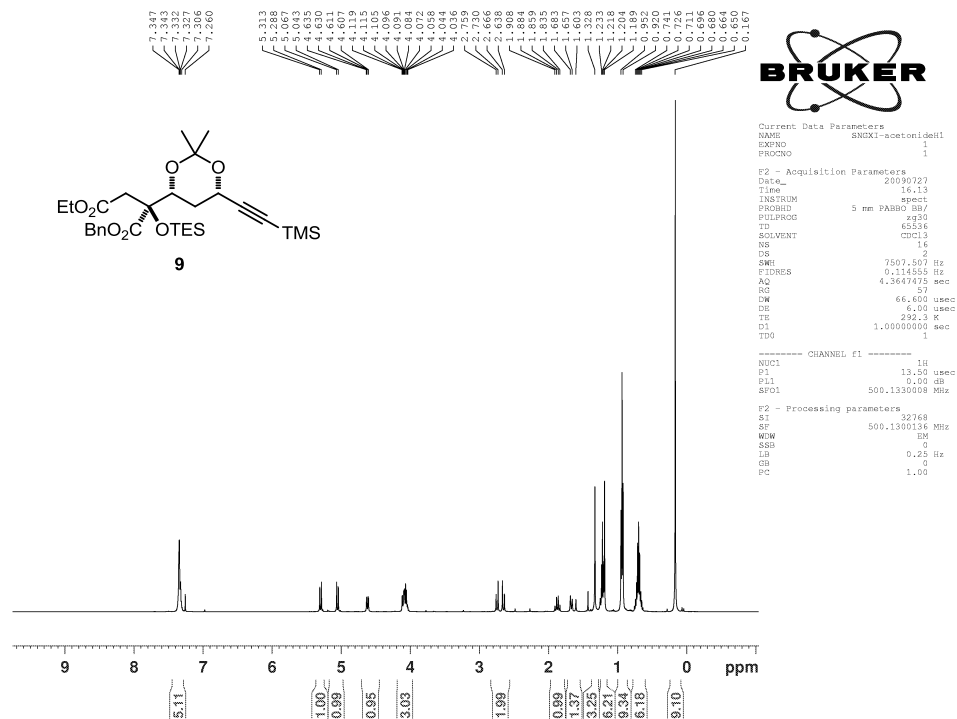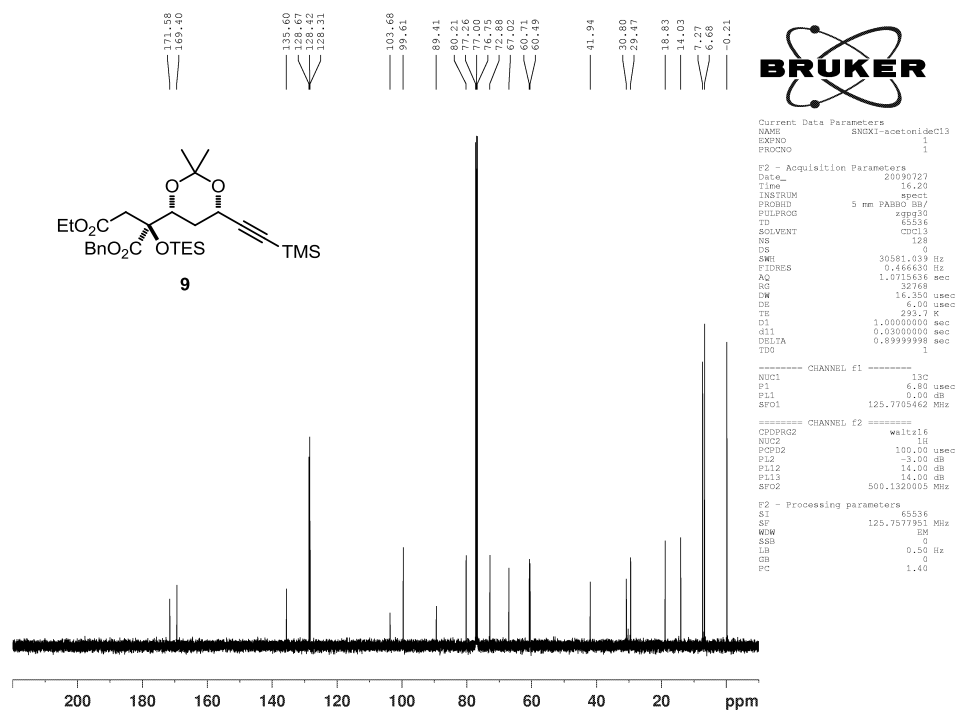

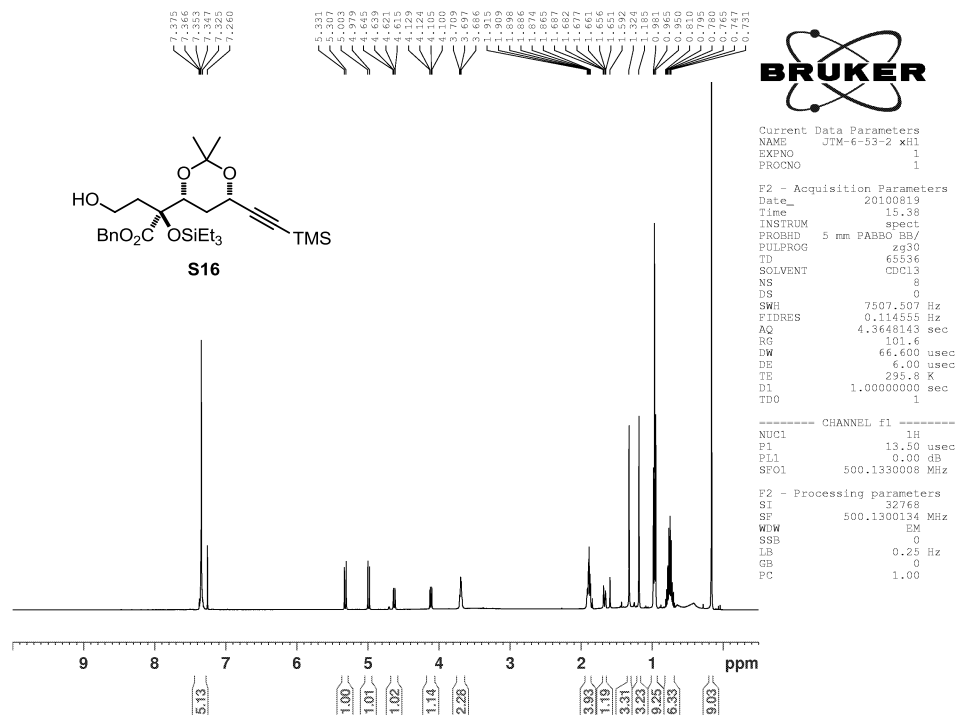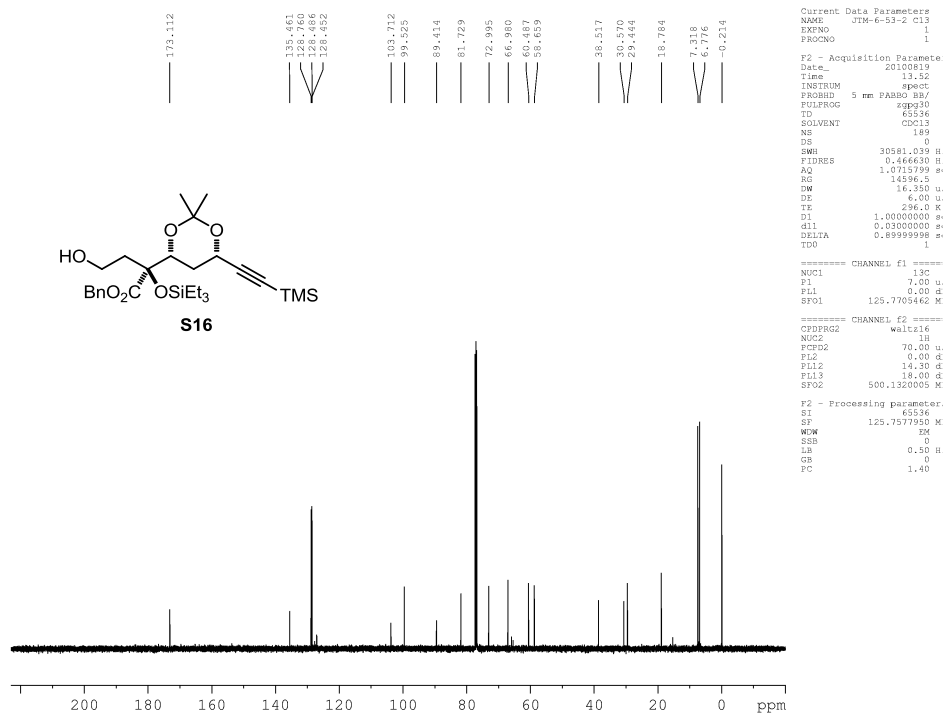

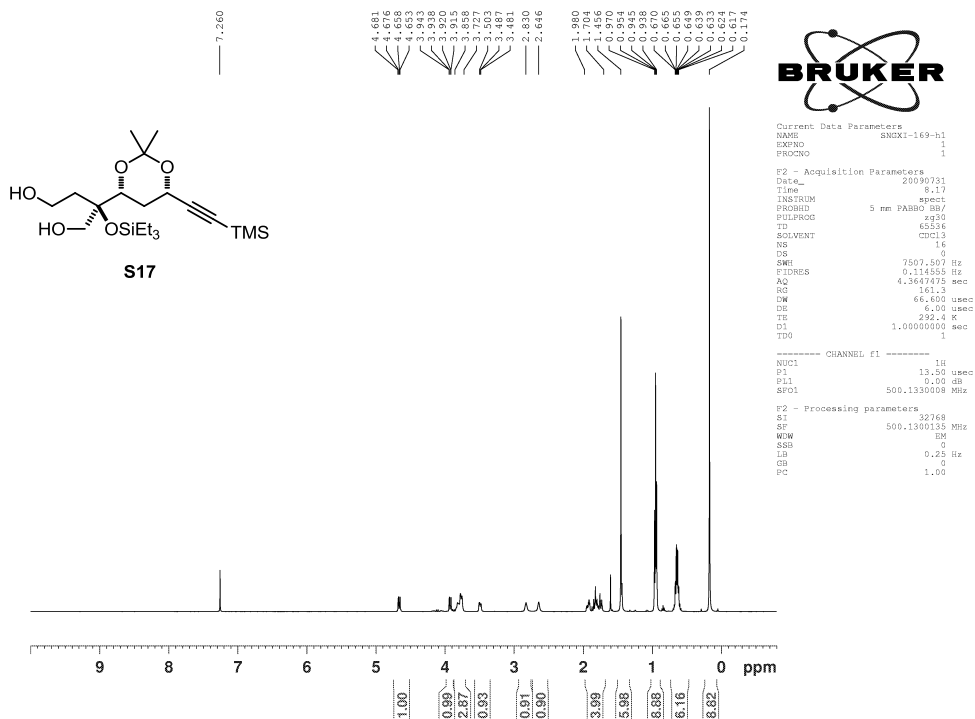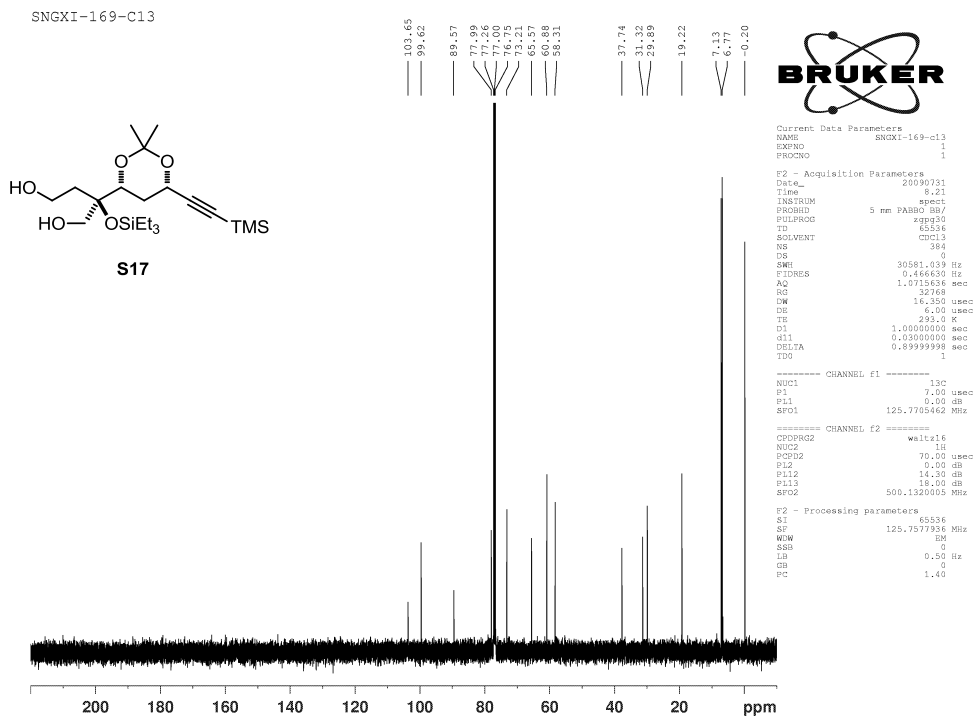

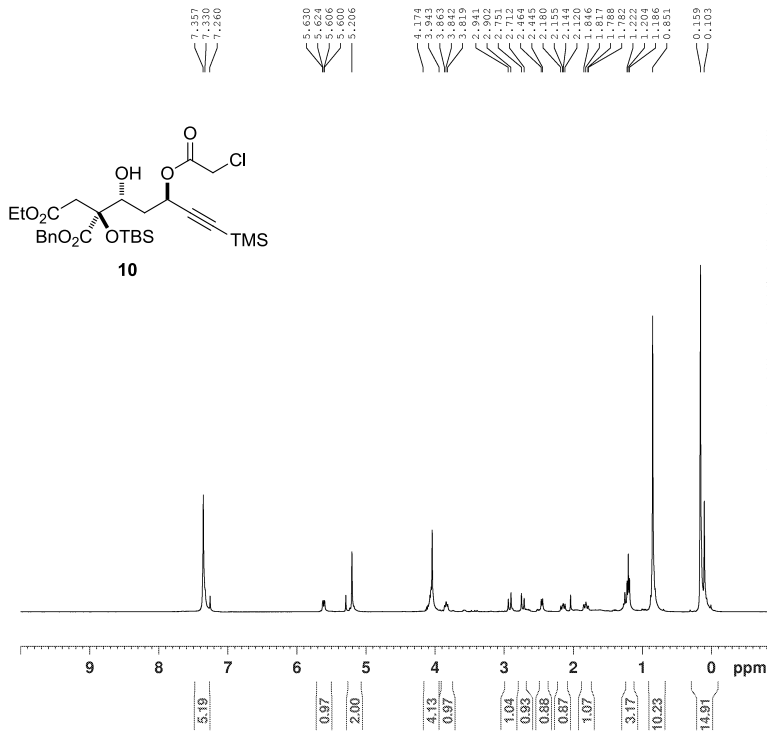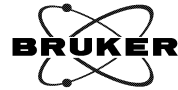

Current Data Parameters  
 NAME SMC-221-prod  
 EXPNO 1  
 PROCNO 1

F2 - Acquisition Parameters  
 Date\_ 20100711  
 Time 11:29  
 INSTRUM spect  
 PROBRD 5 mm QNP 1H/1  
 PULPROG zgpg30  
 TD 32768  
 SOLVENT CDCl3  
 NS 16  
 DS 0  
 SWH 6218.905 Hz  
 FIDRES 0.1189986 Hz  
 AQ 2.6350712 sec  
 RG 114  
 DW 80.500 usec  
 DE 6.00 usec  
 TE 300.0 K  
 D1 1.0000000 sec  
 TD0 1

----- CHANNEL f1 -----  
 NUC1 1H  
 P1 9.30 usec  
 PL1 -3.00 dB  
 SFO1 399.7824520 Mhz

F2 - Processing parameters  
 SI 32768  
 SF 399.7800109 Mhz  
 WHW EM  
 SSB 0  
 LB 0.30 Hz  
 GB 0  
 PC 1.00

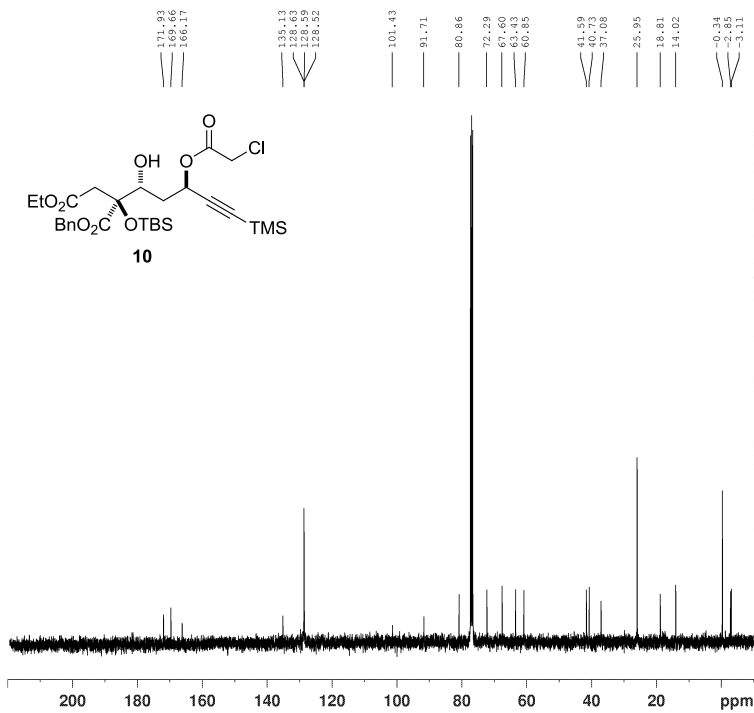

Current Data Parameters  
 NAME SMC-221-prod213  
 EXPNO 1  
 PROCNO 1

F2 - Acquisition Parameters  
 Date\_ 20100711  
 Time 11:30  
 INSTRUM spect  
 PROBRD 5 mm QNP 1H/1  
 PULPROG zgpg30  
 TD 32768  
 SOLVENT CDCl3  
 NS 2150  
 DS 0  
 SWH 23980.814 Hz  
 FIDRES 0.731836 Hz  
 AQ 0.682628 sec  
 RG 16384  
 DW 20.850 usec  
 DE 6.00 usec  
 TE 300.0 K  
 D1 1.0000000 sec  
 d11 0.0300000 sec  
 DELTA 0.8999998 sec  
 TD0 1

===== CHANNEL f1 =====  
 NUC1 13C  
 P1 7.42 usec  
 PL1 0.00 dB  
 SFO1 100.5381134 Mhz

===== CHANNEL f2 =====  
 CPDPRG2 waltz16  
 NUC2 1H  
 PCPD2 90.00 usec  
 PL2 -3.00 dB  
 PL12 16.72 dB  
 PL13 20.00 dB  
 SFO2 399.7815991 Mhz

F2 - Processing parameters  
 SI 32768  
 SF 100.5247600 Mhz  
 WHW EM  
 SSB 0  
 LB 1.50 Hz  
 GB 0  
 PC 1.40

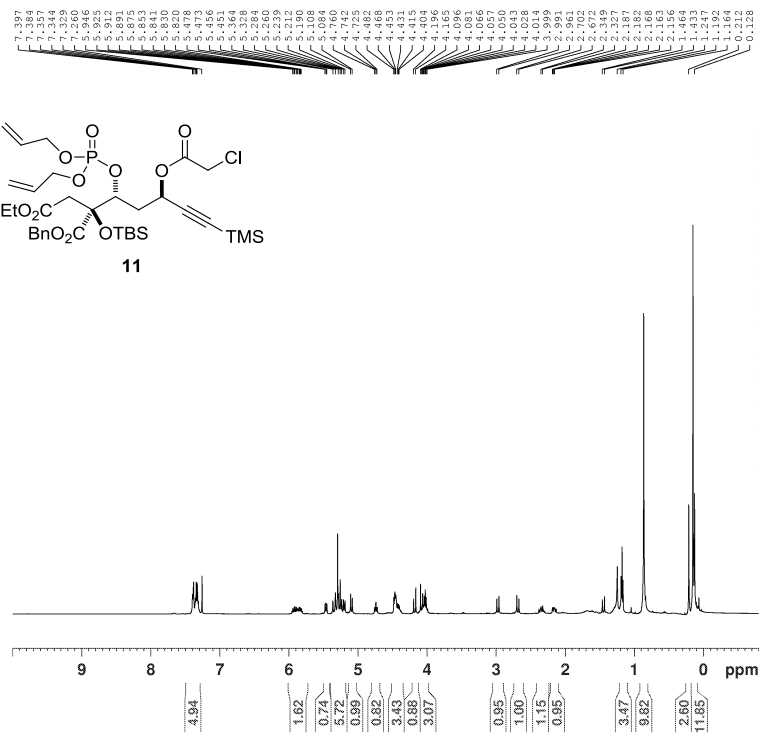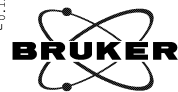

Current Data Parameters  
 NAME SNG-227-phosphate-H1  
 EXPNO 1  
 FREQNO 1  
 P2 - Acquisition Parameters  
 Date\_ 20100713  
 Time 17:43  
 INSTRUM spect  
 PROBHD 5 mm PABBO BBI  
 PULPROG zg30  
 TD 65536  
 SOLVENT CDCl3  
 NS 16  
 DS 0  
 SWH 7501.507 Hz  
 FIDRES 0.114555 Hz  
 AQ 4.3647475 sec  
 RG 328  
 DW 66.600 usec  
 DE 6.00 usec  
 TE 291.3 K  
 D1 1.00000000 sec  
 TDO  
 ===== CHANNEL f1 =====  
 NUC1 1H  
 P1 13.40 usec  
 PL1 0.00 dB  
 SFO1 500.1330008 MHz  
 P2 - Processing parameters  
 SI 32748  
 SF 500.1300133 MHz  
 WM EM  
 SSB 0  
 LB 0.25 Hz  
 GB 0  
 PC 1.00

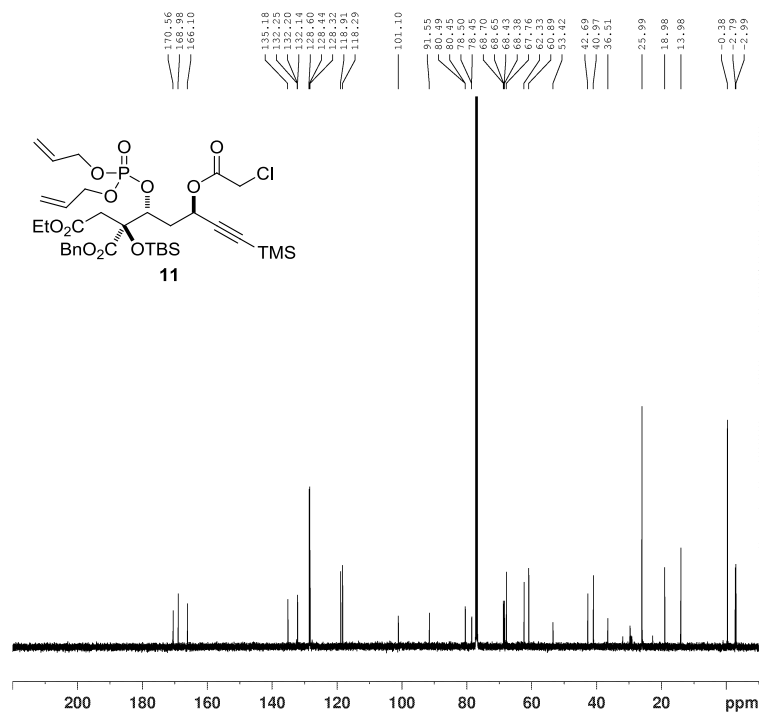

Current Data Parameters  
 NAME SNG-227-phosphate-Cl3  
 EXPNO 1  
 FREQNO 1  
 P2 - Acquisition Parameters  
 Date\_ 20100713  
 Time 17:46  
 INSTRUM spect  
 PROBHD 5 mm PABBO BBI  
 PULPROG zgpg30  
 TD 65536  
 SOLVENT CDCl3  
 NS 1690  
 DS 0  
 SWH 30081.039 Hz  
 FIDRES 0.464630 Hz  
 AQ 1.0715836 sec  
 RG 32748  
 DW 16.350 usec  
 DE 4.00 usec  
 TE 291.8 K  
 D1 1.00000000 sec  
 d11 0.23000000 sec  
 DELTA 0.89999999 sec  
 TDO  
 ===== CHANNEL f1 =====  
 NUC1 13C  
 P1 4.00 usec  
 PL1 0.00 dB  
 SFO1 125.7705462 MHz  
 ===== CHANNEL f2 =====  
 CPDPRG2 waltz16  
 NUC2 1H  
 PCPD2 70.00 usec  
 PL2 0.00 dB  
 PL12 14.20 dB  
 PL13 18.00 dB  
 SFO2 500.1330000 MHz  
 P2 - Processing parameters  
 SI 65536  
 SF 125.7571945 MHz  
 WM EM  
 SSB 0  
 LB 0.50 Hz  
 GB 0  
 PC 1.40
